# Supplementary material for: Endogenous siRNAs from naturally formed dsRNAs regulate transcripts in mouse oocytes
Source: Springer Nature journal article supplement (doi:10.1038/nature06908), 2008-04-10
Supplement: 41586_2008_BFnature06908_MOESM254_ESM.pdf [file 41586_2008_BFnature06908_MOESM254_ESM.pdf]

**Table of contents**

|                   |                                 |
|-------------------|---------------------------------|
| <b>Page 2-10</b>  | <b>Supplementary Methods</b>    |
| <b>Page 11</b>    | <b>Supplementary References</b> |
| <b>Page 12-21</b> | <b>Supplementary Figures</b>    |
| <b>Page 22-45</b> | <b>Supplementary Tables</b>     |

## Supplementary Methods

### Annotation of small RNAs

To know the exact positions of the small RNAs in the genome, we aligned the small RNA sequences with the genome using blastn (<ftp://ftp.ncbi.nlm.nih.gov/genbank/>) with a perfect match criterion. To identify small RNAs corresponding to various repeats (rRNA, tRNA, retrotransposon, DNA transposon etc.), the genomic positions of repeats were retrieved from the University of California, Santa Cruz (UCSC) web site (<http://hgdownload.cse.ucsc.edu/downloads.html>) and compared with the genomic positions of small RNAs. If the genomic position of a certain small RNA overlapped with any repeats by 15 nt, this small RNA was considered to be repeat-derived. Repeat names were retrieved from all positions where the small RNA was mapped, and if multiple repeat names were retrieved, the class (such as LTR/MaLR or rRNA) and subclass (such as IAP), where applicable, were determined according to the majority of positions (Supplementary Table 2). If the top two repeats had the same number of positions, we did not determine the class or subclass. To identify small RNAs corresponding to tRNAs, rRNAs, snRNAs, snoRNAs, scRNAs, miRNAs, piRNAs (known ones from adult testis) and mRNAs based on sequence similarity, we extracted the sequences of these RNAs from the flat files of GenBank and downloaded the

sequences from the following databases: tRNAs, Genomic tRNA Database (<http://lowelab.ucsc.edu/GtRNAdb/Mmuscl/>); rRNAs, European ribosomal RNA database (<http://www.psb.ugent.be/rRNA/index.html>); snoRNAs, snoRNA database (<http://www-snorna.biotoul.fr>) and RNA database (<http://jsm-research.imb.uq.edu.au/rnadbl/>); piRNAs, RNA database (<http://jsm-research.imb.uq.edu.au/rnadbl/>); miRNAs, miRBase (<http://microrna.sanger.ac.uk/sequences/index.shtml>); mRNAs, Refseq Genes (<ftp://ftp.ncbi.nih.gov/refseq/>) and Ensemble Genes (<http://www.ensembl.org/index.html>). Then blastn search (<ftp://ftp.ncbi.nih.gov/blast/>) was performed using our small RNA sequences as queries and the sequences downloaded as above as a database. Since the sequences downloaded in our database could not cover all RNA species present in cells, we aligned the small RNA sequences with the RNA sequences in the database using a 90% match criterion including indels. Namely, we allowed a single base mismatch for 17-19 nt small RNAs, 2 mismatches for 20-29 nt small RNAs, 3 mismatches for 30-39 nt small RNAs and 4 base mismatches for 40 nt small RNAs. We first used blastn program with an option not masking repeat sequences (-F, F) and extracted the best hit regions on the RNAs deposited in the database with extra 5 bases at both ends. Since blastn is a local alignment program, we re-aligned the small RNAs with the extracted RNA fragments

using an in-house global alignment program<sup>1</sup>. This program uses Needleman/Wunsch's global alignment algorithm<sup>2</sup> with Gotoh's affine gap penalty<sup>3</sup>, to find the optimal alignment (including indels) of two sequences considering their entire length. It uses dynamic programming methods to ensure the optimal global alignment by exploring all possible alignments and choosing the best. Except that our global alignment program can also take account of out gap penalty, it is almost the same as the "needle" program included in the EMBOSS package<sup>4</sup>. Finally, the repeat annotations based on genomic position and the annotations based on sequence similarity were combined. If a small RNA had more than one annotation, we used the following order of priority: rRNA, tRNA, snoRNA, sc/srpRNA, miRNA, rasiRNA, piRNA and mRNA. The non-annotated sequences were classified as unknown.

### **Identification of siRNA clusters**

For identification of candidates for siRNA clusters, we considered only small RNAs from growing oocytes that (1) constituted clusters, (2) hit the genome 1-10 times and (3) were annotated as repeat, mRNA, piRNA or unknown. A total of 444 small RNA clusters were subjected to the selection. We used the series of criteria described below to select siRNA clusters of the respective classes. The small RNA clusters selected at each filtering step in the three procedures are schematically shown in Supplementary Fig. 9.

*Selection procedure for hp-siRNA cluster*

1. Select clusters in which more than three small RNA sequences hit two times within a certain 5 kbp region. These two hits should lie in opposite orientations. (4/444)
2. In the clusters, the small RNAs of all pairs should be arranged in a symmetrical manner to form an inverted repeat. (4/4) The boundaries of the cluster are re-determined by the positions of the outermost pairs.
3. More than three unique hit small RNA sequences should be mapped within the cluster. (4/4)
4. More than 90% of the unique small RNA sequences should lie in the same orientation. (4/4)
5. More than 80% of small RNA sequences that constitute the cluster should be 19-23 nt in length. (4/4)

If only step 5 is applied to the 444 small RNA clusters, 106 meet its criterion. Thus, it is highly significant that all 4 clusters selected by steps 1-4 meet the criterion of step 5 ( $P = 0.034$ ;  $\chi^2$  test). The low p-value at step 5 and absence of clusters that dropped off at steps 2-4 suggest that inverted-repeat structures are found only among the 19-23 nt small RNA clusters.

*Selection procedure for trans-nat-siRNA cluster*

1. Select pairs of clusters, in which the partner clusters share more than two small

RNAs unique to the pair. (43/444; 23 pairs) (Three of the 43 clusters paired with two clusters.)

2. In each cluster of a pair, more than 90 % of unique small RNAs should be derived from the same strand. (17/43; 9 pairs)

3. In each pair, the shared unique small RNAs identified in step 1 should lie in the same orientation as the other unique small RNAs in one cluster but should lie in the opposite orientation in the other cluster. (16/17; 8 pairs)

4. More than 80% of small RNA sequences that constitute the cluster should be 19-23 nt in length. (14/16; 7 pairs) ( $P = 1.2 \times 10^{-8}$ ;  $\chi^2$  test)

The low p-value at step 4 and the fact that only one pair dropped off at step 3 suggest that the sense/antisense relationship is highly unique to the 19-23 nt small RNA clusters.

*Selection procedure for cis-nat-siRNA cluster*

1. Select clusters in which some unique small RNAs hit the sense strand while other unique small RNAs hit the antisense strand. [Number of sense (or antisense) unique small RNA sequences] / [Number of total unique small RNA sequences] should be between 0.25 and 0.75. (70/444)

2. The cluster should contain more than 10 small RNA sequences. (35/70)

3. More than 80% of small RNA sequences that constitute the cluster should be 19-23

nt in length. (17/35) ( $P = 0.0013$ ;  $\chi^2$  test)

Some piRNA clusters contain both sense and antisense piRNAs, and therefore step 1 would select both piRNA and siRNA clusters. Step 3 was therefore designed to exclude piRNA clusters; however, some piRNA clusters were not filtered out due to the presence of only a small number of small RNA sequences. We therefore added step 2 to decrease the false positive rate. The low p-value at step 3 suggests that 19-23 nt small RNA clusters were enriched by steps 1 and 2.

Of the top 30 clusters in terms of the number of mapped small RNA species, 25 clusters were either piRNA clusters or one of three classes of siRNA cluster (hp-siRNA, trans-nat-siRNA or cis-nat-siRNA) (Supplementary Fig. 10).

### **Prediction of miRNA-type hairpin structure**

To find miRNA-type hairpin structures, RNAsnp<sup>5</sup> and randfold<sup>6</sup> programs were used. The criteria used for selection were described previously<sup>7</sup>. After excluding the sequences that (1) completely match known miRNAs and (2) are annotated as r/t/sn/sno/sc/srpRNA, only 19-23 nt sequences that (1) were cloned more than three times and (2) hit the genome uniquely were used for this analysis. As a positive control, known miRNA loci registered in miRBase (Ref. 8) were used. As a negative control, randomly selected loci from the mouse genome were analyzed.

### **Oligo Sequences**

| <b>Primer name</b>                                                          | <b>Sequence</b>          |
|-----------------------------------------------------------------------------|--------------------------|
| <i>Primers used for expression analysis of small RNA pathway components</i> |                          |
| Dicer F                                                                     | TGGCACCAGCAAGAGACTCA     |
| Dicer R                                                                     | CTGGGAGATGCGATTTTGGGA    |
| Ago1 F                                                                      | GGCATCTCAAGAATACCTACTCAG |
| Ago1 R                                                                      | CTACCACTGCTGTGATAGATGGT  |
| Ago2 F                                                                      | TCAAGCTGGAGAAGGACTATCAGC |
| Ago2 R                                                                      | TGATCTTCGTGTCCACGGTTGTG  |
| Ago3 F                                                                      | TCCCTGCACCAGCATATTACG    |
| Ago3 R                                                                      | TGTGGATCTCGCCCATTGC      |
| Ago4 F                                                                      | AGATAAAATGGAAAGGGTGGGG   |
| Ago4 R                                                                      | AATGTGAAGGACGGCTGGTTC    |
| Actin F                                                                     | CCACCACAGCTGAGAGGGAA     |
| Actin R                                                                     | AGCCACCGATCCACACAGAG     |
| <i>Primers used for quantitative PCR of individual small RNAs</i>           |                          |
| Universal primer F (5' linker sequence)                                     | AAAGATCCTGCAGGTGCGTCA    |
| Plant MIR164                                                                | TGCACGTGCCCTGCTTCT       |
| let7f F                                                                     | ACTATAACAATCTACTACCTCA   |
| miR-16 F                                                                    | GCCAATATTTACGTGCTGCTA    |



|                                       |                        |
|---------------------------------------|------------------------|
| miR-103 F                             | CATAGCCCTGTACAATGCTGCT |
| miR-183 F                             | GTGAATTCTACCAGTGCCATA  |
| 25-26 nt small RNA1 F                 | GACTCTAGATACCGGGGTTCA  |
| 25-26 nt small RNA2 F                 | TGTCCTGCTACTCCGTGCCTA  |
| 25-26 nt small RNA3 F                 | AAGCCAGTCTAATAGCCACAA  |
| 25-26 nt small RNA4 F                 | TACCAATCCCAGCAATGCC    |
| hp-siRNA1 F (21 nt small RNA1 F)      | GCTCTAAGGGCACCGTT      |
| hp-siRNA2 F (21 nt small RNA2 F)      | ACAGCATCTGCGAAGGC      |
| cis-nat-siRNA1 F (21 nt small RNA3 F) | ACCGCCTAAAGGTTTGTC     |

***Primers used for 5'RACE analysis of cis-nat-siRNA clusters***

|                                          |                             |
|------------------------------------------|-----------------------------|
| Kif4 exon3 R                             | CTGCCCATAGGCCAGGACAGTTGCA   |
| Kif4 exon2 R (for 2 <sup>nd</sup> PCR)   | CCTGTTTCAGTAGAGGGGTCAAACACA |
| Pdzd11 exon3 R                           | CTGCCCATAGGCCAGGACAGTTGCA   |
| Pdzd11 exon2 R (for 2 <sup>nd</sup> PCR) | GTCATCATAGGGAATCCGGTTGTCCA  |

***Primers used for quantitative PCR of mRNAs and retrotransposons***

|           |                          |
|-----------|--------------------------|
| Rangap1 F | ATGGCTGAGACTCTGAAGACTCTG |
| Rangap1 R | ACGGACAGCATCTGCGATGGCAAC |
| Ppp4r F   | CCTGCTCCAGTGGACAGCTCCT   |
| Ppp4r R   | GCAGACTTGCTGTTGGTGTCAG   |

|              |                             |
|--------------|-----------------------------|
| Kif4 F       | GTAAGAGTGGCACTGCGTTGTCG     |
| Kif4 R       | TAAAGACCTCTTCCTGTTTCAGTAGAG |
| Pdzd F       | AAGCTGGCTAGACCTCTGAGA       |
| Pdzd R       | GAACTCCTAGTACAGTACAGT       |
| Beta-actin F | ACAGCTTCTTTGCAGCTCCT        |
| Beta-actin R | ATTCCCACCATCACACCCTG        |
| GAPD F       | ATGACATCAAGAAGGTGGTG        |
| GAPD R       | CATACCAGGAAATGAGCTTG        |
| EGFP F       | GAACCGCATCGAGCTGAAGG        |
| EGFP R       | CGGATCTTGAAGTTCACCTTGATGC   |
| IAP1 F       | ACAAGAAAAGAAGCCCGTGA        |
| IAP1 R       | GCCAGAACATGTGTCAATGG        |
| L1Md F       | GAGACATAACAACAGATCCTGA      |
| L1Md R       | GAACTTTGGTACCTGGTATCTG      |
| RLTR10 F     | GTGAAGGTAGAGGTCTGATC        |
| RLTR10 R     | GAAGGTATGTCTGATTGCATG       |
| MTA F        | ATGTCTTGGGGAGGACTGTG        |
| MTA R        | AGCCCCAGCTAACCAGAACT        |

## Supplementary References

1. Hirosawa, M., Totoki, Y., Hoshida, M. & Ishikawa, M. Comprehensive study on iterative algorithms of multiple sequence alignment. *Comput Appl Biosci* **11**, 13-18 (1995).
2. Needleman, S. B. & Wunsch, C. D. A general method applicable to the search for similarities in the amino acid sequence of two proteins. *J Mol Biol* **48**, 443-453 (1970).
3. Gotoh, O. An improved algorithm for matching biological sequences. *J Mol Biol* **162**, 705-708 (1982).
4. Rice, P., Longden, I. & Bleasby, A. EMBOSS: the European Molecular Biology Open Software Suite. *Trends Genet* **16**, 276-277 (2000).
5. Steffen, P., Voss, B., Rehmsmeier, M., Reeder, J. & Giegerich, R. RNAshapes: an integrated RNA analysis package based on abstract shapes. *Bioinformatics* **22**, 500-503 (2006).
6. Bonnet, E., Wuyts, J., Rouze, P. & Van de Peer, Y. Evidence that microRNA precursors, unlike other non-coding RNAs, have lower folding free energies than random sequences. *Bioinformatics* **20**, 2911-2917 (2004).
7. Berezikov, E. et al. Diversity of microRNAs in human and chimpanzee brain. *Nat Genet* **38**, 1375-1377 (2006).
8. Griffiths-Jones, S., Grocock, R. J., van Dongen, S., Bateman, A. & Enright, A. J. miRBase: microRNA sequences, targets and gene nomenclature. *Nucleic Acids Res* **34**, D140-144 (2006).
9. Murchison, E. P. et al. Critical roles for Dicer in the female germline. *Genes Dev* **21**, 682-693 (2007).

## Supplementary Figure 1

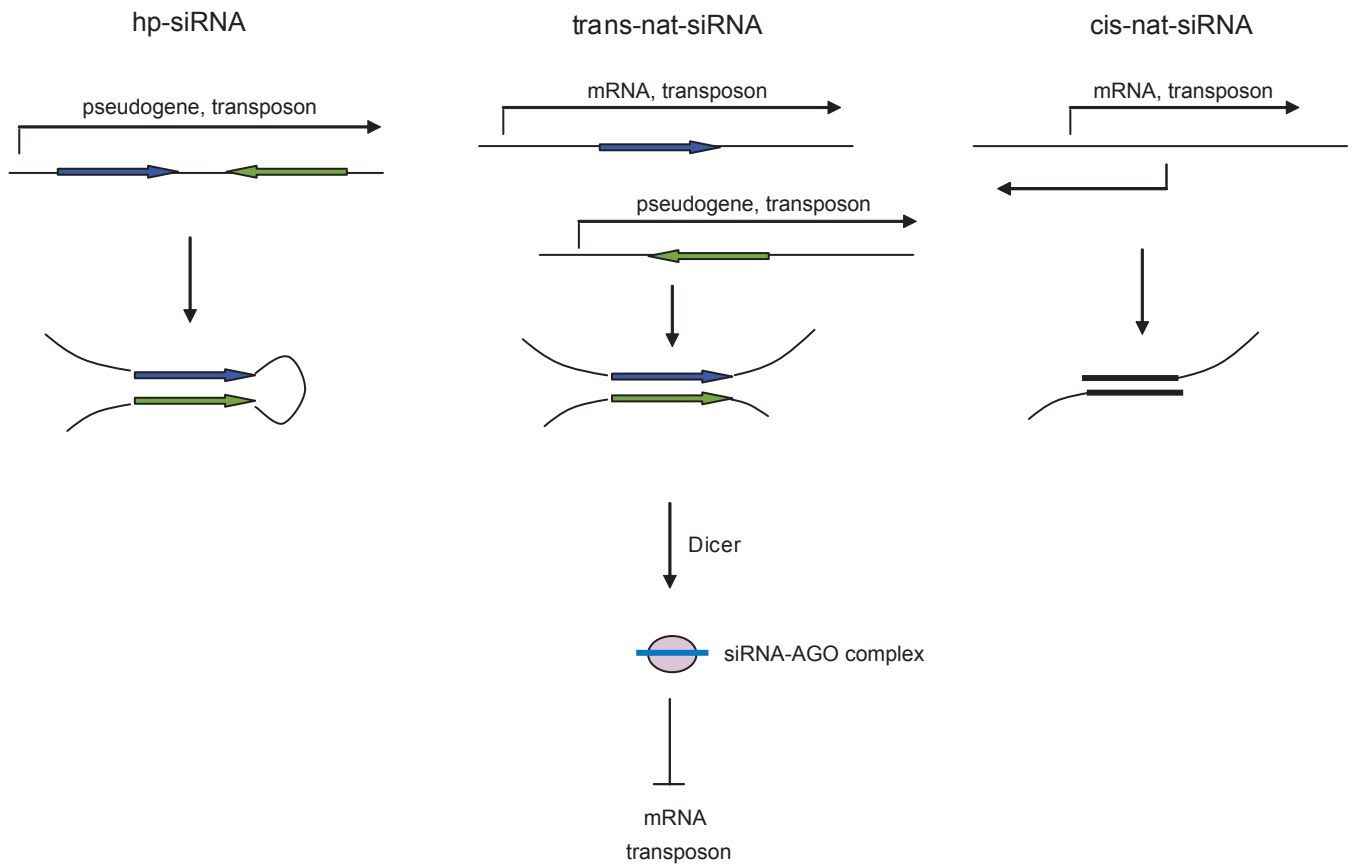

Supplementary Figure 1. siRNA pathways in mouse oocytes.

Double-stranded RNAs, which are the precursors of siRNAs, are produced in three different ways. Blue and green arrows indicate homologous sequences oriented in opposite directions.

## Supplementary Figure 2

a

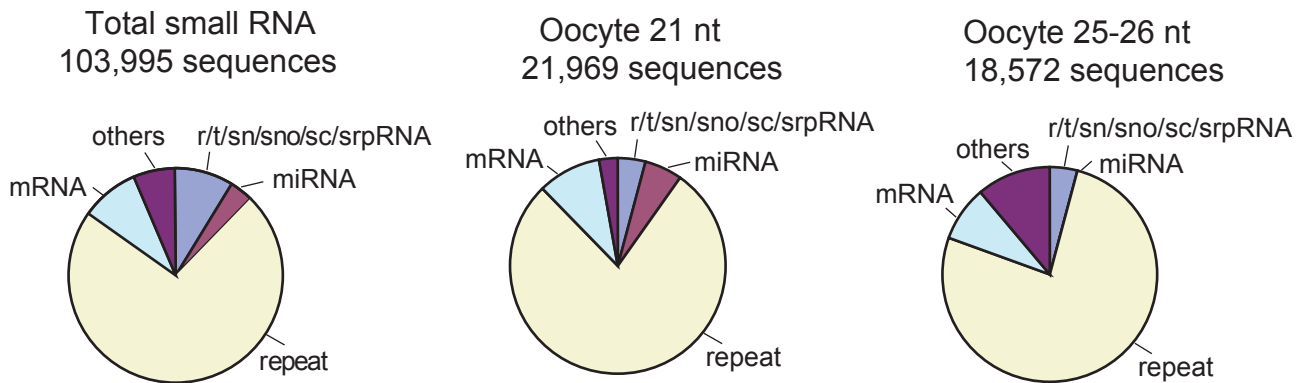

b

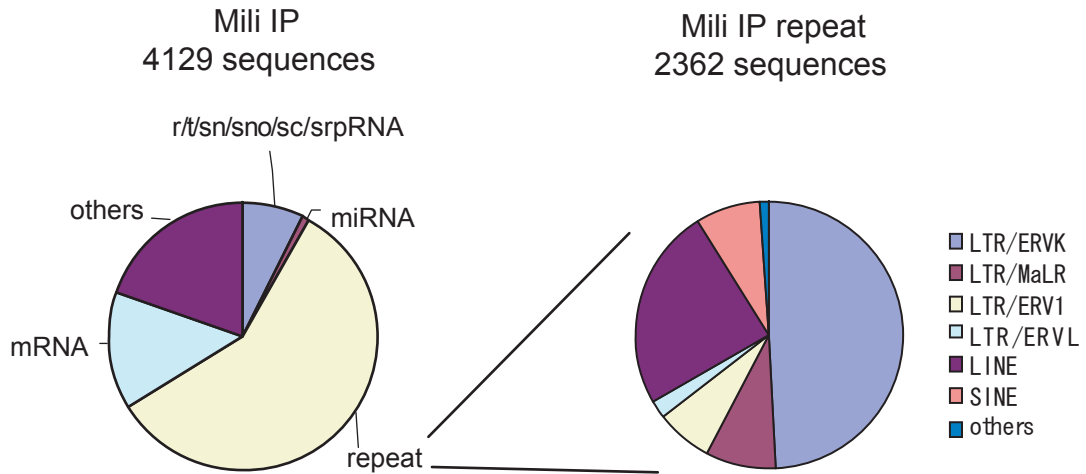

Supplementary Figure 2. Annotation of small RNAs.

(a) Annotation of total (left), 21 nt (middle) and 25-26 nt (right) small RNAs from growing oocytes.

(b) Annotation of Mili-IP small RNAs from P8 ovaries.

## Supplementary Figure 3

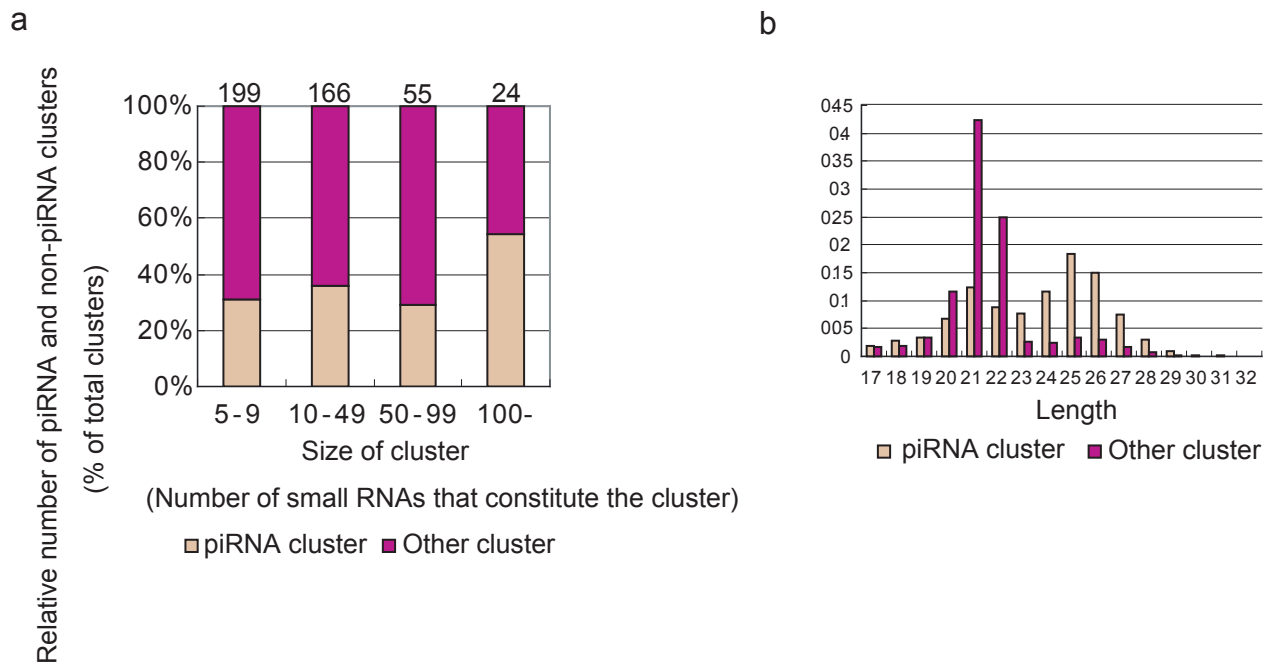

Supplementary Figure 3. piRNA clusters and 21 nt small RNA clusters.

(a) The ratio of the number of piRNA clusters to that of the other small RNA clusters in oocytes. About half of the clusters with more than 100 mapped small RNAs were non-piRNA clusters. The numbers above the bars denote the total number of clusters of the indicated size.

(b) The length distribution of small RNAs that constitute piRNA and other clusters. The small RNAs from the piRNA clusters showed two peaks: the one at 21 nt is due to the fact that some piRNA clusters contain siRNAs (for example, see Supplementary Figure 7).

## Supplementary Figure 4

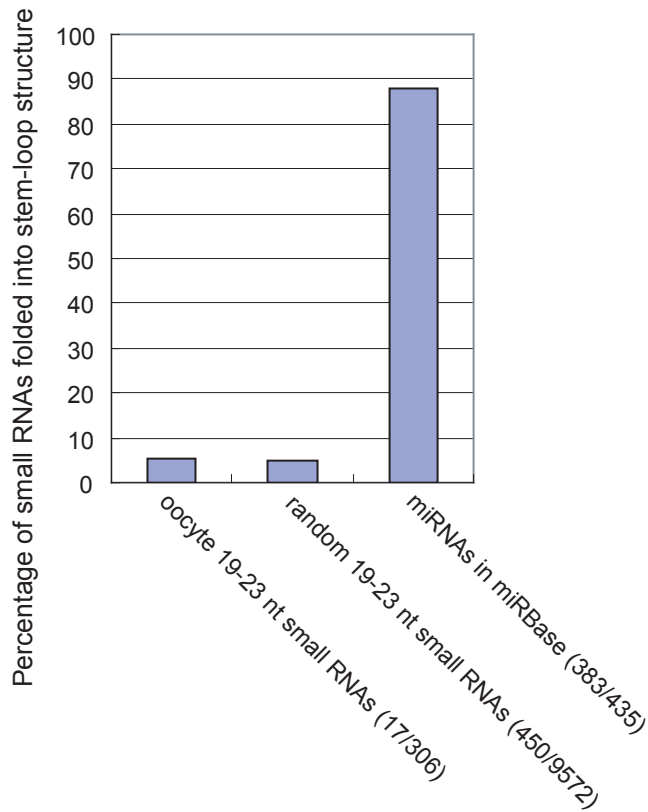

Supplementary Figure 4. Most of the genomic sequences encompassing 19-23 nt small RNAs from growing oocytes do not form an miRNA-type hairpin structure.

The RNAshapes program and randfold program were used to predict whether sequences form an miRNA-type hairpin structure. miRNA sequences registered in miRBase and 19-23 nt sequences randomly retrieved from the mouse genome were also analyzed as positive and negative controls respectively. The number of sequences with a hairpin structure and the total number of analyzed sequences are shown in parentheses.

## Supplementary Figure 5

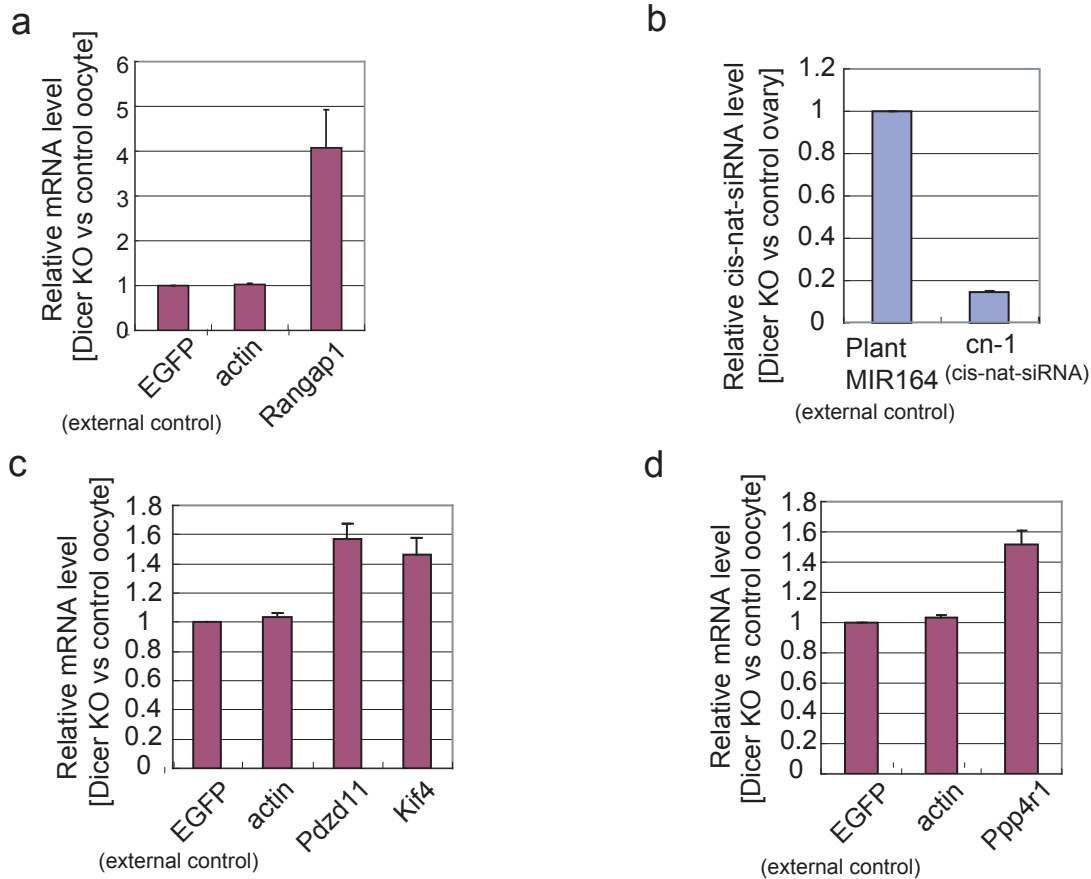

Supplementary Figure 5. Dicer-dependent regulation of target mRNAs and Dicer-dependent accumulation of cis-nat-siRNAs.

(a) Quantitative RT-PCR analysis of Rangap1, the founding source gene of Au76, in conditional Dicer KO oocytes. Error bars represent S.E. (n=3). The amounts of the EGFP (external control), actin (internal control) and Rangap1 mRNAs in conditional Dicer KO oocytes were divided by those in oocytes that do not express Cre recombinase.

(b) Quantitative RT-PCR analysis of a cis-nat-siRNA derived from Pdzd11/Kif4 locus in conditional Dicer KO ovaries. The amounts of this RNA in conditional Dicer KO ovaries relative to those in ovaries that do not express Cre recombinase are shown. MIR164 served as an external control. Error bars represent S.D. (n=3). Amplified products were sequenced and confirmed.

(c) Quantitative RT-PCR analysis of Pdzd11 and Kif4. Error bars represent S.E. (n=3). The amounts of EGFP (external control), actin (internal control), Pdzd11 and Kif4 mRNAs in conditional Dicer KO oocytes were divided by those in oocytes that do not express Cre recombinase.

(d) Quantitative RT-PCR analysis of Ppp4r1 mRNA. Error bars represent S.E. (n=3). The amounts of EGFP (external control), actin (internal control) and Ppp4r1 mRNAs in conditional Dicer KO oocytes were divided by those in oocytes that do not express Cre recombinase.



## Supplementary Figure 6

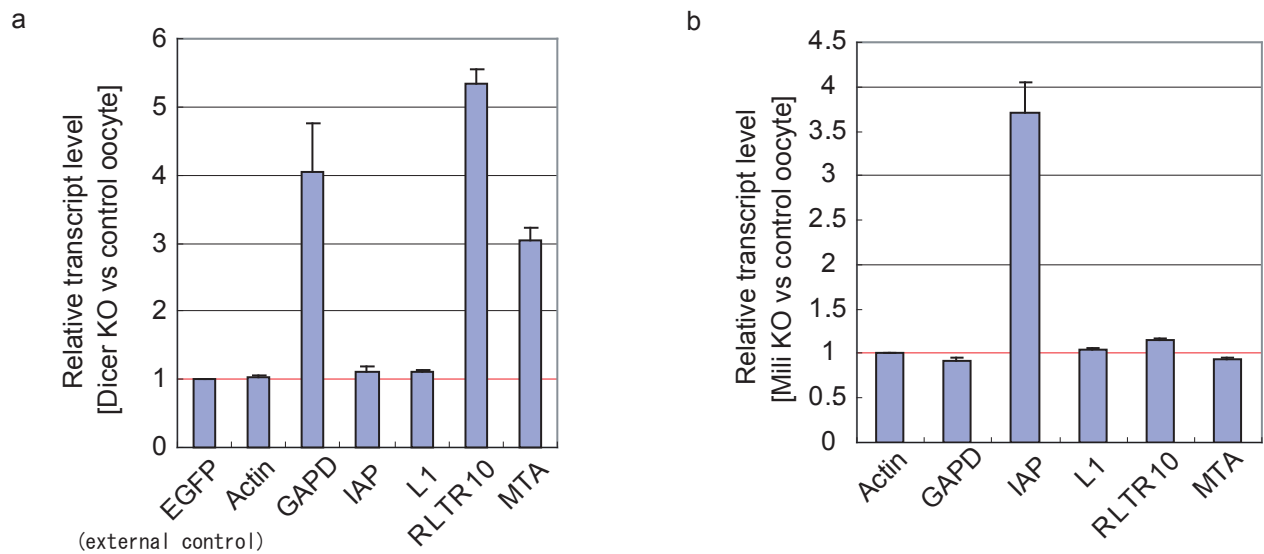

Supplementary Figure 6. Both piRNA and siRNA pathways repress retrotransposons. Recently, Murchison et al. reported that some retrotransposons were activated in conditional Dicer KO oocytes<sup>9</sup>, while Tang et al. reported that retrotransposons were unchanged in the same mutants<sup>10</sup>. They examined fully grown oocytes and MII oocytes, respectively, and used beta-actin and Gapdh as an internal control, respectively. We used an external control to exclude the possible misinterpretation of the results due to a change in expression of the internal control transcripts by Dicer KO. In addition, we examined earlier stage (growing stage) oocytes to minimize the secondary effects caused by the mutation.

(a) Quantitative RT-PCR analysis of some retrotransposons in Dicer KO oocytes. Error bars represent S.E. (n=4). Oocytes that did not express Cre recombinase were used as controls. As an external control, a certain amount of EGFP mRNA was added per oocyte before isolation of total RNAs. The values were normalized by the relative level of EGFP mRNA. Note that small RNAs corresponding to GAPD were found in the oocyte small RNA library (data not shown).

(b) Quantitative RT-PCR analysis of some retrotransposons in Mili KO oocytes. Error bars represent S.E. (n=4). Mili +/- oocytes were used for controls. The values were normalized by the relative level of beta-actin mRNA.

## Supplementary Figure 7

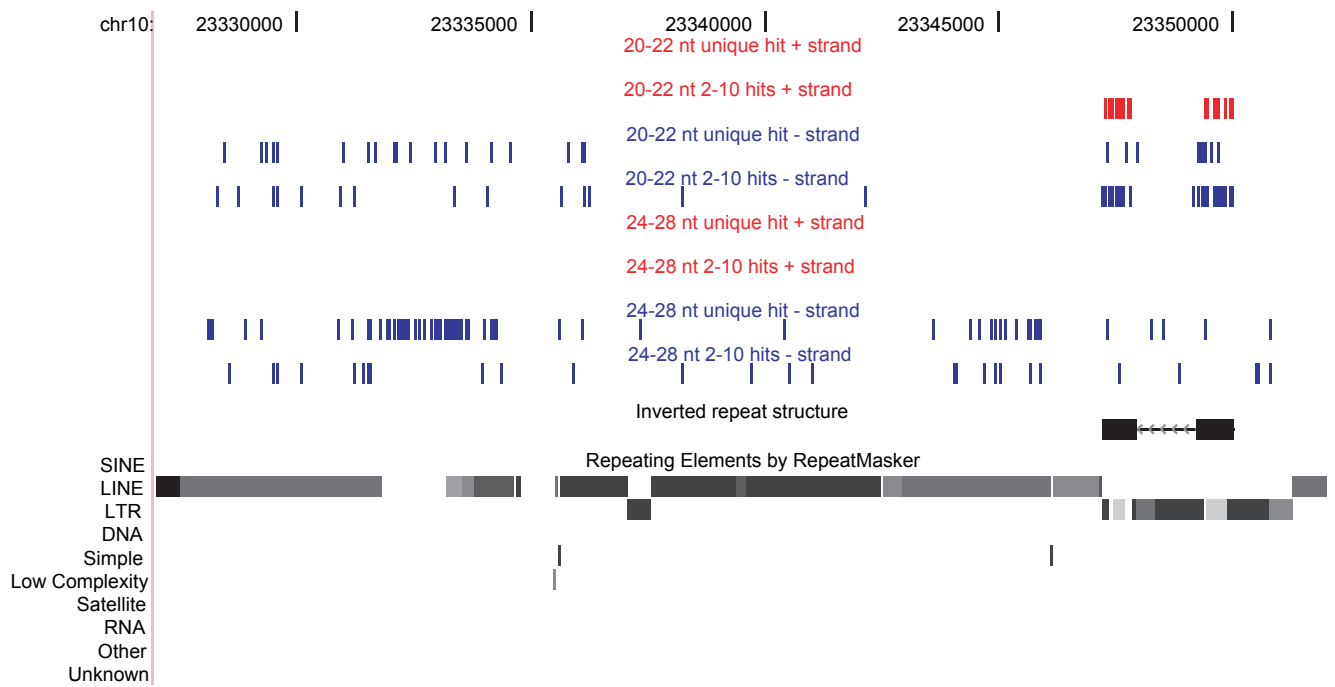

Supplementary Figure 7. A peculiar cluster in which both siRNAs and piRNAs are mapped. The small RNAs mapped in this region are represented by red (plus-strand) or blue (minus-strand) bars. Small RNAs that hit the genome only once and those that hit the genome 2-10 times are indicated in different rows. The thick black bars represent the inverted repeat structure that constitutes the stem of a hairpin predicted by Mfold. Repeat elements identified by RepeatMasker are also shown.

## Supplementary Figure 8

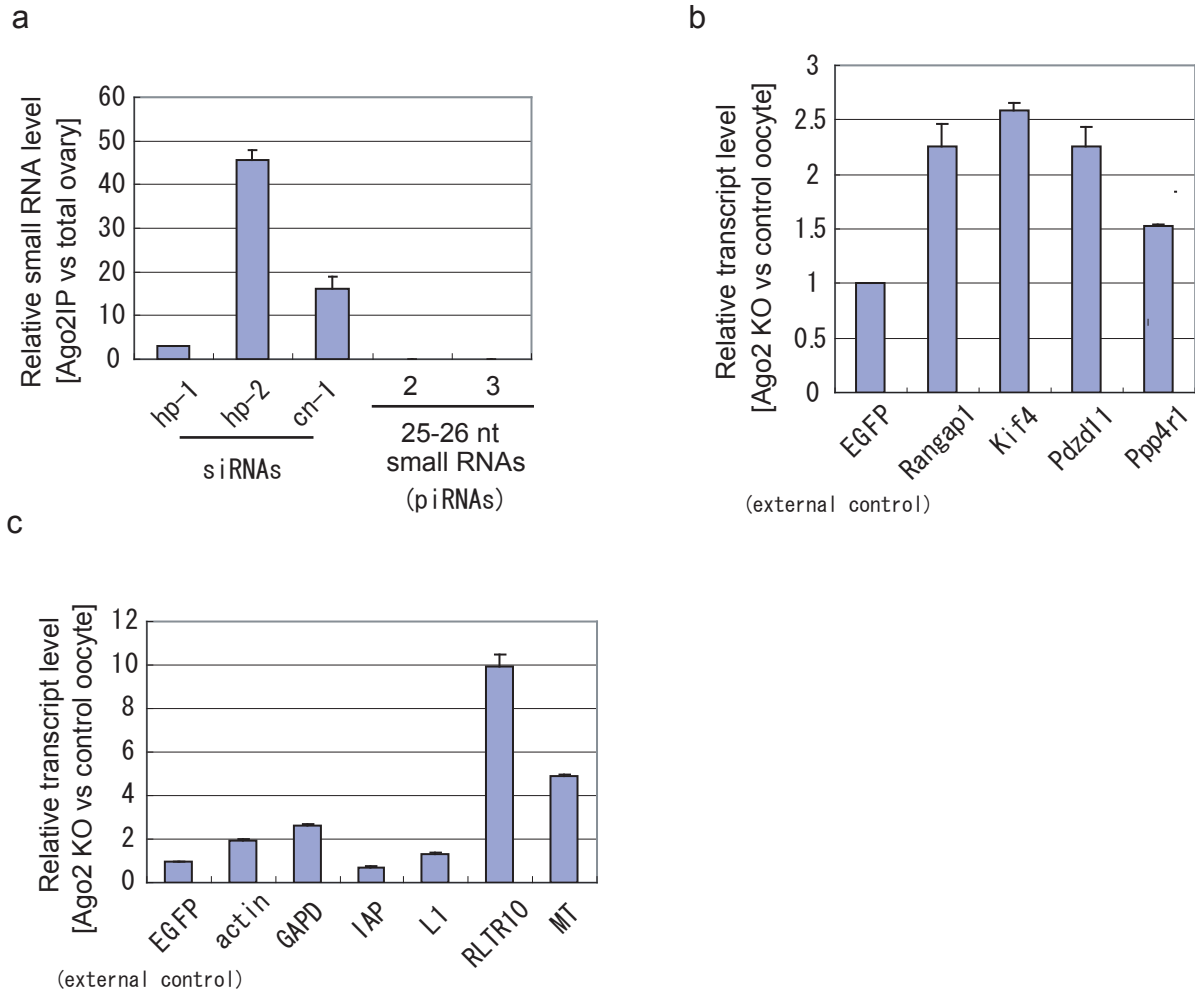

Supplementary Figure 8. Ago2-dependent regulation of mRNAs and retrotransposons by endogenous siRNAs.

(a) Quantitative RT-PCR analysis of selected endogenous siRNAs and piRNAs in total and Ago2-IP small RNAs from P8 ovaries. The amount of each RNA species in the Ago2-IP library was divided by that in the total small RNA library. Experiments were repeated three times. Some piRNAs were also tested but were undetectable in the Ago2-IP library. Amplified products were sequenced and confirmed to have the correct sequences. Error bars represent S.D. (n=3)

(b) Quantitative RT-PCR analysis of target mRNAs in Ago2 KO oocytes. Error bars represent S.E. (n=3). The amounts of EGFP (external control), Rangap1, Kif4, Pdzd11 and PPP4r1 mRNAs in conditional Ago2 KO oocytes were divided by those in oocytes that did not express Cre recombinase.

(c) Quantitative RT-PCR analysis of some retrotransposons in Ago2 KO oocytes. Error bars represent S.E. (n=3). The amounts of EGFP (external control), beta-actin and retrotransposons in conditional Ago2 KO oocytes were divided by those in oocytes that did not express Cre recombinase.

Supplementary Figure 9

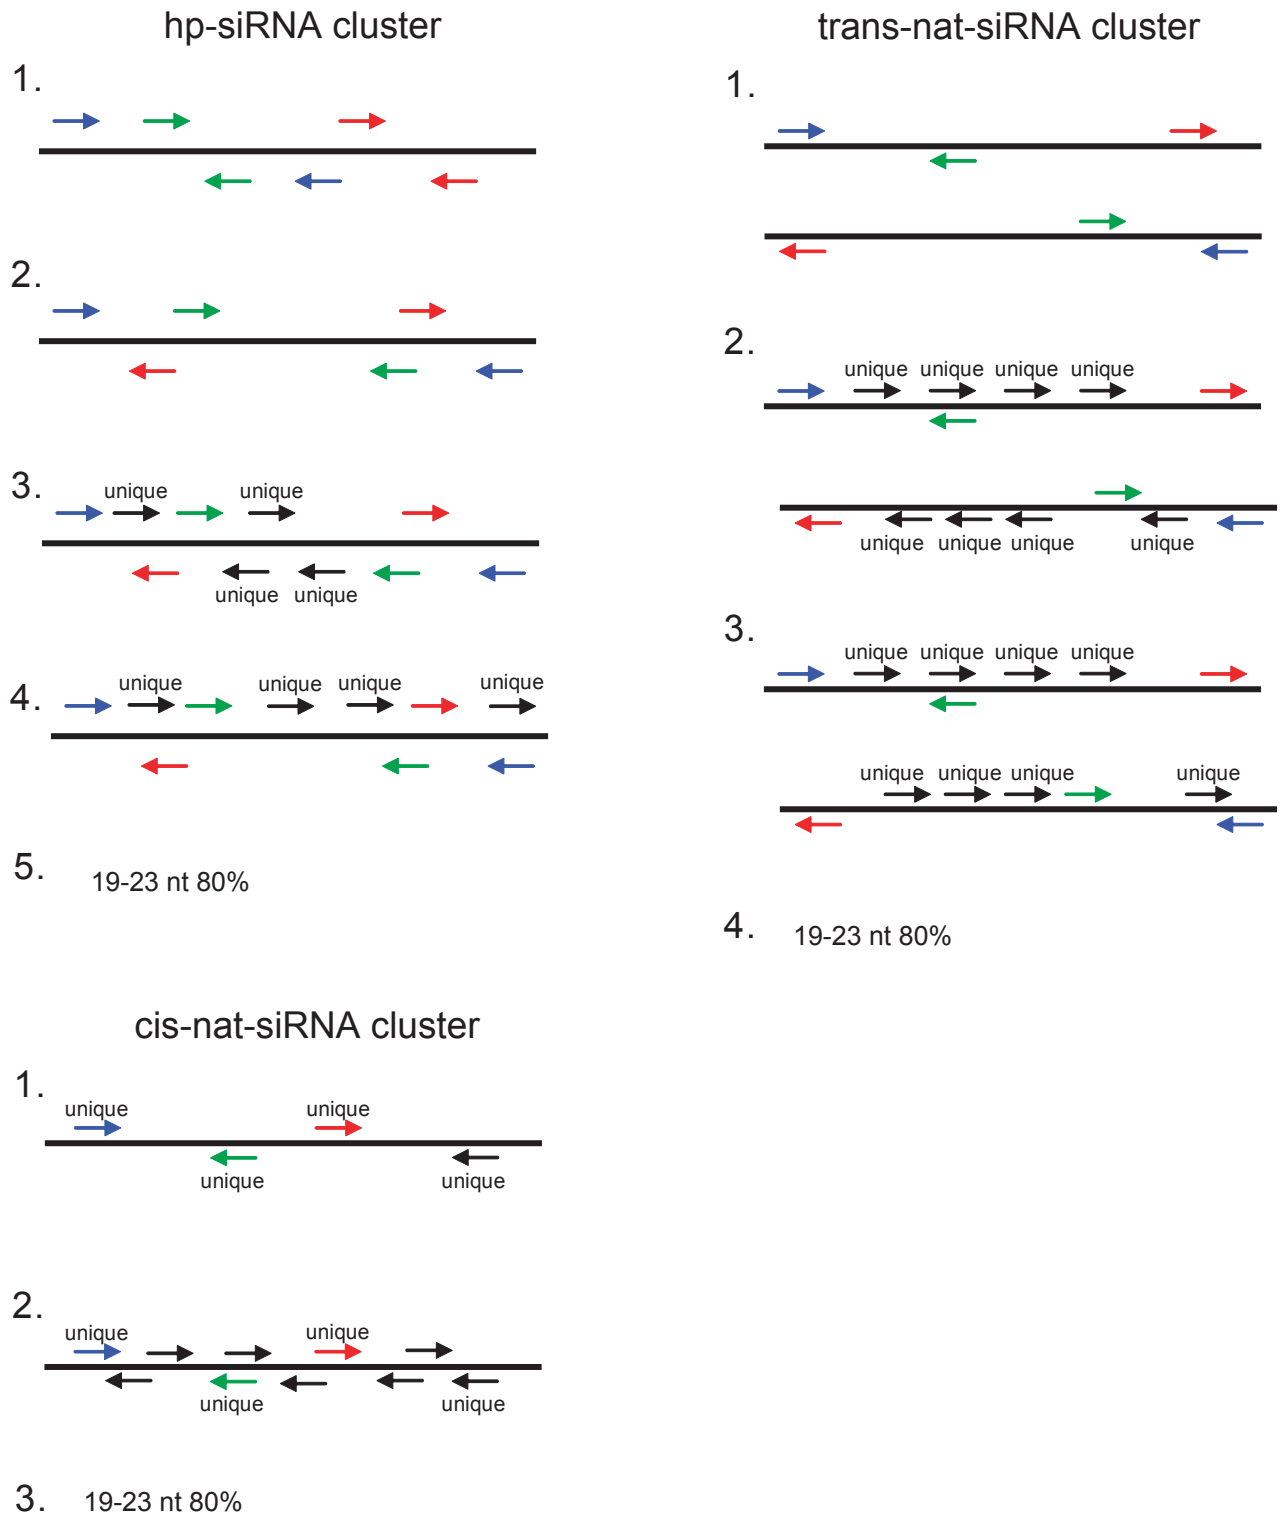

Supplementary Figure 9. Diagrams showing the type of clusters selected at each filtering step of the bioinformatics siRNA cluster selection.

Arrows indicate small RNAs mapped to the region. The homologous small RNAs in a cluster are indicated in the same color (blue, green and red arrows in hp-siRNA and trans-nat-siRNA clusters). The small RNAs that uniquely hit the genome are indicated as “unique” above the arrows.

## Supplementary Figure 10

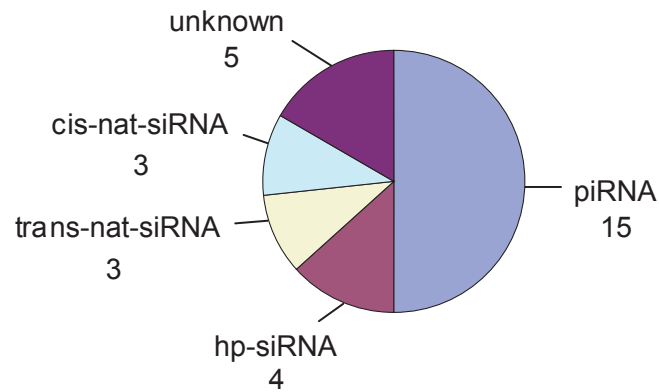

## Supplementary Figure 10. Classification of top 30 clusters.

The top 30 largest clusters, in terms of the number of small RNA species mapped within the respective cluster, are classified according to the class of small RNAs and the origin of siRNA precursors. When a cluster was annotated as both piRNA and siRNA clusters, we designated this cluster as an siRNA cluster. We analyzed only the top 30 largest clusters, because most of the smaller clusters did not meet the criteria due to the small number of unique small RNAs that constituted the clusters.

Supplementary Table 1. Annotation of small RNAs

| RNA class                    | No. of reads (%)    |                     |                     |                   |                      |                     |
|------------------------------|---------------------|---------------------|---------------------|-------------------|----------------------|---------------------|
|                              | oocyte total        | oocyte 20-<br>22 nt | oocyte 25-<br>27 nt | Mili IP           | Mili IP 20-<br>22 nt | Mili IP 25-27<br>nt |
| rRNA                         | 5047 (5)            | 1593 (3)            | 558 (2)             | 143 (3)           | 34 (7)               | 15 (0.8)            |
| tRNA                         | 3767 (4)            | 978 (2)             | 440 (2)             | 154 (4)           | 17 (3)               | 39 (2)              |
| sn_snoRNA                    | 395 (0.4)           | 128 (0.3)           | 59 (0.3)            | 21 (0.5)          | 3 (0.6)              | 2 (0.1)             |
| sc_srpRNA                    | 119 (0.1)           | 43 (0.1)            | 26 (0.1)            | 13 (0.3)          | 2 (0.4)              | 3 (0.2)             |
| miRNA                        | 3587 (3)            | 2815 (6)            | 1 (0)               | 34 (0.8)          | 25 (5)               | 0 (0)               |
| pachytene piRNA <sup>1</sup> | 104 (0.1)           | 50 (0.1)            | 20 (0.1)            | 8 (0.2)           | 0 (0)                | 6 (0.3)             |
| mRNA                         | 9420 (9)            | 4445 (11)           | 1872 (8)            | 609 (15)          | 80 (16)              | 284 (15)            |
| repeat                       | 74989 (72)          | 35488 (96)          | 18035 (77)          | 2362 (57)         | 272 (56)             | 1128 (80)           |
| unknown <sup>2</sup>         | 6567 (6)            | 1419 (3)            | 2482 (11)           | 785 (19)          | 55 (11)              | 403 (21)            |
| <b>total</b>                 | <b>103995 (100)</b> | <b>46959 (100)</b>  | <b>23493 (100)</b>  | <b>4129 (100)</b> | <b>488 (100)</b>     | <b>1880 (100)</b>   |

1 This class represents small RNAs that are annotated as piRNA in mouse adult testis.

2 This class represents small RNAs that are not classified in any other classes.

Supplementary Table 2. Annotation of repeat small RNAs

| class                      | subclass    | Number of clones (growing oocytes) |            |            |            | Number of clones (Milli IP) |          |            |            |            |            |
|----------------------------|-------------|------------------------------------|------------|------------|------------|-----------------------------|----------|------------|------------|------------|------------|
|                            |             | Total                              | 20-22 nt + | 20-22 nt - | 25-27 nt + | 25-27 nt -                  | Total    | 20-22 nt + | 20-22 nt - | 25-27 nt + | 25-27 nt - |
| DNA/MER1_type              | MER5A       | 6                                  |            |            |            | 1                           |          |            |            | 1          |            |
| DNA/MER1_type              | URR1A       | 6                                  |            |            |            | 3                           |          |            |            | 1          |            |
| DNA/MER1_type              | RCHARR1     | 4                                  |            |            |            | 3                           |          |            |            | 1          |            |
| DNA/MER1_type              | URR1B       | 4                                  |            |            | 1          | 2                           |          |            |            | 1          |            |
| DNA/MER1_type              | Charlie5    | 3                                  | 1          |            |            |                             |          |            |            |            |            |
| DNA/MER1_type              | RMER30      | 2                                  | 1          |            | 1          |                             |          |            |            |            |            |
| DNA/MER1_type              | Charlie8    | 1                                  |            |            |            |                             |          |            |            |            |            |
| DNA/MER1_type              | MER112      | 1                                  |            |            |            |                             |          |            |            |            |            |
| DNA/MER1_type              | MER20       | 1                                  | 1          |            |            |                             |          |            |            |            |            |
| DNA/MER1_type              | MER58B      | 1                                  |            |            | 1          |                             |          |            |            |            |            |
| DNA/MER1_type              | MER5A1      | 1                                  | 1          |            |            |                             |          |            |            |            |            |
| DNA/MER1_type              | MER5B       | 1                                  |            |            |            |                             |          |            |            | 1          |            |
| DNA/MER1_type              | Charlie1    |                                    |            |            |            |                             |          |            |            | 1          |            |
| DNA/MER1_type              | MER2        |                                    |            |            |            |                             |          |            |            | 1          |            |
| <b>DNA/MER1_type total</b> |             | <b>31</b>                          | <b>4</b>   | <b>0</b>   | <b>3</b>   | <b>9</b>                    | <b>7</b> | <b>0</b>   | <b>0</b>   | <b>1</b>   | <b>2</b>   |
| DNA/MER2_type              | MER44A      | 2                                  |            |            |            |                             |          |            |            |            |            |
| DNA/MER2_type              | MER82       | 2                                  |            |            |            |                             |          |            |            |            |            |
| DNA/MER2_type              | Tigger7     | 2                                  |            |            |            |                             |          |            |            |            |            |
| DNA/MER2_type              | MER2        | 1                                  |            |            | 1          |                             |          |            |            |            |            |
| DNA/MER2_type              | Tigger5     | 1                                  |            |            | 1          |                             |          |            |            |            |            |
| <b>DNA/MER2_type total</b> |             | <b>8</b>                           | <b>0</b>   | <b>0</b>   | <b>2</b>   | <b>0</b>                    | <b>0</b> | <b>0</b>   | <b>0</b>   | <b>0</b>   | <b>0</b>   |
| DNA/Tip100                 | Arthur1     | 1                                  |            |            |            |                             |          |            |            |            |            |
| DNA/Tip100                 | MER115      | 1                                  |            |            |            |                             |          |            |            |            |            |
| DNA/Tip100                 | FordPrefect |                                    |            |            |            |                             | 1        |            |            |            |            |
| <b>DNA/Tip100 total</b>    |             | <b>2</b>                           | <b>0</b>   | <b>0</b>   | <b>0</b>   | <b>0</b>                    | <b>1</b> | <b>0</b>   | <b>0</b>   | <b>0</b>   | <b>0</b>   |
| LINE/CR1                   | L3          | 4                                  |            |            | 1          |                             |          |            |            |            |            |
| LINE/CR1                   | L3_Mars     | 3                                  |            |            | 2          |                             |          |            |            |            |            |
| LINE/CR1                   | L3b         | 1                                  |            |            |            |                             |          |            |            |            |            |
| <b>LINE/CR1 total</b>      |             | <b>8</b>                           | <b>0</b>   | <b>0</b>   | <b>3</b>   | <b>0</b>                    | <b>0</b> | <b>0</b>   | <b>0</b>   | <b>0</b>   | <b>0</b>   |
| LINE/L1                    | L1Md_F2     | 7100                               | 1123       | 1445       | 718        | 1431                        | 161      | 10         | 22         | 19         | 44         |
| LINE/L1                    | L1Md_A      | 2640                               | 539        | 487        | 427        | 352                         | 111      | 10         | 2          | 23         | 33         |
| LINE/L1                    | L1Md_T      | 2408                               | 381        | 618        | 393        | 315                         | 79       | 6          | 8          | 15         | 21         |
| LINE/L1                    | L1Md_Gf     | 949                                | 254        | 261        | 123        | 37                          | 38       | 1          | 3          | 9          | 3          |
| LINE/L1                    | L1_Mus1     | 783                                | 110        | 73         | 136        | 206                         | 33       |            |            | 3          | 10         |
| LINE/L1                    | L1Md_F      | 751                                | 82         | 147        | 78         | 207                         | 31       | 1          | 2          | 2          | 13         |
| LINE/L1                    | L1_Mus2     | 496                                | 31         | 53         | 62         | 194                         | 30       |            |            | 1          | 17         |
| LINE/L1                    | L1Md_F3     | 393                                | 35         | 61         | 43         | 110                         | 9        | 1          |            | 3          | 2          |
| LINE/L1                    | L1_Mus3     | 353                                | 37         | 48         | 54         | 83                          | 10       |            | 2          | 3          | 1          |
| LINE/L1                    | Lx          | 183                                | 14         | 16         | 31         | 64                          | 5        |            |            |            | 2          |
| LINE/L1                    | L1_Mm       | 125                                | 8          | 20         | 13         | 51                          | 5        |            |            |            | 4          |
| LINE/L1                    | Lx8         | 79                                 | 2          | 5          | 4          | 8                           | 11       |            |            | 2          | 2          |
| LINE/L1                    | L1_Mur1     | 41                                 | 1          |            | 1          | 25                          | 1        | 1          |            |            |            |
| LINE/L1                    | MusHAL1     | 38                                 | 2          | 4          | 3          | 8                           | 5        |            |            | 1          | 2          |
| LINE/L1                    | Lx5         | 36                                 | 3          | 3          | 12         | 3                           | 5        | 1          |            | 1          |            |
| LINE/L1                    | L1_Mus4     | 35                                 | 4          | 5          | 10         | 6                           | 2        |            |            | 1          |            |
| LINE/L1                    | L1VL1       | 32                                 | 10         | 2          | 9          | 6                           | 1        |            |            | 1          |            |
| LINE/L1                    | L1VL2       | 32                                 | 10         |            | 7          | 4                           | 5        |            |            | 1          | 2          |
| LINE/L1                    | L1_Mur3     | 30                                 | 1          | 2          |            | 6                           | 3        |            |            |            | 1          |
| LINE/L1                    | L1VL4       | 29                                 | 6          | 2          | 3          | 5                           | 2        |            |            | 1          |            |
| LINE/L1                    | L1_Mur2     | 28                                 | 1          |            | 9          | 5                           | 1        |            |            |            |            |
| LINE/L1                    | Lx3_Mus     | 22                                 | 7          | 1          | 3          | 5                           | 3        |            | 2          |            |            |
| LINE/L1                    | Lx2         | 21                                 | 1          | 2          | 4          | 3                           | 2        |            |            | 1          |            |
| LINE/L1                    | Lx9         | 20                                 | 2          | 1          | 2          | 4                           |          |            |            |            |            |
| LINE/L1                    | L1_Rod      | 18                                 |            |            |            |                             | 1        |            |            |            | 1          |
| LINE/L1                    | Lx2B        | 17                                 | 1          | 2          | 2          | 1                           |          |            |            |            |            |
| LINE/L1                    | Lx4B        | 14                                 |            |            |            |                             |          |            |            |            |            |
| LINE/L1                    | Lx7         | 14                                 | 2          | 1          | 2          | 1                           | 1        |            |            |            |            |
| LINE/L1                    | Lx4A        | 11                                 |            |            | 2          |                             |          |            |            |            |            |
| LINE/L1                    | L1M5        | 10                                 |            | 3          |            |                             |          |            |            |            |            |
| LINE/L1                    | Lx6         | 10                                 | 1          | 1          | 2          | 2                           |          |            |            |            |            |
| LINE/L1                    | L1M2        | 9                                  |            | 1          | 1          | 3                           |          |            |            |            |            |
| LINE/L1                    | Lx2A1       | 8                                  |            |            |            | 2                           |          |            |            |            |            |
| LINE/L1                    | Lx3B        | 8                                  | 1          | 1          | 1          |                             |          |            |            |            |            |
| LINE/L1                    | Lx3A        | 7                                  | 1          |            | 2          |                             |          |            |            |            |            |
| LINE/L1                    | Lx3C        | 7                                  |            | 1          |            | 1                           | 1        |            |            |            |            |
| LINE/L1                    | L1MA8       | 4                                  |            |            | 1          | 2                           |          |            |            |            |            |
| LINE/L1                    | L1MCA       | 4                                  |            |            |            | 2                           |          |            |            |            |            |
| LINE/L1                    | L1MA6       | 3                                  |            |            | 1          | 1                           | 1        |            |            |            |            |

|                             |               |              |             |             |             |             |            |           |           |           |            |
|-----------------------------|---------------|--------------|-------------|-------------|-------------|-------------|------------|-----------|-----------|-----------|------------|
| LINE/L1                     | L1MCb         | 3            |             |             |             |             |            |           |           |           |            |
| LINE/L1                     | L1MD          | 3            |             |             |             | 1           |            | 1         |           | 1         |            |
| LINE/L1                     | L1M3          | 2            |             |             |             |             |            | 1         |           |           |            |
| LINE/L1                     | L1M4          | 2            |             |             | 1           |             |            |           |           |           |            |
| LINE/L1                     | L1MA4         | 2            |             |             |             |             |            |           |           |           |            |
| LINE/L1                     | L1MB4         | 2            |             |             | 1           |             |            |           |           |           |            |
| LINE/L1                     | L1MDa         | 2            |             |             |             |             |            |           |           |           |            |
| LINE/L1                     | L1ME1         | 2            |             |             | 2           |             |            |           |           |           |            |
| LINE/L1                     | L1MEe         | 2            | 1           |             |             |             |            |           |           |           |            |
| LINE/L1                     | L1M           | 1            |             |             |             | 1           |            |           |           |           |            |
| LINE/L1                     | L1M4c         | 1            |             |             |             |             |            |           |           |           |            |
| LINE/L1                     | L1MA5         | 1            |             |             |             | 1           |            |           |           |           |            |
| LINE/L1                     | L1MA5A        | 1            |             |             |             |             |            |           |           |           |            |
| LINE/L1                     | L1MA7         | 1            |             |             |             |             |            |           |           |           |            |
| LINE/L1                     | L1MB5         | 1            |             |             |             |             |            |           |           |           |            |
| LINE/L1                     | L1MB7         | 1            |             |             |             |             |            |           |           |           |            |
| LINE/L1                     | L1MC          | 1            |             |             |             |             |            |           |           |           |            |
| LINE/L1                     | L1MC4         | 1            |             |             | 1           |             |            |           |           |           |            |
| LINE/L1                     | L1MD2         | 1            |             |             |             |             |            |           |           |           |            |
| LINE/L1                     | L1ME3         | 1            |             |             |             |             |            |           |           |           |            |
| LINE/L1                     | L1ME3B        | 1            |             |             |             |             |            |           |           |           |            |
| LINE/L1                     | Lx2A          | 1            | 1           |             |             |             |            |           |           |           |            |
| LINE/L1                     | L1MB3         |              |             |             |             |             |            | 2         |           |           |            |
| <b>LINE/L1 total</b>        |               | <b>16801</b> | <b>2672</b> | <b>3266</b> | <b>2164</b> | <b>3156</b> | <b>561</b> | <b>32</b> | <b>41</b> | <b>87</b> | <b>158</b> |
| LINE/L2                     | L2            | 39           | 16          | 1           | 6           | 4           | 2          | 1         | 1         |           |            |
| <b>LINE/L2 total</b>        |               | <b>39</b>    | <b>16</b>   | <b>1</b>    | <b>6</b>    | <b>4</b>    | <b>2</b>   | <b>1</b>  | <b>1</b>  | <b>0</b>  | <b>0</b>   |
| LINE/RTE                    | L4            |              |             |             |             |             | 1          |           |           |           | 1          |
| <b>LINE/RTE total</b>       |               | <b>0</b>     | <b>0</b>    | <b>0</b>    | <b>0</b>    | <b>0</b>    | <b>1</b>   | <b>0</b>  | <b>0</b>  | <b>0</b>  | <b>1</b>   |
| Low_complexity              | CT-rich       | 15           | 1           |             |             | 2           |            |           |           |           |            |
| Low_complexity              | G-rich        | 12           | 3           | 4           |             |             |            |           |           |           |            |
| Low_complexity              | GA-rich       | 10           |             | 1           |             |             | 1          |           |           | 1         |            |
| Low_complexity              | GC-rich       | 9            | 1           | 5           |             | 1           |            |           |           |           |            |
| Low_complexity              | C-rich        | 7            | 2           | 1           |             |             |            |           |           |           |            |
| Low_complexity              | AT-rich       | 3            |             |             |             | 1           |            |           |           |           |            |
| <b>Low_complexity total</b> |               | <b>56</b>    | <b>7</b>    | <b>11</b>   | <b>0</b>    | <b>4</b>    | <b>1</b>   | <b>0</b>  | <b>0</b>  | <b>1</b>  | <b>0</b>   |
| LTR/ERV1                    | LTRIS_Mm      | 2590         | 883         | 969         | 32          | 88          | 11         |           | 1         |           | 3          |
| LTR/ERV1                    | LTRIS_Mm-int  | 1806         | 358         | 390         | 152         | 367         | 47         |           | 2         |           | 22         |
| LTR/ERV1                    | LTRIS_Mus     | 1001         | 389         | 298         | 41          | 35          | 5          | 1         | 1         |           | 1          |
| LTR/ERV1                    | LTRIS_Mus-int | 623          | 63          | 121         | 25          | 273         | 5          | 1         |           |           | 3          |
| LTR/ERV1                    | RLTR6_Mm      | 271          |             | 2           |             |             |            |           |           |           |            |
| LTR/ERV1                    | RLTR6_Mm-int  | 217          | 1           | 15          | 4           | 104         | 13         | 1         | 2         |           | 4          |
| LTR/ERV1                    | RLTR5_Mm-int  | 173          | 1           | 11          |             | 100         | 10         |           |           |           | 5          |
| LTR/ERV1                    | MuRRS-int     | 88           | 16          | 14          | 4           | 24          |            |           |           |           |            |
| LTR/ERV1                    | MURVY-LTR     | 78           |             | 11          |             | 35          | 12         |           | 1         |           | 8          |
| LTR/ERV1                    | MuRRS4-int    | 69           | 12          | 11          | 9           | 17          | 2          |           |           |           |            |
| LTR/ERV1                    | MURVY-int     | 58           |             | 8           | 11          | 27          | 11         |           | 2         | 3         | 3          |
| LTR/ERV1                    | RLTR5_Mm      | 52           |             | 10          |             | 21          | 8          |           |           |           | 2          |
| LTR/ERV1                    | LTRIS2        | 43           |             | 23          |             | 14          | 1          |           |           |           | 1          |
| LTR/ERV1                    | RLTR4_Mm-int  | 38           | 7           | 1           | 17          | 1           | 3          |           |           | 3         |            |
| LTR/ERV1                    | RodERV21      | 37           |             | 5           |             | 15          | 3          |           |           | 1         |            |
| LTR/ERV1                    | RLTR1B        | 26           | 2           | 2           |             | 16          | 7          |           |           |           | 4          |
| LTR/ERV1                    | RLTR14-int    | 24           | 1           |             | 12          | 9           | 1          |           |           | 1         |            |
| LTR/ERV1                    | RLTR6-int     | 22           |             | 2           |             | 16          | 2          |           |           |           |            |
| LTR/ERV1                    | MMERGLN-int   | 16           |             | 4           |             | 5           | 5          |           |           |           | 4          |
| LTR/ERV1                    | RLTR1B-int    | 14           | 1           | 2           | 4           | 1           |            |           |           |           |            |
| LTR/ERV1                    | LTRIS2-int    | 7            |             |             |             |             |            |           |           |           |            |
| LTR/ERV1                    | RLTR4_Mm      | 7            | 5           | 1           |             |             |            |           |           |           |            |
| LTR/ERV1                    | RMER2         | 6            | 1           |             | 1           | 2           |            |           |           |           |            |
| LTR/ERV1                    | MMVL30-int    | 5            |             |             | 1           | 2           | 4          |           |           |           | 2          |
| LTR/ERV1                    | LTRIS4-int    | 4            |             | 3           |             | 1           |            |           |           |           |            |
| LTR/ERV1                    | MER52-int     | 4            |             | 1           |             | 2           |            |           |           |           |            |
| LTR/ERV1                    | MuLV-int      | 4            |             |             | 2           |             |            |           |           |           |            |
| LTR/ERV1                    | MER21B        | 3            |             |             |             |             | 2          |           |           |           | 2          |
| LTR/ERV1                    | RLTR23        | 3            |             | 1           |             | 1           |            |           |           |           |            |
| LTR/ERV1                    | LTR37B-int    | 2            | 2           |             |             |             |            |           |           |           |            |
| LTR/ERV1                    | LTRIS3        | 2            |             |             | 1           |             |            |           |           |           |            |
| LTR/ERV1                    | RLTR1         | 2            |             |             |             |             |            |           |           |           |            |
| LTR/ERV1                    | RMER5         | 2            |             |             | 1           |             | 1          |           |           |           |            |
| LTR/ERV1                    | LTRIS4        | 1            |             | 1           |             |             |            |           |           |           |            |
| LTR/ERV1                    | MER31-int     | 1            |             |             | 1           |             |            |           |           |           |            |
| LTR/ERV1                    | RLTR14        | 1            |             |             |             | 1           |            |           |           |           |            |



|                       |                 |             |             |             |            |             |            |          |          |           |           |  |
|-----------------------|-----------------|-------------|-------------|-------------|------------|-------------|------------|----------|----------|-----------|-----------|--|
| LTR/ERV1              | RLTR1C          | 1           |             |             |            | 1           |            |          |          |           |           |  |
| LTR/ERV1              | RLTR1D-int      | 1           |             |             |            |             |            |          |          |           |           |  |
| LTR/ERV1              | RMER21B         | 1           |             |             |            |             | 1          |          |          | 1         |           |  |
| LTR/ERV1              | RMER5-int       | 1           | 1           |             |            |             |            |          |          |           |           |  |
| LTR/ERV1              | MER67B          |             |             |             |            |             | 1          |          |          | 1         |           |  |
| LTR/ERV1              | RLTR24          |             |             |             |            |             | 1          |          |          | 1         |           |  |
| <b>LTR/ERV1 total</b> |                 | <b>7304</b> | <b>1742</b> | <b>1907</b> | <b>318</b> | <b>1178</b> | <b>156</b> | <b>3</b> | <b>9</b> | <b>11</b> | <b>64</b> |  |
| LTR/ERVK              | RLTR10-int      | 4557        | 1238        | 551         | 1192       | 138         | 256        | 23       | 7        | 118       | 12        |  |
| LTR/ERVK              | IAPLTR1a_Mm-int | 4021        | 914         | 598         | 1228       | 123         | 123        | 9        | 8        | 44        | 10        |  |
| LTR/ERVK              | IAPLTR1_Mm-int  | 2910        | 698         | 287         | 975        | 66          | 200        | 22       | 5        | 102       | 2         |  |
| LTR/ERVK              | RLTR10          | 1679        | 446         | 309         | 351        | 71          | 63         | 5        | 5        | 31        | 2         |  |
| LTR/ERVK              | MMERVK10C       | 1140        | 333         | 199         | 170        | 151         | 73         | 2        | 2        | 12        | 23        |  |
| LTR/ERVK              | IAP-d           | 606         | 113         | 176         | 55         | 92          | 35         | 1        | 3        | 1         | 14        |  |
| LTR/ERVK              | IAPLTR2_Mm-int  | 603         | 62          | 156         | 105        | 99          | 24         |          | 2        | 7         | 7         |  |
| LTR/ERVK              | IAPLTR2_Mm      | 462         | 53          | 115         | 39         | 118         | 16         |          |          | 3         | 4         |  |
| LTR/ERVK              | RLTR10A         | 390         | 37          | 136         | 25         | 36          | 9          | 1        | 1        |           | 2         |  |
| LTR/ERVK              | RLTRETN_Mm-int  | 367         | 40          | 54          | 45         | 102         | 34         | 1        | 3        | 6         | 15        |  |
| LTR/ERVK              | IAPEz-int       | 342         | 72          | 70          | 71         | 24          | 14         |          |          | 5         | 7         |  |
| LTR/ERVK              | IAPLTR1_Mm      | 334         | 79          | 76          | 54         | 15          | 15         | 1        |          | 8         | 1         |  |
| LTR/ERVK              | RMER17A2        | 314         | 27          | 26          | 70         | 59          | 20         | 2        | 1        | 4         | 6         |  |
| LTR/ERVK              | RLTR10B2        | 283         | 4           | 58          | 1          | 143         | 14         |          | 3        |           | 6         |  |
| LTR/ERVK              | RLTR10A-int     | 222         | 47          | 47          | 43         | 24          | 10         | 3        | 1        | 2         |           |  |
| LTR/ERVK              | IAPLTR1a_Mm     | 221         | 50          | 27          | 44         | 14          | 5          |          | 1        | 2         | 2         |  |
| LTR/ERVK              | RLTRETN_Mm      | 207         | 22          | 41          | 4          | 57          | 14         |          | 2        | 1         | 5         |  |
| LTR/ERVK              | ETnERV          | 204         | 15          | 35          | 11         | 63          | 30         |          |          |           | 19        |  |
| LTR/ERVK              | IAPEY3-int      | 190         | 15          | 23          | 25         | 68          | 13         |          | 2        |           | 5         |  |
| LTR/ERVK              | IAPLTR2b-int    | 172         | 19          | 57          | 18         | 28          | 6          | 1        | 1        |           | 4         |  |
| LTR/ERVK              | RLTR27          | 132         | 1           | 13          |            | 78          | 7          |          | 1        |           | 5         |  |
| LTR/ERVK              | RLTR22_Mus      | 118         | 18          | 12          | 49         | 8           | 19         |          | 1        | 6         | 4         |  |
| LTR/ERVK              | MERVK26         | 112         |             | 17          |            | 45          | 10         |          |          |           | 6         |  |
| LTR/ERVK              | RLTR10C         | 111         | 16          | 28          | 5          | 22          | 3          |          |          | 1         |           |  |
| LTR/ERVK              | RMER19A         | 110         | 12          |             | 52         | 1           | 5          |          |          | 4         |           |  |
| LTR/ERVK              | RLTR9E          | 76          | 1           | 10          | 1          | 36          | 9          |          | 2        |           | 5         |  |
| LTR/ERVK              | RLTR13B1        | 65          | 2           | 10          |            | 25          | 9          |          |          |           | 6         |  |
| LTR/ERVK              | MurERV4         | 61          |             | 16          |            | 30          | 10         |          | 1        |           | 4         |  |
| LTR/ERVK              | RLTR13D5        | 54          |             | 5           | 1          | 34          | 9          |          |          |           | 7         |  |
| LTR/ERVK              | ETnERV2         | 51          | 1           | 6           | 7          | 18          | 7          | 1        |          |           | 3         |  |
| LTR/ERVK              | RMER17B         | 50          |             | 9           | 4          | 22          | 6          |          |          |           | 4         |  |
| LTR/ERVK              | RLTR10D         | 48          | 1           | 6           |            | 28          | 6          |          |          |           | 2         |  |
| LTR/ERVK              | IAPEY_LTR-int   | 44          | 1           | 7           | 3          | 21          | 10         | 1        |          |           | 5         |  |
| LTR/ERVK              | RMER4B          | 44          | 28          | 6           |            | 4           |            |          |          |           |           |  |
| LTR/ERVK              | MurERV4_19      | 39          | 4           |             | 17         |             |            |          |          |           |           |  |
| LTR/ERVK              | RLTR9A          | 38          |             | 3           |            | 20          | 10         |          | 1        |           | 7         |  |
| LTR/ERVK              | IAPLTR2b        | 34          | 3           | 7           | 4          | 5           | 3          | 1        |          |           |           |  |
| LTR/ERVK              | RLTR19-int      | 33          | 4           |             | 16         |             | 4          |          |          | 2         |           |  |
| LTR/ERVK              | IAPLTR2a-int    | 29          | 6           | 7           | 5          | 1           | 1          |          |          | 1         |           |  |
| LTR/ERVK              | RMER4A          | 29          | 22          | 1           | 2          |             |            |          |          |           |           |  |
| LTR/ERVK              | RLTR22_Mur      | 28          | 1           | 3           | 15         | 2           |            |          |          |           |           |  |
| LTR/ERVK              | RLTR44E         | 26          |             | 3           |            | 18          | 4          |          |          |           | 4         |  |
| LTR/ERVK              | IAPLTR4_I       | 25          |             | 11          |            | 6           | 1          |          | 1        |           |           |  |
| LTR/ERVK              | IAPLTR3-int     | 24          | 2           | 3           |            | 6           | 6          |          | 1        |           | 1         |  |
| LTR/ERVK              | RMER16          | 24          |             | 7           |            | 10          | 3          |          |          |           | 2         |  |
| LTR/ERVK              | RMER19B         | 22          | 6           |             | 6          | 3           | 3          |          |          | 1         |           |  |
| LTR/ERVK              | RLTR45          | 20          |             | 1           |            | 11          |            |          |          |           |           |  |
| LTR/ERVK              | RLTR9D          | 19          | 1           | 3           |            | 7           | 1          |          |          |           |           |  |
| LTR/ERVK              | RLTR21          | 18          |             | 1           |            | 10          | 2          |          |          |           |           |  |
| LTR/ERVK              | RMER16-int      | 17          | 1           | 2           | 2          | 5           | 3          |          |          |           | 1         |  |
| LTR/ERVK              | IAPEY3_LTR      | 15          | 2           | 6           |            | 3           | 1          |          |          |           | 1         |  |
| LTR/ERVK              | IAPEY2_LTR-int  | 14          |             | 3           |            | 9           | 4          |          |          |           | 3         |  |
| LTR/ERVK              | RLTR13A3        | 14          | 1           | 1           |            | 8           |            |          |          |           |           |  |
| LTR/ERVK              | RLTR45-int      | 13          | 1           |             | 4          | 3           |            |          |          |           |           |  |
| LTR/ERVK              | MMETn-int       | 11          | 1           | 3           | 1          | 5           |            |          |          |           |           |  |
| LTR/ERVK              | BGLII_B         | 10          | 1           |             |            | 5           | 3          |          |          |           | 2         |  |
| LTR/ERVK              | IAPEY2_LTR      | 10          |             |             |            | 4           | 1          |          |          |           |           |  |
| LTR/ERVK              | IAPEY3_LTR-int  | 10          | 2           | 1           | 1          | 2           | 4          |          | 1        |           | 2         |  |
| LTR/ERVK              | IAPLTR2a        | 10          | 1           | 3           | 1          | 3           |            |          |          |           |           |  |
| LTR/ERVK              | RLTR10E         | 10          | 1           |             |            | 6           | 1          |          |          |           | 1         |  |
| LTR/ERVK              | RMER17A         | 10          |             | 2           |            | 4           |            |          |          |           |           |  |
| LTR/ERVK              | RLTR16          | 9           |             |             | 1          |             |            |          |          |           |           |  |
| LTR/ERVK              | RMER17D         | 9           | 1           |             | 2          | 3           |            |          |          |           |           |  |
| LTR/ERVK              | RMER19C         | 9           | 1           |             | 3          | 1           | 2          | 1        |          | 1         |           |  |

|          |              |   |   |   |   |   |   |  |   |
|----------|--------------|---|---|---|---|---|---|--|---|
| LTR/ERVK | MYSERV       | 8 | 2 | 4 |   |   |   |  |   |
| LTR/ERVK | IAPLTR3      | 7 | 3 | 2 | 1 |   |   |  |   |
| LTR/ERVK | MYSERV16_I   | 7 | 1 | 3 |   |   |   |  |   |
| LTR/ERVK | RLTR8        | 7 | 4 |   |   | 2 |   |  |   |
| LTR/ERVK | RMER13B      | 7 |   | 2 | 1 |   |   |  |   |
| LTR/ERVK | ETnERV3      | 6 |   | 1 | 1 |   |   |  |   |
| LTR/ERVK | IAPLTR4-int  | 6 | 4 | 1 |   |   |   |  |   |
| LTR/ERVK | MYSERV6      | 6 | 1 | 1 |   |   | 1 |  |   |
| LTR/ERVK | RLTR17       | 6 |   | 1 | 1 |   |   |  |   |
| LTR/ERVK | RMER17C      | 6 | 2 | 1 |   | 1 |   |  |   |
| LTR/ERVK | BGLII        | 5 | 3 | 1 |   |   |   |  |   |
| LTR/ERVK | RLTR13B4     | 5 |   | 1 | 3 |   |   |  |   |
| LTR/ERVK | RLTR13D6     | 5 | 1 | 1 | 1 |   | 2 |  | 2 |
| LTR/ERVK | RLTR44-int   | 5 |   |   | 1 |   |   |  |   |
| LTR/ERVK | RMER20B      | 5 |   | 1 | 1 |   |   |  |   |
| LTR/ERVK | IAPLTR4      | 4 |   | 1 | 1 | 1 |   |  |   |
| LTR/ERVK | RLTR13C2     | 4 | 1 | 2 |   | 1 | 1 |  | 1 |
| LTR/ERVK | RLTR15       | 4 |   |   | 1 |   |   |  |   |
| LTR/ERVK | RLTR25A      | 4 |   |   | 2 |   |   |  |   |
| LTR/ERVK | RLTR27-int   | 4 |   | 1 | 1 |   |   |  |   |
| LTR/ERVK | RLTR42-int   | 4 | 1 |   | 2 | 1 | 1 |  |   |
| LTR/ERVK | RLTR44A-int  | 4 | 1 |   |   | 2 |   |  |   |
| LTR/ERVK | RLTR44C      | 4 |   | 1 |   |   |   |  |   |
| LTR/ERVK | RLTR46-int   | 4 | 3 | 1 |   |   | 1 |  |   |
| LTR/ERVK | RMER12       | 4 | 1 |   | 2 |   |   |  |   |
| LTR/ERVK | RMER13A      | 4 | 1 |   |   |   | 1 |  | 1 |
| LTR/ERVK | RMER17D2     | 4 |   | 1 |   | 3 | 1 |  | 1 |
| LTR/ERVK | RMER6D       | 4 | 4 |   |   |   |   |  |   |
| LTR/ERVK | RLTR12B      | 3 |   |   | 1 |   |   |  |   |
| LTR/ERVK | RLTR13A2     | 3 |   |   |   | 1 |   |  |   |
| LTR/ERVK | RLTR20A2     | 3 |   |   |   |   |   |  |   |
| LTR/ERVK | RLTR25B      | 3 |   | 1 |   |   |   |  |   |
| LTR/ERVK | RLTR31B_Mm   | 3 | 1 |   | 1 |   |   |  |   |
| LTR/ERVK | BGLII-int    | 2 |   |   |   |   |   |  |   |
| LTR/ERVK | RLTR12A      | 2 |   |   |   |   |   |  |   |
| LTR/ERVK | RLTR13D1     | 2 |   |   |   |   | 2 |  |   |
| LTR/ERVK | RLTR19       | 2 |   |   |   |   |   |  |   |
| LTR/ERVK | RLTR20A      | 2 |   |   | 1 |   |   |  |   |
| LTR/ERVK | RLTR20B3     | 2 | 1 |   |   |   |   |  |   |
| LTR/ERVK | RLTR31A_Mm   | 2 | 1 |   |   |   |   |  |   |
| LTR/ERVK | RLTR3_Mm-int | 2 |   | 1 |   |   |   |  |   |
| LTR/ERVK | RLTR44B      | 2 |   |   |   | 1 |   |  |   |
| LTR/ERVK | RLTR44E-int  | 2 |   |   |   |   | 1 |  | 1 |
| LTR/ERVK | RLTR9C       | 2 |   |   | 1 |   |   |  |   |
| LTR/ERVK | RNERVK23     | 2 |   |   | 1 |   |   |  |   |
| LTR/ERVK | BGLII_A      | 1 |   |   |   |   |   |  |   |
| LTR/ERVK | BGLII_B-int  | 1 |   |   |   |   |   |  |   |
| LTR/ERVK | BGLII_Mus    | 1 |   |   | 1 |   |   |  |   |
| LTR/ERVK | RLTR10B      | 1 |   |   |   |   |   |  |   |
| LTR/ERVK | RLTR11A      | 1 | 1 |   |   |   |   |  |   |
| LTR/ERVK | RLTR11B      | 1 |   |   |   |   | 1 |  | 1 |
| LTR/ERVK | RLTR13A      | 1 |   |   |   | 1 |   |  |   |
| LTR/ERVK | RLTR13B2     | 1 |   |   |   |   |   |  |   |
| LTR/ERVK | RLTR13D3     | 1 |   |   |   |   |   |  |   |
| LTR/ERVK | RLTR13D4     | 1 |   |   |   |   |   |  |   |
| LTR/ERVK | RLTR19B      | 1 |   |   |   |   |   |  |   |
| LTR/ERVK | RLTR20A1     | 1 |   |   | 1 |   |   |  |   |
| LTR/ERVK | RLTR20D      | 1 |   |   |   |   | 1 |  | 1 |
| LTR/ERVK | RLTR26       | 1 |   |   |   | 1 |   |  |   |
| LTR/ERVK | RLTR31_Mur   | 1 |   |   |   |   |   |  |   |
| LTR/ERVK | RLTR42       | 1 |   |   |   |   |   |  |   |
| LTR/ERVK | RLTR44A      | 1 |   |   |   |   | 1 |  | 1 |
| LTR/ERVK | RLTR44B-int  | 1 | 1 |   |   |   |   |  |   |
| LTR/ERVK | RLTR44D      | 1 |   |   | 1 |   |   |  |   |
| LTR/ERVK | RLTR9A2      | 1 |   |   |   |   | 1 |  |   |
| LTR/ERVK | RLTR9B       | 1 |   |   |   |   | 1 |  |   |
| LTR/ERVK | RLTR9F       | 1 | 1 |   |   |   |   |  |   |
| LTR/ERVK | RMER12B      | 1 |   |   |   |   |   |  |   |
| LTR/ERVK | RMER17B-int  | 1 |   |   |   |   |   |  |   |
| LTR/ERVK | RMER6B       | 1 |   |   |   |   |   |  |   |
| LTR/ERVK | SRV_MM-int   | 1 |   |   |   |   |   |  |   |

|                       |             |              |             |             |             |             |             |           |           |            |            |
|-----------------------|-------------|--------------|-------------|-------------|-------------|-------------|-------------|-----------|-----------|------------|------------|
| LTR/ERVK              | RMER17C-int |              |             |             |             | 2           |             | 1         |           |            |            |
| LTR/ERVK              | IAPEYLTR    |              |             |             |             | 1           |             | 1         |           |            |            |
| LTR/ERVK              | RLTR20C     |              |             |             |             | 1           |             |           |           |            |            |
| LTR/ERVK              | RLTR13C1    |              |             |             |             | 1           |             | 1         |           |            |            |
| <b>LTR/ERVK total</b> |             | <b>21087</b> | <b>4466</b> | <b>3272</b> | <b>4759</b> | <b>2052</b> | <b>1158</b> | <b>75</b> | <b>59</b> | <b>366</b> | <b>226</b> |
| LTR/ERVL              | MT2_Mm      | 535          | 116         | 85          | 99          | 62          | 32          | 2         |           | 13         | 3          |
| LTR/ERVL              | MERVL-_Mm   | 347          | 54          | 61          | 87          | 42          | 12          | 2         |           | 2          |            |
| LTR/ERVL              | MT2C_Mm     | 258          | 12          | 67          | 8           | 103         | 7           |           | 2         | 1          | 1          |
| LTR/ERVL              | RMER15-int  | 15           |             |             |             | 8           | 1           |           |           |            |            |
| LTR/ERVL              | MT2A        | 12           | 2           |             | 1           | 2           | 1           |           |           |            | 1          |
| LTR/ERVL              | RMER15      | 9            | 2           | 1           |             | 2           |             |           |           |            |            |
| LTR/ERVL              | MERVL       | 8            | 2           | 1           | 1           | 2           |             |           |           |            |            |
| LTR/ERVL              | MERVL-C_Mm  | 6            |             | 1           | 1           |             |             |           |           |            |            |
| LTR/ERVL              | MT2B2       | 6            | 2           | 1           | 1           | 1           |             |           |           |            |            |
| LTR/ERVL              | MERVL-A     | 5            | 2           | 1           |             |             |             |           |           |            |            |
| LTR/ERVL              | MT2B        | 4            | 1           | 2           |             |             |             |           |           |            |            |
| LTR/ERVL              | MERVL-B     | 3            |             |             | 3           |             |             |           |           |            |            |
| LTR/ERVL              | MERVL_2A    | 3            |             | 1           |             |             | 1           |           |           |            |            |
| LTR/ERVL              | RLTR28      | 3            |             |             |             |             |             |           |           |            |            |
| LTR/ERVL              | RMER10B     | 3            | 3           |             |             |             |             |           |           |            |            |
| LTR/ERVL              | MER54A      | 2            |             |             |             |             |             |           |           |            |            |
| LTR/ERVL              | MER70B      | 2            |             |             |             |             |             |           |           |            |            |
| LTR/ERVL              | MER74A      | 2            |             |             |             | 1           |             |           |           |            |            |
| LTR/ERVL              | MLT2B4      | 2            |             | 1           | 1           |             |             |           |           |            |            |
| LTR/ERVL              | ERVL        | 1            |             |             |             |             |             |           |           |            |            |
| LTR/ERVL              | ERVL-B4     | 1            |             |             |             |             |             |           |           |            |            |
| LTR/ERVL              | HERV16      | 1            |             |             | 1           |             |             |           |           |            |            |
| LTR/ERVL              | HERV40      | 1            |             |             |             |             |             |           |           |            |            |
| LTR/ERVL              | LTR16A1     | 1            |             |             |             |             |             |           |           |            |            |
| LTR/ERVL              | LTR16C      | 1            |             |             |             |             |             |           |           |            |            |
| LTR/ERVL              | LTR16D      | 1            |             |             |             | 1           |             |           |           |            |            |
| LTR/ERVL              | LTR40a      | 1            |             |             |             | 1           |             |           |           |            |            |
| LTR/ERVL              | MER68       | 1            |             |             |             |             |             |           |           |            |            |
| LTR/ERVL              | MERVL-B4    | 1            |             |             |             | 1           |             |           |           |            |            |
| LTR/ERVL              | RMER10A     | 1            |             |             |             |             |             |           |           |            |            |
| <b>LTR/ERVL total</b> |             | <b>1236</b>  | <b>196</b>  | <b>222</b>  | <b>203</b>  | <b>226</b>  | <b>54</b>   | <b>4</b>  | <b>2</b>  | <b>16</b>  | <b>5</b>   |
| LTR/MaLR              | MTA_Mm-int  | 7813         | 3021        | 1409        | 1213        | 124         | 87          | 10        | 12        | 21         | 7          |
| LTR/MaLR              | MTC         | 7620         | 142         | 6949        | 13          | 8           | 2           |           |           |            |            |
| LTR/MaLR              | MTA_Mm      | 7418         | 2252        | 1748        | 949         | 377         | 58          | 1         | 2         | 27         |            |
| LTR/MaLR              | MTB_Mm      | 400          | 263         | 22          | 4           | 6           | 2           |           |           |            | 1          |
| LTR/MaLR              | MTB         | 344          | 46          | 107         | 17          | 52          | 5           | 1         |           | 1          | 2          |
| LTR/MaLR              | MTC-int     | 164          | 21          | 5           | 78          |             | 2           |           |           | 2          |            |
| LTR/MaLR              | MTD         | 118          | 9           | 41          | 7           | 7           | 5           |           | 2         | 2          |            |
| LTR/MaLR              | MTB-int     | 65           | 18          | 21          | 3           | 1           |             |           |           |            |            |
| LTR/MaLR              | ORR1E       | 64           |             | 1           | 2           | 1           | 1           |           |           |            |            |
| LTR/MaLR              | ORR1A2-int  | 54           | 15          | 10          | 8           |             | 1           |           |           | 1          |            |
| LTR/MaLR              | ORR1A2      | 48           | 13          | 6           | 6           | 4           | 2           |           |           | 1          |            |
| LTR/MaLR              | ORR1A0-int  | 33           | 4           | 2           | 11          | 2           | 5           |           |           | 2          |            |
| LTR/MaLR              | ORR1A1-int  | 25           | 5           | 7           | 3           |             | 3           |           |           |            |            |
| LTR/MaLR              | ORR1A3-int  | 22           |             | 6           |             | 9           | 3           |           |           |            | 2          |
| LTR/MaLR              | ORR1D1      | 20           |             | 2           | 1           | 10          | 1           |           |           |            |            |
| LTR/MaLR              | MTB_Mm-int  | 16           | 9           | 4           | 2           |             |             |           |           |            |            |
| LTR/MaLR              | ORR1A0      | 13           | 7           |             |             | 1           |             |           |           |            |            |
| LTR/MaLR              | MLT1G3      | 12           |             |             |             |             |             |           |           |            |            |
| LTR/MaLR              | ORR1A4-int  | 12           | 5           | 1           | 3           |             | 1           |           | 1         |            |            |
| LTR/MaLR              | ORR1A4      | 11           | 1           | 1           |             | 6           | 3           |           |           |            | 3          |
| LTR/MaLR              | ORR1B1      | 10           |             |             | 2           | 1           | 2           |           |           | 1          | 1          |
| LTR/MaLR              | MTE2a       | 9            |             |             | 2           | 3           |             |           |           |            |            |
| LTR/MaLR              | MT-int      | 8            | 2           | 1           | 1           |             |             |           |           |            |            |
| LTR/MaLR              | MTEb        | 8            |             | 1           | 1           | 2           | 1           |           |           |            | 1          |
| LTR/MaLR              | ORR1D2      | 8            |             |             |             | 3           |             |           |           |            |            |
| LTR/MaLR              | MTE2b       | 7            |             |             | 1           | 3           |             |           |           |            |            |
| LTR/MaLR              | MTEa        | 7            | 1           | 1           | 1           | 2           | 2           |           |           |            | 1          |
| LTR/MaLR              | ORR1B1-int  | 7            | 2           |             | 1           |             |             |           |           |            |            |
| LTR/MaLR              | MTD-int     | 6            | 2           |             | 3           |             | 1           |           |           | 1          |            |
| LTR/MaLR              | MLT1D       | 5            |             |             | 2           |             |             |           |           |            |            |
| LTR/MaLR              | ORR1B2      | 5            | 1           |             |             |             |             |           |           |            |            |
| LTR/MaLR              | ORR1D1-int  | 5            | 1           |             | 1           |             |             |           |           |            |            |
| LTR/MaLR              | MLT1C       | 4            | 1           |             |             |             | 1           |           |           |            | 1          |
| LTR/MaLR              | ORR1C1      | 4            | 2           |             | 2           |             |             |           |           |            |            |
| LTR/MaLR              | ORR1C2      | 4            |             |             | 1           |             | 1           |           |           |            |            |

|                        |            |              |             |              |             |            |            |           |           |           |           |
|------------------------|------------|--------------|-------------|--------------|-------------|------------|------------|-----------|-----------|-----------|-----------|
| LTR/MaLR               | MLT1F      | 3            |             |              | 1           |            |            |           |           |           |           |
| LTR/MaLR               | MTEa-int   | 3            |             |              |             |            |            |           |           |           |           |
| LTR/MaLR               | ORR1A1     | 3            | 1           |              |             |            | 2          |           |           | 1         |           |
| LTR/MaLR               | ORR1A3     | 3            |             | 1            |             | 1          |            |           |           |           |           |
| LTR/MaLR               | ORR1C1-int | 3            |             |              | 1           |            |            |           |           |           |           |
| LTR/MaLR               | MLT1A      | 2            |             | 1            | 1           |            |            | 1         |           |           |           |
| LTR/MaLR               | MLT1A0     | 2            |             |              |             | 1          |            | 2         |           | 1         | 1         |
| LTR/MaLR               | MLT1A1     | 2            | 1           |              |             |            |            |           |           |           |           |
| LTR/MaLR               | MLT1E-int  | 2            |             |              |             |            |            |           |           |           |           |
| LTR/MaLR               | MLT1E1     | 2            | 1           |              |             |            |            | 1         |           | 1         |           |
| LTR/MaLR               | MLT1E3     | 2            |             |              |             |            |            |           |           |           |           |
| LTR/MaLR               | MLT1I      | 2            |             |              | 2           |            |            |           |           |           |           |
| LTR/MaLR               | ORR1C2-int | 2            |             |              |             |            |            |           |           |           |           |
| LTR/MaLR               | ORR1E-int  | 2            | 1           |              | 1           |            |            |           |           |           |           |
| LTR/MaLR               | MLT1B      | 1            |             |              | 1           |            |            |           |           |           |           |
| LTR/MaLR               | MLT1E      | 1            |             |              |             | 1          |            | 1         |           | 1         |           |
| LTR/MaLR               | MLT1E2     | 1            |             |              |             |            |            |           |           |           |           |
| LTR/MaLR               | MLT1F1     | 1            |             |              |             |            |            |           |           |           |           |
| LTR/MaLR               | MLT1H      | 1            |             |              | 1           |            |            |           |           |           |           |
| LTR/MaLR               | MTE2a-int  | 1            |             |              |             | 1          |            |           |           |           |           |
| <b>LTR/MaLR total</b>  |            | <b>24408</b> | <b>5847</b> | <b>10347</b> | <b>2346</b> | <b>626</b> | <b>196</b> | <b>12</b> | <b>17</b> | <b>63</b> | <b>20</b> |
| Other                  | RMER1B     | 15           |             |              | 1           | 2          |            |           |           |           |           |
| Other                  | RMER1A     | 4            |             |              | 1           | 1          |            |           |           |           |           |
| Other                  | RMER1C     | 4            |             | 1            |             | 1          | 1          |           |           |           |           |
| <b>Other total</b>     |            | <b>23</b>    | <b>0</b>    | <b>1</b>     | <b>2</b>    | <b>4</b>   | <b>1</b>   | <b>0</b>  | <b>0</b>  | <b>0</b>  | <b>0</b>  |
| Satellite              | MMSAT4     | 10           | 2           |              | 4           |            | 3          |           |           | 2         |           |
| Satellite              | ZP3AR      | 2            |             | 1            |             |            |            |           |           |           |           |
| <b>Satellite total</b> |            | <b>12</b>    | <b>2</b>    | <b>1</b>     | <b>4</b>    | <b>0</b>   | <b>3</b>   | <b>0</b>  | <b>0</b>  | <b>2</b>  | <b>0</b>  |
| Simple_repeat          | (CCA)n     | 18           | 3           |              | 1           |            |            |           |           |           |           |
| Simple_repeat          | (TG)n      | 13           | 3           | 1            |             | 6          |            |           |           |           |           |
| Simple_repeat          | (CA)n      | 8            | 4           |              | 2           | 1          | 1          |           |           | 1         |           |
| Simple_repeat          | (CGG)n     | 8            | 3           | 3            | 1           |            |            |           |           |           |           |
| Simple_repeat          | (CAG)n     | 7            | 2           |              |             | 2          | 1          |           |           |           | 1         |
| Simple_repeat          | (CTG)n     | 6            | 3           | 1            | 1           | 1          |            |           |           |           |           |
| Simple_repeat          | (CAA)n     | 5            |             |              |             | 3          |            |           |           |           |           |
| Simple_repeat          | (GA)n      | 4            |             |              |             |            |            |           |           |           |           |
| Simple_repeat          | (TGG)n     | 4            |             |              |             |            |            |           |           |           |           |
| Simple_repeat          | (ATG)n     | 3            | 1           |              | 1           |            |            |           |           |           |           |
| Simple_repeat          | (CACCT)n   | 3            |             |              | 2           |            |            |           |           |           |           |
| Simple_repeat          | (CAT)n     | 3            | 1           |              |             |            |            |           |           |           |           |
| Simple_repeat          | (CCG)n     | 3            | 1           |              | 1           |            |            |           |           |           |           |
| Simple_repeat          | (TCC)n     | 3            |             | 1            |             |            |            |           |           |           |           |
| Simple_repeat          | (TTT)n     | 3            |             |              |             |            |            |           |           |           |           |
| Simple_repeat          | (CATATA)n  | 2            |             |              |             |            |            |           |           |           |           |
| Simple_repeat          | (CCCCAG)n  | 2            |             |              | 1           |            |            |           |           |           |           |
| Simple_repeat          | (TA)n      | 2            |             | 1            |             | 1          |            |           |           |           |           |
| Simple_repeat          | (TC)n      | 2            |             |              |             | 1          |            |           |           |           |           |
| Simple_repeat          | (TTTC)n    | 2            |             |              |             |            |            |           |           |           |           |
| Simple_repeat          | (ACTG)n    | 1            |             |              |             |            |            |           |           |           |           |
| Simple_repeat          | (ATGGTG)n  | 1            |             |              |             |            |            |           |           |           |           |
| Simple_repeat          | (ATTG)n    | 1            |             |              |             | 1          |            |           |           |           |           |
| Simple_repeat          | (CAAAA)n   | 1            |             |              |             |            |            |           |           |           |           |
| Simple_repeat          | (CACAG)n   | 1            |             |              |             | 1          |            |           |           |           |           |
| Simple_repeat          | (CACG)n    | 1            |             |              |             |            |            |           |           |           |           |
| Simple_repeat          | (CAGA)n    | 1            |             |              |             |            |            |           |           |           |           |
| Simple_repeat          | (CAGAG)n   | 1            |             |              | 1           |            |            |           |           |           |           |
| Simple_repeat          | (CAGAGA)n  | 1            |             |              |             |            |            |           |           |           |           |
| Simple_repeat          | (CAGG)n    | 1            |             |              |             | 1          |            |           |           |           |           |
| Simple_repeat          | (CATA)n    | 1            |             |              |             |            |            |           |           |           |           |
| Simple_repeat          | (CCCCA)n   | 1            | 1           |              |             |            |            |           |           |           |           |
| Simple_repeat          | (CCCG)n    | 1            |             |              |             |            |            |           |           |           |           |
| Simple_repeat          | (CCCGG)n   | 1            |             | 1            |             |            |            |           |           |           |           |
| Simple_repeat          | (CCGCG)n   | 1            |             |              |             |            |            |           |           |           |           |
| Simple_repeat          | (CCTG)n    | 1            |             |              | 1           |            |            |           |           |           |           |
| Simple_repeat          | (CGGAG)n   | 1            | 1           |              |             |            |            |           |           |           |           |
| Simple_repeat          | (CGGG)n    | 1            | 1           |              |             |            |            |           |           |           |           |
| Simple_repeat          | (CGGGG)n   | 1            |             |              |             |            |            |           |           |           |           |
| Simple_repeat          | (CTA)n     | 1            |             |              |             |            |            |           |           |           |           |
| Simple_repeat          | (CTGTG)n   | 1            |             |              |             |            |            |           |           |           |           |
| Simple_repeat          | (G)n       | 1            |             |              |             |            |            |           |           |           |           |
| Simple_repeat          | (GGA)n     | 1            | 1           |              |             |            |            |           |           |           |           |

|                            |            |              |              |              |              |             |             |            |            |            |            |
|----------------------------|------------|--------------|--------------|--------------|--------------|-------------|-------------|------------|------------|------------|------------|
| Simple_repeat              | (GGAA)n    | 1            |              |              |              |             |             |            |            |            |            |
| Simple_repeat              | (TCG)n     | 1            |              |              |              |             |             |            |            |            |            |
| Simple_repeat              | (TCTCTG)n  | 1            |              |              |              |             |             |            |            |            |            |
| Simple_repeat              | (TCTG)n    | 1            | 1            |              |              |             |             |            |            |            |            |
| Simple_repeat              | (TGAG)n    | 1            |              |              |              | 1           |             |            |            |            |            |
| Simple_repeat              | (A)n       |              |              |              |              |             |             |            | 1          |            |            |
| Simple_repeat              | (CAA)n     |              |              |              |              |             |             |            | 1          |            |            |
| Simple_repeat              | (TTG)n     |              |              |              |              |             |             |            | 1          |            |            |
| <b>Simple_repeat total</b> |            | <b>129</b>   | <b>25</b>    | <b>9</b>     | <b>12</b>    | <b>19</b>   | <b>5</b>    | <b>0</b>   | <b>1</b>   | <b>1</b>   | <b>1</b>   |
| SINE/Alu                   | B1_Mus1    | 445          | 123          | 79           | 48           | 43          | 26          | 2          | 6          | 3          | 3          |
| SINE/Alu                   | B1_Mus2    | 192          | 28           | 23           | 37           | 16          | 10          | 1          | 2          | 1          | 1          |
| SINE/Alu                   | B1_Mm      | 139          | 30           | 32           | 24           | 6           | 13          | 1          | 1          | 4          |            |
| SINE/Alu                   | B1_Mur3    | 53           | 7            | 4            | 15           | 5           | 2           |            |            | 1          | 1          |
| SINE/Alu                   | B1_Mur4    | 36           | 6            | 9            | 4            | 5           | 3           |            | 1          |            | 1          |
| SINE/Alu                   | PB1D10     | 33           | 1            | 2            | 10           | 5           | 2           |            |            |            |            |
| SINE/Alu                   | B1_Mur2    | 22           |              | 4            | 3            | 5           | 8           |            | 1          |            | 3          |
| SINE/Alu                   | B1F        | 22           | 3            |              | 2            | 6           | 4           |            |            |            | 3          |
| SINE/Alu                   | B1_Mur1    | 19           |              | 2            | 5            | 1           | 10          |            |            | 2          | 1          |
| SINE/Alu                   | PB1D7      | 17           | 2            | 3            | 1            | 6           | 3           |            |            |            | 1          |
| SINE/Alu                   | B1F2       | 13           | 1            | 1            | 5            | 1           | 4           |            |            |            |            |
| SINE/Alu                   | PB1        | 11           | 3            |              | 2            |             | 2           |            |            |            | 1          |
| SINE/Alu                   | B1F1       | 9            |              | 2            | 1            | 3           | 1           |            |            |            |            |
| SINE/Alu                   | PB1D9      | 8            |              | 1            | 1            | 2           |             |            |            |            |            |
| <b>SINE/Alu total</b>      |            | <b>1019</b>  | <b>204</b>   | <b>162</b>   | <b>158</b>   | <b>104</b>  | <b>88</b>   | <b>4</b>   | <b>11</b>  | <b>11</b>  | <b>15</b>  |
| SINE/B2                    | B3         | 220          | 136          | 2            | 15           | 13          | 17          |            |            | 6          | 4          |
| SINE/B2                    | B2_Mm2     | 79           | 25           | 19           | 7            | 3           | 13          | 1          |            | 3          | 1          |
| SINE/B2                    | B3A        | 49           | 7            | 2            | 6            | 7           | 4           |            |            |            |            |
| SINE/B2                    | B2_Mm1a    | 20           | 4            | 3            | 4            | 1           | 6           | 1          | 1          |            | 2          |
| SINE/B2                    | B2_Mm1t    | 19           | 7            | 6            |              | 1           | 5           |            |            |            | 3          |
| <b>SINE/B2 total</b>       |            | <b>387</b>   | <b>179</b>   | <b>32</b>    | <b>32</b>    | <b>25</b>   | <b>45</b>   | <b>2</b>   | <b>1</b>   | <b>9</b>   | <b>10</b>  |
| SINE/B4                    | B4A        | 71           | 5            | 28           | 5            | 4           | 21          | 1          |            |            | 5          |
| SINE/B4                    | ID_B1      | 69           | 6            | 10           | 8            | 15          | 9           |            |            |            | 4          |
| SINE/B4                    | RSINE1     | 37           | 5            | 3            | 2            | 7           | 5           | 1          | 1          |            |            |
| SINE/B4                    | B4         | 26           | 1            | 2            | 5            | 9           | 7           |            |            | 1          | 4          |
| <b>SINE/B4 total</b>       |            | <b>203</b>   | <b>17</b>    | <b>43</b>    | <b>20</b>    | <b>35</b>   | <b>42</b>   | <b>2</b>   | <b>1</b>   | <b>1</b>   | <b>13</b>  |
| SINE/ID                    | ID4_       | 11           | 1            |              | 2            | 5           |             |            |            |            |            |
| SINE/ID                    | ID4        | 7            |              | 2            |              | 2           | 1           |            |            |            |            |
| SINE/ID                    | ID         | 4            |              |              | 1            |             |             |            |            |            |            |
| SINE/ID                    | ID2        |              |              |              |              |             | 1           |            |            |            | 1          |
| <b>SINE/ID total</b>       |            | <b>22</b>    | <b>1</b>     | <b>2</b>     | <b>3</b>     | <b>7</b>    | <b>2</b>    | <b>0</b>   | <b>0</b>   | <b>0</b>   | <b>1</b>   |
| SINE/MIR                   | MIRb       | 16           | 1            | 1            | 4            | 2           | 5           |            |            |            | 2          |
| SINE/MIR                   | MIR        | 15           | 2            | 1            | 5            |             | 1           |            |            |            | 1          |
| SINE/MIR                   | MIR3       | 5            |              | 1            |              |             |             |            |            |            |            |
| SINE/MIR                   | MIRm       | 4            |              |              |              | 1           |             |            |            |            |            |
| SINE/MIR                   | MIR_Mars   | 3            |              | 1            |              |             |             |            |            |            |            |
| SINE/MIR                   | THER1_MD   | 1            |              |              |              |             |             |            |            |            |            |
| <b>SINE/MIR total</b>      |            | <b>44</b>    | <b>3</b>     | <b>4</b>     | <b>9</b>     | <b>3</b>    | <b>6</b>    | <b>0</b>   | <b>0</b>   | <b>0</b>   | <b>3</b>   |
| Unknown                    | MurSatRep1 | 9            | 1            |              | 4            |             |             |            |            |            |            |
| <b>Unknown total</b>       |            | <b>9</b>     | <b>1</b>     | <b>0</b>     | <b>4</b>     | <b>0</b>    | <b>0</b>    | <b>0</b>   | <b>0</b>   | <b>0</b>   | <b>0</b>   |
| <b>Total</b>               |            | <b>72828</b> | <b>15382</b> | <b>19280</b> | <b>10048</b> | <b>7452</b> | <b>2331</b> | <b>135</b> | <b>143</b> | <b>568</b> | <b>519</b> |

Supplementary Table 2. Annotation of repeat small RNAs

| class                      | subclass    | Number of clones (growing oocytes) |            |            |            | Number of clones (Mili IP) |          |            |            |            |            |
|----------------------------|-------------|------------------------------------|------------|------------|------------|----------------------------|----------|------------|------------|------------|------------|
|                            |             | Total                              | 20-22 nt + | 20-22 nt - | 25-27 nt + | 25-27 nt -                 | Total    | 20-22 nt + | 20-22 nt - | 25-27 nt + | 25-27 nt - |
| DNA/MER1_type              | MER5A       | 6                                  |            |            |            | 1                          | 1        |            |            |            |            |
| DNA/MER1_type              | URR1A       | 6                                  |            |            |            | 3                          | 1        |            |            |            |            |
| DNA/MER1_type              | RCHARR1     | 4                                  |            |            |            | 3                          | 1        |            |            |            |            |
| DNA/MER1_type              | URR1B       | 4                                  |            |            | 1          | 2                          | 1        |            |            |            |            |
| DNA/MER1_type              | Charlie5    | 3                                  | 1          |            |            |                            |          |            |            |            |            |
| DNA/MER1_type              | RMER30      | 2                                  | 1          |            | 1          |                            |          |            |            |            |            |
| DNA/MER1_type              | Charlie8    | 1                                  |            |            |            |                            |          |            |            |            |            |
| DNA/MER1_type              | MER112      | 1                                  |            |            |            |                            |          |            |            |            |            |
| DNA/MER1_type              | MER20       | 1                                  | 1          |            |            |                            |          |            |            |            |            |
| DNA/MER1_type              | MER58B      | 1                                  |            |            | 1          |                            |          |            |            |            |            |
| DNA/MER1_type              | MER5A1      | 1                                  | 1          |            |            |                            |          |            |            |            |            |
| DNA/MER1_type              | MER5B       | 1                                  |            |            |            |                            | 1        |            |            |            | 1          |
| DNA/MER1_type              | Charlie1    |                                    |            |            |            |                            | 1        |            |            |            | 1          |
| DNA/MER1_type              | MER2        |                                    |            |            |            |                            | 1        |            |            | 1          |            |
| <b>DNA/MER1_type total</b> |             | <b>31</b>                          | <b>4</b>   | <b>0</b>   | <b>3</b>   | <b>9</b>                   | <b>7</b> | <b>0</b>   | <b>0</b>   | <b>1</b>   | <b>2</b>   |
| DNA/MER2_type              | MER44A      | 2                                  |            |            |            |                            |          |            |            |            |            |
| DNA/MER2_type              | MER82       | 2                                  |            |            |            |                            |          |            |            |            |            |
| DNA/MER2_type              | Tigger7     | 2                                  |            |            |            |                            |          |            |            |            |            |
| DNA/MER2_type              | MER2        | 1                                  |            |            | 1          |                            |          |            |            |            |            |
| DNA/MER2_type              | Tigger5     | 1                                  |            |            | 1          |                            |          |            |            |            |            |
| <b>DNA/MER2_type total</b> |             | <b>8</b>                           | <b>0</b>   | <b>0</b>   | <b>2</b>   | <b>0</b>                   | <b>0</b> | <b>0</b>   | <b>0</b>   | <b>0</b>   | <b>0</b>   |
| DNA/Tip100                 | Arthur1     | 1                                  |            |            |            |                            |          |            |            |            |            |
| DNA/Tip100                 | MER115      | 1                                  |            |            |            |                            |          |            |            |            |            |
| DNA/Tip100                 | FordPrefect |                                    |            |            |            |                            | 1        |            |            |            |            |
| <b>DNA/Tip100 total</b>    |             | <b>2</b>                           | <b>0</b>   | <b>0</b>   | <b>0</b>   | <b>0</b>                   | <b>1</b> | <b>0</b>   | <b>0</b>   | <b>0</b>   | <b>0</b>   |
| LINE/CR1                   | L3          | 4                                  |            |            | 1          |                            |          |            |            |            |            |
| LINE/CR1                   | L3_Mars     | 3                                  |            |            | 2          |                            |          |            |            |            |            |
| LINE/CR1                   | L3b         | 1                                  |            |            |            |                            |          |            |            |            |            |
| <b>LINE/CR1 total</b>      |             | <b>8</b>                           | <b>0</b>   | <b>0</b>   | <b>3</b>   | <b>0</b>                   | <b>0</b> | <b>0</b>   | <b>0</b>   | <b>0</b>   | <b>0</b>   |
| LINE/L1                    | L1Md_F2     | 7100                               | 1123       | 1445       | 718        | 1431                       | 161      | 10         | 22         | 19         | 44         |
| LINE/L1                    | L1Md_A      | 2640                               | 539        | 487        | 427        | 352                        | 111      | 10         | 2          | 23         | 33         |
| LINE/L1                    | L1Md_T      | 2408                               | 381        | 618        | 393        | 315                        | 79       | 6          | 8          | 15         | 21         |
| LINE/L1                    | L1Md_Gf     | 949                                | 254        | 261        | 123        | 37                         | 38       | 1          | 3          | 9          | 3          |
| LINE/L1                    | L1_Mus1     | 783                                | 110        | 73         | 136        | 206                        | 33       |            |            | 3          | 10         |
| LINE/L1                    | L1Md_F      | 751                                | 82         | 147        | 78         | 207                        | 31       | 1          | 2          | 2          | 13         |
| LINE/L1                    | L1_Mus2     | 496                                | 31         | 53         | 62         | 194                        | 30       |            |            | 1          | 17         |
| LINE/L1                    | L1Md_F3     | 393                                | 35         | 61         | 43         | 110                        | 9        | 1          |            | 3          | 2          |
| LINE/L1                    | L1_Mus3     | 353                                | 37         | 48         | 54         | 83                         | 10       |            | 2          | 3          | 1          |
| LINE/L1                    | Lx          | 183                                | 14         | 16         | 31         | 64                         | 5        |            |            |            | 2          |
| LINE/L1                    | L1_Mm       | 125                                | 8          | 20         | 13         | 51                         | 5        |            |            |            | 4          |
| LINE/L1                    | Lx8         | 79                                 | 2          | 5          | 4          | 8                          | 11       |            |            | 2          | 2          |
| LINE/L1                    | L1_Mur1     | 41                                 | 1          |            | 1          | 25                         | 1        | 1          |            |            |            |
| LINE/L1                    | MusHAL1     | 38                                 | 2          | 4          | 3          | 8                          | 5        |            |            | 1          | 2          |
| LINE/L1                    | Lx5         | 36                                 | 3          | 3          | 12         | 3                          | 5        | 1          |            | 1          |            |
| LINE/L1                    | L1_Mus4     | 35                                 | 4          | 5          | 10         | 6                          | 2        |            |            | 1          |            |
| LINE/L1                    | L1VL1       | 32                                 | 10         | 2          | 9          | 6                          | 1        |            |            | 1          |            |
| LINE/L1                    | L1VL2       | 32                                 | 10         |            | 7          | 4                          | 5        |            |            | 1          | 2          |
| LINE/L1                    | L1_Mur3     | 30                                 | 1          | 2          |            | 6                          | 3        |            |            |            | 1          |
| LINE/L1                    | L1VL4       | 29                                 | 6          | 2          | 3          | 5                          | 2        |            |            | 1          |            |
| LINE/L1                    | L1_Mur2     | 28                                 | 1          |            | 9          | 5                          | 1        |            |            |            |            |
| LINE/L1                    | Lx3_Mus     | 22                                 | 7          | 1          | 3          | 5                          | 3        |            | 2          |            |            |
| LINE/L1                    | Lx2         | 21                                 | 1          | 2          | 4          | 3                          | 2        |            |            | 1          |            |
| LINE/L1                    | Lx9         | 20                                 | 2          | 1          | 2          | 4                          |          |            |            |            |            |
| LINE/L1                    | L1_Rod      | 18                                 |            |            |            |                            | 1        |            |            |            | 1          |
| LINE/L1                    | Lx2B        | 17                                 | 1          | 2          | 2          | 1                          |          |            |            |            |            |
| LINE/L1                    | Lx4B        | 14                                 |            |            |            |                            |          |            |            |            |            |
| LINE/L1                    | Lx7         | 14                                 | 2          | 1          | 2          | 1                          | 1        |            |            |            |            |
| LINE/L1                    | Lx4A        | 11                                 |            |            | 2          |                            |          |            |            |            |            |
| LINE/L1                    | L1M5        | 10                                 |            | 3          |            |                            |          |            |            |            |            |
| LINE/L1                    | Lx6         | 10                                 | 1          | 1          | 2          | 2                          |          |            |            |            |            |
| LINE/L1                    | L1M2        | 9                                  |            | 1          | 1          | 3                          |          |            |            |            |            |
| LINE/L1                    | Lx2A1       | 8                                  |            |            |            | 2                          |          |            |            |            |            |
| LINE/L1                    | Lx3B        | 8                                  | 1          | 1          | 1          |                            |          |            |            |            |            |
| LINE/L1                    | Lx3A        | 7                                  | 1          |            | 2          |                            |          |            |            |            |            |
| LINE/L1                    | Lx3C        | 7                                  |            | 1          |            | 1                          | 1        |            |            |            |            |
| LINE/L1                    | L1MA8       | 4                                  |            |            | 1          | 2                          |          |            |            |            |            |
| LINE/L1                    | L1MCA       | 4                                  |            |            |            | 2                          |          |            |            |            |            |
| LINE/L1                    | L1MA6       | 3                                  |            |            | 1          | 1                          | 1        |            |            |            |            |

|                             |               |              |             |             |             |             |            |           |           |           |            |
|-----------------------------|---------------|--------------|-------------|-------------|-------------|-------------|------------|-----------|-----------|-----------|------------|
| LINE/L1                     | L1MCb         | 3            |             |             |             |             |            |           |           |           |            |
| LINE/L1                     | L1MD          | 3            |             |             |             | 1           |            | 1         |           | 1         |            |
| LINE/L1                     | L1M3          | 2            |             |             |             |             |            | 1         |           |           |            |
| LINE/L1                     | L1M4          | 2            |             |             | 1           |             |            |           |           |           |            |
| LINE/L1                     | L1MA4         | 2            |             |             |             |             |            |           |           |           |            |
| LINE/L1                     | L1MB4         | 2            |             |             | 1           |             |            |           |           |           |            |
| LINE/L1                     | L1MDa         | 2            |             |             |             |             |            |           |           |           |            |
| LINE/L1                     | L1ME1         | 2            |             |             | 2           |             |            |           |           |           |            |
| LINE/L1                     | L1MEe         | 2            | 1           |             |             |             |            |           |           |           |            |
| LINE/L1                     | L1M           | 1            |             |             |             | 1           |            |           |           |           |            |
| LINE/L1                     | L1M4c         | 1            |             |             |             |             |            |           |           |           |            |
| LINE/L1                     | L1MA5         | 1            |             |             |             | 1           |            |           |           |           |            |
| LINE/L1                     | L1MA5A        | 1            |             |             |             |             |            |           |           |           |            |
| LINE/L1                     | L1MA7         | 1            |             |             |             |             |            |           |           |           |            |
| LINE/L1                     | L1MB5         | 1            |             |             |             |             |            |           |           |           |            |
| LINE/L1                     | L1MB7         | 1            |             |             |             |             |            |           |           |           |            |
| LINE/L1                     | L1MC          | 1            |             |             |             |             |            |           |           |           |            |
| LINE/L1                     | L1MC4         | 1            |             |             | 1           |             |            |           |           |           |            |
| LINE/L1                     | L1MD2         | 1            |             |             |             |             |            |           |           |           |            |
| LINE/L1                     | L1ME3         | 1            |             |             |             |             |            |           |           |           |            |
| LINE/L1                     | L1ME3B        | 1            |             |             |             |             |            |           |           |           |            |
| LINE/L1                     | Lx2A          | 1            | 1           |             |             |             |            |           |           |           |            |
| LINE/L1                     | L1MB3         |              |             |             |             |             |            | 2         |           |           |            |
| <b>LINE/L1 total</b>        |               | <b>16801</b> | <b>2672</b> | <b>3266</b> | <b>2164</b> | <b>3156</b> | <b>561</b> | <b>32</b> | <b>41</b> | <b>87</b> | <b>158</b> |
| LINE/L2                     | L2            | 39           | 16          | 1           | 6           | 4           | 2          | 1         | 1         |           |            |
| <b>LINE/L2 total</b>        |               | <b>39</b>    | <b>16</b>   | <b>1</b>    | <b>6</b>    | <b>4</b>    | <b>2</b>   | <b>1</b>  | <b>1</b>  | <b>0</b>  | <b>0</b>   |
| LINE/RTE                    | L4            |              |             |             |             |             | 1          |           |           |           | 1          |
| <b>LINE/RTE total</b>       |               | <b>0</b>     | <b>0</b>    | <b>0</b>    | <b>0</b>    | <b>0</b>    | <b>1</b>   | <b>0</b>  | <b>0</b>  | <b>0</b>  | <b>1</b>   |
| Low_complexity              | CT-rich       | 15           | 1           |             |             | 2           |            |           |           |           |            |
| Low_complexity              | G-rich        | 12           | 3           | 4           |             |             |            |           |           |           |            |
| Low_complexity              | GA-rich       | 10           |             | 1           |             |             | 1          |           |           | 1         |            |
| Low_complexity              | GC-rich       | 9            | 1           | 5           |             | 1           |            |           |           |           |            |
| Low_complexity              | C-rich        | 7            | 2           | 1           |             |             |            |           |           |           |            |
| Low_complexity              | AT-rich       | 3            |             |             |             | 1           |            |           |           |           |            |
| <b>Low_complexity total</b> |               | <b>56</b>    | <b>7</b>    | <b>11</b>   | <b>0</b>    | <b>4</b>    | <b>1</b>   | <b>0</b>  | <b>0</b>  | <b>1</b>  | <b>0</b>   |
| LTR/ERV1                    | LTRIS_Mm      | 2590         | 883         | 969         | 32          | 88          | 11         |           | 1         |           | 3          |
| LTR/ERV1                    | LTRIS_Mm-int  | 1806         | 358         | 390         | 152         | 367         | 47         |           | 2         |           | 22         |
| LTR/ERV1                    | LTRIS_Mus     | 1001         | 389         | 298         | 41          | 35          | 5          | 1         | 1         |           | 1          |
| LTR/ERV1                    | LTRIS_Mus-int | 623          | 63          | 121         | 25          | 273         | 5          | 1         |           |           | 3          |
| LTR/ERV1                    | RLTR6_Mm      | 271          |             | 2           |             |             |            |           |           |           |            |
| LTR/ERV1                    | RLTR6_Mm-int  | 217          | 1           | 15          | 4           | 104         | 13         | 1         | 2         |           | 4          |
| LTR/ERV1                    | RLTR5_Mm-int  | 173          | 1           | 11          |             | 100         | 10         |           |           |           | 5          |
| LTR/ERV1                    | MuRRS-int     | 88           | 16          | 14          | 4           | 24          |            |           |           |           |            |
| LTR/ERV1                    | MURVY-LTR     | 78           |             | 11          |             | 35          | 12         |           | 1         |           | 8          |
| LTR/ERV1                    | MuRRS4-int    | 69           | 12          | 11          | 9           | 17          | 2          |           |           |           |            |
| LTR/ERV1                    | MURVY-int     | 58           |             | 8           | 11          | 27          | 11         |           | 2         | 3         | 3          |
| LTR/ERV1                    | RLTR5_Mm      | 52           |             | 10          |             | 21          | 8          |           |           |           | 2          |
| LTR/ERV1                    | LTRIS2        | 43           |             | 23          |             | 14          | 1          |           |           |           | 1          |
| LTR/ERV1                    | RLTR4_Mm-int  | 38           | 7           | 1           | 17          | 1           | 3          |           |           | 3         |            |
| LTR/ERV1                    | RodERV21      | 37           |             | 5           |             | 15          | 3          |           |           | 1         |            |
| LTR/ERV1                    | RLTR1B        | 26           | 2           | 2           |             | 16          | 7          |           |           |           | 4          |
| LTR/ERV1                    | RLTR14-int    | 24           | 1           |             | 12          | 9           | 1          |           |           | 1         |            |
| LTR/ERV1                    | RLTR6-int     | 22           |             | 2           |             | 16          | 2          |           |           |           |            |
| LTR/ERV1                    | MMERGLN-int   | 16           |             | 4           |             | 5           | 5          |           |           |           | 4          |
| LTR/ERV1                    | RLTR1B-int    | 14           | 1           | 2           | 4           | 1           |            |           |           |           |            |
| LTR/ERV1                    | LTRIS2-int    | 7            |             |             |             |             |            |           |           |           |            |
| LTR/ERV1                    | RLTR4_Mm      | 7            | 5           | 1           |             |             |            |           |           |           |            |
| LTR/ERV1                    | RMER2         | 6            | 1           |             | 1           | 2           |            |           |           |           |            |
| LTR/ERV1                    | MMVL30-int    | 5            |             |             | 1           | 2           | 4          |           |           |           | 2          |
| LTR/ERV1                    | LTRIS4-int    | 4            |             | 3           |             | 1           |            |           |           |           |            |
| LTR/ERV1                    | MER52-int     | 4            |             | 1           |             | 2           |            |           |           |           |            |
| LTR/ERV1                    | MuLV-int      | 4            |             |             | 2           |             |            |           |           |           |            |
| LTR/ERV1                    | MER21B        | 3            |             |             |             |             | 2          |           |           |           | 2          |
| LTR/ERV1                    | RLTR23        | 3            |             | 1           |             | 1           |            |           |           |           |            |
| LTR/ERV1                    | LTR37B-int    | 2            | 2           |             |             |             |            |           |           |           |            |
| LTR/ERV1                    | LTRIS3        | 2            |             |             | 1           |             |            |           |           |           |            |
| LTR/ERV1                    | RLTR1         | 2            |             |             |             |             |            |           |           |           |            |
| LTR/ERV1                    | RMER5         | 2            |             |             | 1           |             | 1          |           |           |           |            |
| LTR/ERV1                    | LTRIS4        | 1            |             | 1           |             |             |            |           |           |           |            |
| LTR/ERV1                    | MER31-int     | 1            |             |             | 1           |             |            |           |           |           |            |
| LTR/ERV1                    | RLTR14        | 1            |             |             |             | 1           |            |           |           |           |            |

|                       |                 |             |             |             |            |             |            |          |          |           |           |  |
|-----------------------|-----------------|-------------|-------------|-------------|------------|-------------|------------|----------|----------|-----------|-----------|--|
| LTR/ERV1              | RLTR1C          | 1           |             |             |            | 1           |            |          |          |           |           |  |
| LTR/ERV1              | RLTR1D-int      | 1           |             |             |            |             |            |          |          |           |           |  |
| LTR/ERV1              | RMER21B         | 1           |             |             |            |             | 1          |          |          | 1         |           |  |
| LTR/ERV1              | RMER5-int       | 1           | 1           |             |            |             |            |          |          |           |           |  |
| LTR/ERV1              | MER67B          |             |             |             |            |             | 1          |          |          | 1         |           |  |
| LTR/ERV1              | RLTR24          |             |             |             |            |             | 1          |          |          | 1         |           |  |
| <b>LTR/ERV1 total</b> |                 | <b>7304</b> | <b>1742</b> | <b>1907</b> | <b>318</b> | <b>1178</b> | <b>156</b> | <b>3</b> | <b>9</b> | <b>11</b> | <b>64</b> |  |
| LTR/ERVK              | RLTR10-int      | 4557        | 1238        | 551         | 1192       | 138         | 256        | 23       | 7        | 118       | 12        |  |
| LTR/ERVK              | IAPLTR1a_Mm-int | 4021        | 914         | 598         | 1228       | 123         | 123        | 9        | 8        | 44        | 10        |  |
| LTR/ERVK              | IAPLTR1_Mm-int  | 2910        | 698         | 287         | 975        | 66          | 200        | 22       | 5        | 102       | 2         |  |
| LTR/ERVK              | RLTR10          | 1679        | 446         | 309         | 351        | 71          | 63         | 5        | 5        | 31        | 2         |  |
| LTR/ERVK              | MMERVK10C       | 1140        | 333         | 199         | 170        | 151         | 73         | 2        | 2        | 12        | 23        |  |
| LTR/ERVK              | IAP-d           | 606         | 113         | 176         | 55         | 92          | 35         | 1        | 3        | 1         | 14        |  |
| LTR/ERVK              | IAPLTR2_Mm-int  | 603         | 62          | 156         | 105        | 99          | 24         |          | 2        | 7         | 7         |  |
| LTR/ERVK              | IAPLTR2_Mm      | 462         | 53          | 115         | 39         | 118         | 16         |          |          | 3         | 4         |  |
| LTR/ERVK              | RLTR10A         | 390         | 37          | 136         | 25         | 36          | 9          | 1        | 1        |           | 2         |  |
| LTR/ERVK              | RLTRETN_Mm-int  | 367         | 40          | 54          | 45         | 102         | 34         | 1        | 3        | 6         | 15        |  |
| LTR/ERVK              | IAPEZ-int       | 342         | 72          | 70          | 71         | 24          | 14         |          |          | 5         | 7         |  |
| LTR/ERVK              | IAPLTR1_Mm      | 334         | 79          | 76          | 54         | 15          | 15         | 1        |          | 8         | 1         |  |
| LTR/ERVK              | RMER17A2        | 314         | 27          | 26          | 70         | 59          | 20         | 2        | 1        | 4         | 6         |  |
| LTR/ERVK              | RLTR10B2        | 283         | 4           | 58          | 1          | 143         | 14         |          | 3        |           | 6         |  |
| LTR/ERVK              | RLTR10A-int     | 222         | 47          | 47          | 43         | 24          | 10         | 3        | 1        | 2         |           |  |
| LTR/ERVK              | IAPLTR1a_Mm     | 221         | 50          | 27          | 44         | 14          | 5          |          | 1        | 2         | 2         |  |
| LTR/ERVK              | RLTRETN_Mm      | 207         | 22          | 41          | 4          | 57          | 14         |          | 2        | 1         | 5         |  |
| LTR/ERVK              | ETnERV          | 204         | 15          | 35          | 11         | 63          | 30         |          |          |           | 19        |  |
| LTR/ERVK              | IAPEY3-int      | 190         | 15          | 23          | 25         | 68          | 13         |          | 2        |           | 5         |  |
| LTR/ERVK              | IAPLTR2b-int    | 172         | 19          | 57          | 18         | 28          | 6          | 1        | 1        |           | 4         |  |
| LTR/ERVK              | RLTR27          | 132         | 1           | 13          |            | 78          | 7          |          | 1        |           | 5         |  |
| LTR/ERVK              | RLTR22_Mus      | 118         | 18          | 12          | 49         | 8           | 19         |          | 1        | 6         | 4         |  |
| LTR/ERVK              | MERVK26         | 112         |             | 17          |            | 45          | 10         |          |          |           | 6         |  |
| LTR/ERVK              | RLTR10C         | 111         | 16          | 28          | 5          | 22          | 3          |          |          | 1         |           |  |
| LTR/ERVK              | RMER19A         | 110         | 12          |             | 52         | 1           | 5          |          |          | 4         |           |  |
| LTR/ERVK              | RLTR9E          | 76          | 1           | 10          | 1          | 36          | 9          |          | 2        |           | 5         |  |
| LTR/ERVK              | RLTR13B1        | 65          | 2           | 10          |            | 25          | 9          |          |          |           | 6         |  |
| LTR/ERVK              | MurERV4         | 61          |             | 16          |            | 30          | 10         |          | 1        |           | 4         |  |
| LTR/ERVK              | RLTR13D5        | 54          |             | 5           | 1          | 34          | 9          |          |          |           | 7         |  |
| LTR/ERVK              | ETnERV2         | 51          | 1           | 6           | 7          | 18          | 7          | 1        |          |           | 3         |  |
| LTR/ERVK              | RMER17B         | 50          |             | 9           | 4          | 22          | 6          |          |          |           | 4         |  |
| LTR/ERVK              | RLTR10D         | 48          | 1           | 6           |            | 28          | 6          |          |          |           | 2         |  |
| LTR/ERVK              | IAPEY_LTR-int   | 44          | 1           | 7           | 3          | 21          | 10         | 1        |          |           | 5         |  |
| LTR/ERVK              | RMER4B          | 44          | 28          | 6           |            | 4           |            |          |          |           |           |  |
| LTR/ERVK              | MurERV4_19      | 39          | 4           |             | 17         |             |            |          |          |           |           |  |
| LTR/ERVK              | RLTR9A          | 38          |             | 3           |            | 20          | 10         |          | 1        |           | 7         |  |
| LTR/ERVK              | IAPLTR2b        | 34          | 3           | 7           | 4          | 5           | 3          | 1        |          |           |           |  |
| LTR/ERVK              | RLTR19-int      | 33          | 4           |             | 16         |             | 4          |          |          | 2         |           |  |
| LTR/ERVK              | IAPLTR2a-int    | 29          | 6           | 7           | 5          | 1           | 1          |          |          | 1         |           |  |
| LTR/ERVK              | RMER4A          | 29          | 22          | 1           | 2          |             |            |          |          |           |           |  |
| LTR/ERVK              | RLTR22_Mur      | 28          | 1           | 3           | 15         | 2           |            |          |          |           |           |  |
| LTR/ERVK              | RLTR44E         | 26          |             | 3           |            | 18          | 4          |          |          |           | 4         |  |
| LTR/ERVK              | IAPLTR4_I       | 25          |             | 11          |            | 6           | 1          |          | 1        |           |           |  |
| LTR/ERVK              | IAPLTR3-int     | 24          | 2           | 3           |            | 6           | 6          |          | 1        |           | 1         |  |
| LTR/ERVK              | RMER16          | 24          |             | 7           |            | 10          | 3          |          |          |           | 2         |  |
| LTR/ERVK              | RMER19B         | 22          | 6           |             | 6          | 3           | 3          |          |          | 1         |           |  |
| LTR/ERVK              | RLTR45          | 20          |             | 1           |            | 11          |            |          |          |           |           |  |
| LTR/ERVK              | RLTR9D          | 19          | 1           | 3           |            | 7           | 1          |          |          |           |           |  |
| LTR/ERVK              | RLTR21          | 18          |             | 1           |            | 10          | 2          |          |          |           |           |  |
| LTR/ERVK              | RMER16-int      | 17          | 1           | 2           | 2          | 5           | 3          |          |          |           | 1         |  |
| LTR/ERVK              | IAPEY3_LTR      | 15          | 2           | 6           |            | 3           | 1          |          |          |           | 1         |  |
| LTR/ERVK              | IAPEY2_LTR-int  | 14          |             | 3           |            | 9           | 4          |          |          |           | 3         |  |
| LTR/ERVK              | RLTR13A3        | 14          | 1           | 1           |            | 8           |            |          |          |           |           |  |
| LTR/ERVK              | RLTR45-int      | 13          | 1           |             | 4          | 3           |            |          |          |           |           |  |
| LTR/ERVK              | MMETn-int       | 11          | 1           | 3           | 1          | 5           |            |          |          |           |           |  |
| LTR/ERVK              | BGLII_B         | 10          | 1           |             |            | 5           | 3          |          |          |           | 2         |  |
| LTR/ERVK              | IAPEY2_LTR      | 10          |             |             |            | 4           | 1          |          |          |           |           |  |
| LTR/ERVK              | IAPEY3_LTR-int  | 10          | 2           | 1           | 1          | 2           | 4          |          | 1        |           | 2         |  |
| LTR/ERVK              | IAPLTR2a        | 10          | 1           | 3           | 1          | 3           |            |          |          |           |           |  |
| LTR/ERVK              | RLTR10E         | 10          | 1           |             |            | 6           | 1          |          |          |           | 1         |  |
| LTR/ERVK              | RMER17A         | 10          |             | 2           |            | 4           |            |          |          |           |           |  |
| LTR/ERVK              | RLTR16          | 9           |             |             | 1          |             |            |          |          |           |           |  |
| LTR/ERVK              | RMER17D         | 9           | 1           |             | 2          | 3           |            |          |          |           |           |  |
| LTR/ERVK              | RMER19C         | 9           | 1           |             | 3          | 1           | 2          | 1        |          | 1         |           |  |



|          |              |   |   |   |   |   |   |   |   |
|----------|--------------|---|---|---|---|---|---|---|---|
| LTR/ERVK | MYSERV       | 8 | 2 | 4 |   |   |   |   |   |
| LTR/ERVK | IAPLTR3      | 7 | 3 | 2 | 1 |   |   |   |   |
| LTR/ERVK | MYSERV16_I   | 7 | 1 | 3 |   |   |   |   |   |
| LTR/ERVK | RLTR8        | 7 | 4 |   |   | 2 |   |   |   |
| LTR/ERVK | RMER13B      | 7 |   | 2 | 1 |   |   |   |   |
| LTR/ERVK | ETnERV3      | 6 |   | 1 | 1 |   |   |   |   |
| LTR/ERVK | IAPLTR4-int  | 6 | 4 | 1 |   |   |   |   |   |
| LTR/ERVK | MYSERV6      | 6 | 1 | 1 |   |   | 1 |   |   |
| LTR/ERVK | RLTR17       | 6 |   | 1 | 1 |   |   |   |   |
| LTR/ERVK | RMER17C      | 6 | 2 | 1 |   | 1 |   |   |   |
| LTR/ERVK | BGLII        | 5 | 3 | 1 |   |   |   |   |   |
| LTR/ERVK | RLTR13B4     | 5 |   | 1 | 3 |   |   |   |   |
| LTR/ERVK | RLTR13D6     | 5 | 1 | 1 | 1 |   | 2 |   | 2 |
| LTR/ERVK | RLTR44-int   | 5 |   |   | 1 |   |   |   |   |
| LTR/ERVK | RMER20B      | 5 |   | 1 | 1 |   |   |   |   |
| LTR/ERVK | IAPLTR4      | 4 |   | 1 | 1 | 1 |   |   |   |
| LTR/ERVK | RLTR13C2     | 4 | 1 | 2 |   | 1 | 1 |   | 1 |
| LTR/ERVK | RLTR15       | 4 |   |   | 1 |   |   |   |   |
| LTR/ERVK | RLTR25A      | 4 |   |   | 2 |   |   |   |   |
| LTR/ERVK | RLTR27-int   | 4 |   | 1 | 1 |   |   |   |   |
| LTR/ERVK | RLTR42-int   | 4 | 1 |   | 2 | 1 | 1 |   |   |
| LTR/ERVK | RLTR44A-int  | 4 | 1 |   |   | 2 |   |   |   |
| LTR/ERVK | RLTR44C      | 4 |   | 1 |   |   |   |   |   |
| LTR/ERVK | RLTR46-int   | 4 | 3 | 1 |   |   | 1 |   |   |
| LTR/ERVK | RMER12       | 4 | 1 |   | 2 |   |   |   |   |
| LTR/ERVK | RMER13A      | 4 | 1 |   |   |   | 1 |   | 1 |
| LTR/ERVK | RMER17D2     | 4 |   | 1 |   | 3 | 1 |   | 1 |
| LTR/ERVK | RMER6D       | 4 | 4 |   |   |   |   |   |   |
| LTR/ERVK | RLTR12B      | 3 |   |   | 1 |   |   |   |   |
| LTR/ERVK | RLTR13A2     | 3 |   |   |   | 1 |   |   |   |
| LTR/ERVK | RLTR20A2     | 3 |   |   |   |   |   |   |   |
| LTR/ERVK | RLTR25B      | 3 |   | 1 |   |   |   |   |   |
| LTR/ERVK | RLTR31B_Mm   | 3 | 1 |   | 1 |   |   |   |   |
| LTR/ERVK | BGLII-int    | 2 |   |   |   |   |   |   |   |
| LTR/ERVK | RLTR12A      | 2 |   |   |   |   |   |   |   |
| LTR/ERVK | RLTR13D1     | 2 |   |   |   |   | 2 |   |   |
| LTR/ERVK | RLTR19       | 2 |   |   |   |   |   |   |   |
| LTR/ERVK | RLTR20A      | 2 |   |   | 1 |   |   |   |   |
| LTR/ERVK | RLTR20B3     | 2 | 1 |   |   |   |   |   |   |
| LTR/ERVK | RLTR31A_Mm   | 2 | 1 |   |   |   |   |   |   |
| LTR/ERVK | RLTR3_Mm-int | 2 |   | 1 |   |   |   |   |   |
| LTR/ERVK | RLTR44B      | 2 |   |   |   | 1 |   |   |   |
| LTR/ERVK | RLTR44E-int  | 2 |   |   |   |   | 1 |   | 1 |
| LTR/ERVK | RLTR9C       | 2 |   |   | 1 |   |   |   |   |
| LTR/ERVK | RNERVK23     | 2 |   |   | 1 |   |   |   |   |
| LTR/ERVK | BGLII_A      | 1 |   |   |   |   |   |   |   |
| LTR/ERVK | BGLII_B-int  | 1 |   |   |   |   |   |   |   |
| LTR/ERVK | BGLII_Mus    | 1 |   |   | 1 |   |   |   |   |
| LTR/ERVK | RLTR10B      | 1 |   |   |   |   |   |   |   |
| LTR/ERVK | RLTR11A      | 1 | 1 |   |   |   |   |   |   |
| LTR/ERVK | RLTR11B      | 1 |   |   |   |   | 1 |   | 1 |
| LTR/ERVK | RLTR13A      | 1 |   |   |   | 1 |   |   |   |
| LTR/ERVK | RLTR13B2     | 1 |   |   |   |   |   |   |   |
| LTR/ERVK | RLTR13D3     | 1 |   |   |   |   |   |   |   |
| LTR/ERVK | RLTR13D4     | 1 |   |   |   |   |   |   |   |
| LTR/ERVK | RLTR19B      | 1 |   |   |   |   |   |   |   |
| LTR/ERVK | RLTR20A1     | 1 |   |   | 1 |   |   |   |   |
| LTR/ERVK | RLTR20D      | 1 |   |   |   |   | 1 |   | 1 |
| LTR/ERVK | RLTR26       | 1 |   |   |   | 1 |   |   |   |
| LTR/ERVK | RLTR31_Mur   | 1 |   |   |   |   |   |   |   |
| LTR/ERVK | RLTR42       | 1 |   |   |   |   |   |   |   |
| LTR/ERVK | RLTR44A      | 1 |   |   |   |   | 1 |   | 1 |
| LTR/ERVK | RLTR44B-int  | 1 | 1 |   |   |   |   |   |   |
| LTR/ERVK | RLTR44D      | 1 |   |   | 1 |   |   |   |   |
| LTR/ERVK | RLTR9A2      | 1 |   |   |   |   |   | 1 |   |
| LTR/ERVK | RLTR9B       | 1 |   |   |   |   | 1 |   |   |
| LTR/ERVK | RLTR9F       | 1 | 1 |   |   |   |   |   |   |
| LTR/ERVK | RMER12B      | 1 |   |   |   |   |   |   |   |
| LTR/ERVK | RMER17B-int  | 1 |   |   |   |   |   |   |   |
| LTR/ERVK | RMER6B       | 1 |   |   |   |   |   |   |   |
| LTR/ERVK | SRV_MM-int   | 1 |   |   |   |   |   |   |   |

|                       |             |              |             |             |             |             |             |           |           |            |            |
|-----------------------|-------------|--------------|-------------|-------------|-------------|-------------|-------------|-----------|-----------|------------|------------|
| LTR/ERVK              | RMER17C-int |              |             |             |             | 2           |             | 1         |           |            |            |
| LTR/ERVK              | IAPEYLTR    |              |             |             |             | 1           |             | 1         |           |            |            |
| LTR/ERVK              | RLTR20C     |              |             |             |             | 1           |             |           |           |            |            |
| LTR/ERVK              | RLTR13C1    |              |             |             |             | 1           |             | 1         |           |            |            |
| <b>LTR/ERVK total</b> |             | <b>21087</b> | <b>4466</b> | <b>3272</b> | <b>4759</b> | <b>2052</b> | <b>1158</b> | <b>75</b> | <b>59</b> | <b>366</b> | <b>226</b> |
| LTR/ERVL              | MT2_Mm      | 535          | 116         | 85          | 99          | 62          | 32          | 2         |           | 13         | 3          |
| LTR/ERVL              | MERVL-_Mm   | 347          | 54          | 61          | 87          | 42          | 12          | 2         |           | 2          |            |
| LTR/ERVL              | MT2C_Mm     | 258          | 12          | 67          | 8           | 103         | 7           |           | 2         | 1          | 1          |
| LTR/ERVL              | RMER15-int  | 15           |             |             |             | 8           | 1           |           |           |            |            |
| LTR/ERVL              | MT2A        | 12           | 2           |             | 1           | 2           | 1           |           |           |            | 1          |
| LTR/ERVL              | RMER15      | 9            | 2           | 1           |             | 2           |             |           |           |            |            |
| LTR/ERVL              | MERVL       | 8            | 2           | 1           | 1           | 2           |             |           |           |            |            |
| LTR/ERVL              | MERVL-C_Mm  | 6            |             | 1           | 1           |             |             |           |           |            |            |
| LTR/ERVL              | MT2B2       | 6            | 2           | 1           | 1           | 1           |             |           |           |            |            |
| LTR/ERVL              | MERVL-A     | 5            | 2           | 1           |             |             |             |           |           |            |            |
| LTR/ERVL              | MT2B        | 4            | 1           | 2           |             |             |             |           |           |            |            |
| LTR/ERVL              | MERVL-B     | 3            |             |             | 3           |             |             |           |           |            |            |
| LTR/ERVL              | MERVL_2A    | 3            |             | 1           |             |             | 1           |           |           |            |            |
| LTR/ERVL              | RLTR28      | 3            |             |             |             |             |             |           |           |            |            |
| LTR/ERVL              | RMER10B     | 3            | 3           |             |             |             |             |           |           |            |            |
| LTR/ERVL              | MER54A      | 2            |             |             |             |             |             |           |           |            |            |
| LTR/ERVL              | MER70B      | 2            |             |             |             |             |             |           |           |            |            |
| LTR/ERVL              | MER74A      | 2            |             |             |             | 1           |             |           |           |            |            |
| LTR/ERVL              | MLT2B4      | 2            |             | 1           | 1           |             |             |           |           |            |            |
| LTR/ERVL              | ERVL        | 1            |             |             |             |             |             |           |           |            |            |
| LTR/ERVL              | ERVL-B4     | 1            |             |             |             |             |             |           |           |            |            |
| LTR/ERVL              | HERV16      | 1            |             |             | 1           |             |             |           |           |            |            |
| LTR/ERVL              | HERV40      | 1            |             |             |             |             |             |           |           |            |            |
| LTR/ERVL              | LTR16A1     | 1            |             |             |             |             |             |           |           |            |            |
| LTR/ERVL              | LTR16C      | 1            |             |             |             |             |             |           |           |            |            |
| LTR/ERVL              | LTR16D      | 1            |             |             |             | 1           |             |           |           |            |            |
| LTR/ERVL              | LTR40a      | 1            |             |             |             | 1           |             |           |           |            |            |
| LTR/ERVL              | MER68       | 1            |             |             |             |             |             |           |           |            |            |
| LTR/ERVL              | MERVL-B4    | 1            |             |             |             | 1           |             |           |           |            |            |
| LTR/ERVL              | RMER10A     | 1            |             |             |             |             |             |           |           |            |            |
| <b>LTR/ERVL total</b> |             | <b>1236</b>  | <b>196</b>  | <b>222</b>  | <b>203</b>  | <b>226</b>  | <b>54</b>   | <b>4</b>  | <b>2</b>  | <b>16</b>  | <b>5</b>   |
| LTR/MaLR              | MTA_Mm-int  | 7813         | 3021        | 1409        | 1213        | 124         | 87          | 10        | 12        | 21         | 7          |
| LTR/MaLR              | MTC         | 7620         | 142         | 6949        | 13          | 8           | 2           |           |           |            |            |
| LTR/MaLR              | MTA_Mm      | 7418         | 2252        | 1748        | 949         | 377         | 58          | 1         | 2         | 27         |            |
| LTR/MaLR              | MTB_Mm      | 400          | 263         | 22          | 4           | 6           | 2           |           |           |            | 1          |
| LTR/MaLR              | MTB         | 344          | 46          | 107         | 17          | 52          | 5           | 1         |           | 1          | 2          |
| LTR/MaLR              | MTC-int     | 164          | 21          | 5           | 78          |             | 2           |           |           | 2          |            |
| LTR/MaLR              | MTD         | 118          | 9           | 41          | 7           | 7           | 5           |           | 2         | 2          |            |
| LTR/MaLR              | MTB-int     | 65           | 18          | 21          | 3           | 1           |             |           |           |            |            |
| LTR/MaLR              | ORR1E       | 64           |             | 1           | 2           | 1           | 1           |           |           |            |            |
| LTR/MaLR              | ORR1A2-int  | 54           | 15          | 10          | 8           |             | 1           |           |           | 1          |            |
| LTR/MaLR              | ORR1A2      | 48           | 13          | 6           | 6           | 4           | 2           |           |           | 1          |            |
| LTR/MaLR              | ORR1A0-int  | 33           | 4           | 2           | 11          | 2           | 5           |           |           | 2          |            |
| LTR/MaLR              | ORR1A1-int  | 25           | 5           | 7           | 3           |             | 3           |           |           |            |            |
| LTR/MaLR              | ORR1A3-int  | 22           |             | 6           |             | 9           | 3           |           |           |            | 2          |
| LTR/MaLR              | ORR1D1      | 20           |             | 2           | 1           | 10          | 1           |           |           |            |            |
| LTR/MaLR              | MTB_Mm-int  | 16           | 9           | 4           | 2           |             |             |           |           |            |            |
| LTR/MaLR              | ORR1A0      | 13           | 7           |             |             | 1           |             |           |           |            |            |
| LTR/MaLR              | MLT1G3      | 12           |             |             |             |             |             |           |           |            |            |
| LTR/MaLR              | ORR1A4-int  | 12           | 5           | 1           | 3           |             | 1           |           | 1         |            |            |
| LTR/MaLR              | ORR1A4      | 11           | 1           | 1           |             | 6           | 3           |           |           |            | 3          |
| LTR/MaLR              | ORR1B1      | 10           |             |             | 2           | 1           | 2           |           |           | 1          | 1          |
| LTR/MaLR              | MTE2a       | 9            |             |             | 2           | 3           |             |           |           |            |            |
| LTR/MaLR              | MT-int      | 8            | 2           | 1           | 1           |             |             |           |           |            |            |
| LTR/MaLR              | MTEb        | 8            |             | 1           | 1           | 2           | 1           |           |           |            | 1          |
| LTR/MaLR              | ORR1D2      | 8            |             |             |             | 3           |             |           |           |            |            |
| LTR/MaLR              | MTE2b       | 7            |             |             | 1           | 3           |             |           |           |            |            |
| LTR/MaLR              | MTEa        | 7            | 1           | 1           | 1           | 2           | 2           |           |           |            | 1          |
| LTR/MaLR              | ORR1B1-int  | 7            | 2           |             | 1           |             |             |           |           |            |            |
| LTR/MaLR              | MTD-int     | 6            | 2           |             | 3           |             | 1           |           |           | 1          |            |
| LTR/MaLR              | MLT1D       | 5            |             |             | 2           |             |             |           |           |            |            |
| LTR/MaLR              | ORR1B2      | 5            | 1           |             |             |             |             |           |           |            |            |
| LTR/MaLR              | ORR1D1-int  | 5            | 1           |             | 1           |             |             |           |           |            |            |
| LTR/MaLR              | MLT1C       | 4            | 1           |             |             |             | 1           |           |           |            | 1          |
| LTR/MaLR              | ORR1C1      | 4            | 2           |             | 2           |             |             |           |           |            |            |
| LTR/MaLR              | ORR1C2      | 4            |             |             | 1           |             | 1           |           |           |            |            |

|                        |            |              |             |              |             |            |            |           |           |           |           |
|------------------------|------------|--------------|-------------|--------------|-------------|------------|------------|-----------|-----------|-----------|-----------|
| LTR/MaLR               | MLT1F      | 3            |             |              | 1           |            |            |           |           |           |           |
| LTR/MaLR               | MTEa-int   | 3            |             |              |             |            |            |           |           |           |           |
| LTR/MaLR               | ORR1A1     | 3            | 1           |              |             |            | 2          |           |           | 1         |           |
| LTR/MaLR               | ORR1A3     | 3            |             | 1            |             | 1          |            |           |           |           |           |
| LTR/MaLR               | ORR1C1-int | 3            |             |              | 1           |            |            |           |           |           |           |
| LTR/MaLR               | MLT1A      | 2            |             | 1            | 1           |            |            | 1         |           |           |           |
| LTR/MaLR               | MLT1A0     | 2            |             |              |             | 1          |            | 2         |           | 1         | 1         |
| LTR/MaLR               | MLT1A1     | 2            | 1           |              |             |            |            |           |           |           |           |
| LTR/MaLR               | MLT1E-int  | 2            |             |              |             |            |            |           |           |           |           |
| LTR/MaLR               | MLT1E1     | 2            | 1           |              |             |            |            | 1         |           | 1         |           |
| LTR/MaLR               | MLT1E3     | 2            |             |              |             |            |            |           |           |           |           |
| LTR/MaLR               | MLT1I      | 2            |             |              | 2           |            |            |           |           |           |           |
| LTR/MaLR               | ORR1C2-int | 2            |             |              |             |            |            |           |           |           |           |
| LTR/MaLR               | ORR1E-int  | 2            | 1           |              | 1           |            |            |           |           |           |           |
| LTR/MaLR               | MLT1B      | 1            |             |              | 1           |            |            |           |           |           |           |
| LTR/MaLR               | MLT1E      | 1            |             |              |             | 1          |            | 1         |           | 1         |           |
| LTR/MaLR               | MLT1E2     | 1            |             |              |             |            |            |           |           |           |           |
| LTR/MaLR               | MLT1F1     | 1            |             |              |             |            |            |           |           |           |           |
| LTR/MaLR               | MLT1H      | 1            |             |              | 1           |            |            |           |           |           |           |
| LTR/MaLR               | MTE2a-int  | 1            |             |              |             | 1          |            |           |           |           |           |
| <b>LTR/MaLR total</b>  |            | <b>24408</b> | <b>5847</b> | <b>10347</b> | <b>2346</b> | <b>626</b> | <b>196</b> | <b>12</b> | <b>17</b> | <b>63</b> | <b>20</b> |
| Other                  | RMER1B     | 15           |             |              | 1           | 2          |            |           |           |           |           |
| Other                  | RMER1A     | 4            |             |              | 1           | 1          |            |           |           |           |           |
| Other                  | RMER1C     | 4            |             | 1            |             | 1          | 1          |           |           |           |           |
| <b>Other total</b>     |            | <b>23</b>    | <b>0</b>    | <b>1</b>     | <b>2</b>    | <b>4</b>   | <b>1</b>   | <b>0</b>  | <b>0</b>  | <b>0</b>  | <b>0</b>  |
| Satellite              | MMSAT4     | 10           | 2           |              | 4           |            | 3          |           |           | 2         |           |
| Satellite              | ZP3AR      | 2            |             | 1            |             |            |            |           |           |           |           |
| <b>Satellite total</b> |            | <b>12</b>    | <b>2</b>    | <b>1</b>     | <b>4</b>    | <b>0</b>   | <b>3</b>   | <b>0</b>  | <b>0</b>  | <b>2</b>  | <b>0</b>  |
| Simple_repeat          | (CCA)n     | 18           | 3           |              | 1           |            |            |           |           |           |           |
| Simple_repeat          | (TG)n      | 13           | 3           | 1            |             | 6          |            |           |           |           |           |
| Simple_repeat          | (CA)n      | 8            | 4           |              | 2           | 1          | 1          |           |           | 1         |           |
| Simple_repeat          | (CGG)n     | 8            | 3           | 3            | 1           |            |            |           |           |           |           |
| Simple_repeat          | (CAG)n     | 7            | 2           |              |             | 2          | 1          |           |           |           | 1         |
| Simple_repeat          | (CTG)n     | 6            | 3           | 1            | 1           | 1          |            |           |           |           |           |
| Simple_repeat          | (CAA)n     | 5            |             |              |             | 3          |            |           |           |           |           |
| Simple_repeat          | (GA)n      | 4            |             |              |             |            |            |           |           |           |           |
| Simple_repeat          | (TGG)n     | 4            |             |              |             |            |            |           |           |           |           |
| Simple_repeat          | (ATG)n     | 3            | 1           |              | 1           |            |            |           |           |           |           |
| Simple_repeat          | (CACCT)n   | 3            |             |              | 2           |            |            |           |           |           |           |
| Simple_repeat          | (CAT)n     | 3            | 1           |              |             |            |            |           |           |           |           |
| Simple_repeat          | (CCG)n     | 3            | 1           |              | 1           |            |            |           |           |           |           |
| Simple_repeat          | (TCC)n     | 3            |             | 1            |             |            |            |           |           |           |           |
| Simple_repeat          | (TTT)n     | 3            |             |              |             |            |            |           |           |           |           |
| Simple_repeat          | (CATATA)n  | 2            |             |              |             |            |            |           |           |           |           |
| Simple_repeat          | (CCCCAG)n  | 2            |             |              | 1           |            |            |           |           |           |           |
| Simple_repeat          | (TA)n      | 2            |             | 1            |             | 1          |            |           |           |           |           |
| Simple_repeat          | (TC)n      | 2            |             |              |             | 1          |            |           |           |           |           |
| Simple_repeat          | (TTTC)n    | 2            |             |              |             |            |            |           |           |           |           |
| Simple_repeat          | (ACTG)n    | 1            |             |              |             |            |            |           |           |           |           |
| Simple_repeat          | (ATGGTG)n  | 1            |             |              |             |            |            |           |           |           |           |
| Simple_repeat          | (ATTG)n    | 1            |             |              |             | 1          |            |           |           |           |           |
| Simple_repeat          | (CAAAA)n   | 1            |             |              |             |            |            |           |           |           |           |
| Simple_repeat          | (CACAG)n   | 1            |             |              |             | 1          |            |           |           |           |           |
| Simple_repeat          | (CACG)n    | 1            |             |              |             |            |            |           |           |           |           |
| Simple_repeat          | (CAGA)n    | 1            |             |              |             |            |            |           |           |           |           |
| Simple_repeat          | (CAGAG)n   | 1            |             |              | 1           |            |            |           |           |           |           |
| Simple_repeat          | (CAGAGA)n  | 1            |             |              |             |            |            |           |           |           |           |
| Simple_repeat          | (CAGG)n    | 1            |             |              |             | 1          |            |           |           |           |           |
| Simple_repeat          | (CATA)n    | 1            |             |              |             |            |            |           |           |           |           |
| Simple_repeat          | (CCCCA)n   | 1            | 1           |              |             |            |            |           |           |           |           |
| Simple_repeat          | (CCCG)n    | 1            |             |              |             |            |            |           |           |           |           |
| Simple_repeat          | (CCCGG)n   | 1            |             | 1            |             |            |            |           |           |           |           |
| Simple_repeat          | (CCGCG)n   | 1            |             |              |             |            |            |           |           |           |           |
| Simple_repeat          | (CCTG)n    | 1            |             |              | 1           |            |            |           |           |           |           |
| Simple_repeat          | (CGGAG)n   | 1            | 1           |              |             |            |            |           |           |           |           |
| Simple_repeat          | (CGGG)n    | 1            | 1           |              |             |            |            |           |           |           |           |
| Simple_repeat          | (CGGGG)n   | 1            |             |              |             |            |            |           |           |           |           |
| Simple_repeat          | (CTA)n     | 1            |             |              |             |            |            |           |           |           |           |
| Simple_repeat          | (CTGTG)n   | 1            |             |              |             |            |            |           |           |           |           |
| Simple_repeat          | (G)n       | 1            |             |              |             |            |            |           |           |           |           |
| Simple_repeat          | (GGA)n     | 1            | 1           |              |             |            |            |           |           |           |           |

|                            |            |              |              |              |              |             |             |            |            |            |            |
|----------------------------|------------|--------------|--------------|--------------|--------------|-------------|-------------|------------|------------|------------|------------|
| Simple_repeat              | (GGAA)n    | 1            |              |              |              |             |             |            |            |            |            |
| Simple_repeat              | (TCG)n     | 1            |              |              |              |             |             |            |            |            |            |
| Simple_repeat              | (TCTCTG)n  | 1            |              |              |              |             |             |            |            |            |            |
| Simple_repeat              | (TCTG)n    | 1            | 1            |              |              |             |             |            |            |            |            |
| Simple_repeat              | (TGAG)n    | 1            |              |              |              | 1           |             |            |            |            |            |
| Simple_repeat              | (A)n       |              |              |              |              |             |             |            | 1          |            |            |
| Simple_repeat              | (CAA)n     |              |              |              |              |             |             |            | 1          |            |            |
| Simple_repeat              | (TTG)n     |              |              |              |              |             |             |            | 1          |            |            |
| <b>Simple_repeat total</b> |            | <b>129</b>   | <b>25</b>    | <b>9</b>     | <b>12</b>    | <b>19</b>   | <b>5</b>    | <b>0</b>   | <b>1</b>   | <b>1</b>   | <b>1</b>   |
| SINE/Alu                   | B1_Mus1    | 445          | 123          | 79           | 48           | 43          | 26          | 2          | 6          | 3          | 3          |
| SINE/Alu                   | B1_Mus2    | 192          | 28           | 23           | 37           | 16          | 10          | 1          | 2          | 1          | 1          |
| SINE/Alu                   | B1_Mm      | 139          | 30           | 32           | 24           | 6           | 13          | 1          | 1          | 4          |            |
| SINE/Alu                   | B1_Mur3    | 53           | 7            | 4            | 15           | 5           | 2           |            |            | 1          | 1          |
| SINE/Alu                   | B1_Mur4    | 36           | 6            | 9            | 4            | 5           | 3           |            | 1          |            | 1          |
| SINE/Alu                   | PB1D10     | 33           | 1            | 2            | 10           | 5           | 2           |            |            |            |            |
| SINE/Alu                   | B1_Mur2    | 22           |              | 4            | 3            | 5           | 8           |            | 1          |            | 3          |
| SINE/Alu                   | B1F        | 22           | 3            |              | 2            | 6           | 4           |            |            |            | 3          |
| SINE/Alu                   | B1_Mur1    | 19           |              | 2            | 5            | 1           | 10          |            |            | 2          | 1          |
| SINE/Alu                   | PB1D7      | 17           | 2            | 3            | 1            | 6           | 3           |            |            |            | 1          |
| SINE/Alu                   | B1F2       | 13           | 1            | 1            | 5            | 1           | 4           |            |            |            |            |
| SINE/Alu                   | PB1        | 11           | 3            |              | 2            |             | 2           |            |            |            | 1          |
| SINE/Alu                   | B1F1       | 9            |              | 2            | 1            | 3           | 1           |            |            |            |            |
| SINE/Alu                   | PB1D9      | 8            |              | 1            | 1            | 2           |             |            |            |            |            |
| <b>SINE/Alu total</b>      |            | <b>1019</b>  | <b>204</b>   | <b>162</b>   | <b>158</b>   | <b>104</b>  | <b>88</b>   | <b>4</b>   | <b>11</b>  | <b>11</b>  | <b>15</b>  |
| SINE/B2                    | B3         | 220          | 136          | 2            | 15           | 13          | 17          |            |            | 6          | 4          |
| SINE/B2                    | B2_Mm2     | 79           | 25           | 19           | 7            | 3           | 13          | 1          |            | 3          | 1          |
| SINE/B2                    | B3A        | 49           | 7            | 2            | 6            | 7           | 4           |            |            |            |            |
| SINE/B2                    | B2_Mm1a    | 20           | 4            | 3            | 4            | 1           | 6           | 1          | 1          |            | 2          |
| SINE/B2                    | B2_Mm1t    | 19           | 7            | 6            |              | 1           | 5           |            |            |            | 3          |
| <b>SINE/B2 total</b>       |            | <b>387</b>   | <b>179</b>   | <b>32</b>    | <b>32</b>    | <b>25</b>   | <b>45</b>   | <b>2</b>   | <b>1</b>   | <b>9</b>   | <b>10</b>  |
| SINE/B4                    | B4A        | 71           | 5            | 28           | 5            | 4           | 21          | 1          |            |            | 5          |
| SINE/B4                    | ID_B1      | 69           | 6            | 10           | 8            | 15          | 9           |            |            |            | 4          |
| SINE/B4                    | RSINE1     | 37           | 5            | 3            | 2            | 7           | 5           | 1          | 1          |            |            |
| SINE/B4                    | B4         | 26           | 1            | 2            | 5            | 9           | 7           |            |            | 1          | 4          |
| <b>SINE/B4 total</b>       |            | <b>203</b>   | <b>17</b>    | <b>43</b>    | <b>20</b>    | <b>35</b>   | <b>42</b>   | <b>2</b>   | <b>1</b>   | <b>1</b>   | <b>13</b>  |
| SINE/ID                    | ID4_       | 11           | 1            |              | 2            | 5           |             |            |            |            |            |
| SINE/ID                    | ID4        | 7            |              | 2            |              | 2           | 1           |            |            |            |            |
| SINE/ID                    | ID         | 4            |              |              | 1            |             |             |            |            |            |            |
| SINE/ID                    | ID2        |              |              |              |              |             | 1           |            |            |            | 1          |
| <b>SINE/ID total</b>       |            | <b>22</b>    | <b>1</b>     | <b>2</b>     | <b>3</b>     | <b>7</b>    | <b>2</b>    | <b>0</b>   | <b>0</b>   | <b>0</b>   | <b>1</b>   |
| SINE/MIR                   | MIRb       | 16           | 1            | 1            | 4            | 2           | 5           |            |            |            | 2          |
| SINE/MIR                   | MIR        | 15           | 2            | 1            | 5            |             | 1           |            |            |            | 1          |
| SINE/MIR                   | MIR3       | 5            |              | 1            |              |             |             |            |            |            |            |
| SINE/MIR                   | MIRm       | 4            |              |              |              | 1           |             |            |            |            |            |
| SINE/MIR                   | MIR_Mars   | 3            |              | 1            |              |             |             |            |            |            |            |
| SINE/MIR                   | THER1_MD   | 1            |              |              |              |             |             |            |            |            |            |
| <b>SINE/MIR total</b>      |            | <b>44</b>    | <b>3</b>     | <b>4</b>     | <b>9</b>     | <b>3</b>    | <b>6</b>    | <b>0</b>   | <b>0</b>   | <b>0</b>   | <b>3</b>   |
| Unknown                    | MurSatRep1 | 9            | 1            |              | 4            |             |             |            |            |            |            |
| <b>Unknown total</b>       |            | <b>9</b>     | <b>1</b>     | <b>0</b>     | <b>4</b>     | <b>0</b>    | <b>0</b>    | <b>0</b>   | <b>0</b>   | <b>0</b>   | <b>0</b>   |
| <b>Total</b>               |            | <b>72828</b> | <b>15382</b> | <b>19280</b> | <b>10048</b> | <b>7452</b> | <b>2331</b> | <b>135</b> | <b>143</b> | <b>568</b> | <b>519</b> |

Supplementary Table 3. Small RNA clusters in mouse oocytes

| #  | Chr   | Genomic position (UCSC mm8) | strand | No. of small RNAs |       |          |          | Class of cluster                  |
|----|-------|-----------------------------|--------|-------------------|-------|----------|----------|-----------------------------------|
|    |       |                             |        | kind              | clone |          |          |                                   |
|    |       |                             |        |                   | total | 19-23 nt | 24-28 nt |                                   |
| 1  | chr10 | 82789601-82918207           | +      | 3654              | 4816  | 1548     | 2993     | piRNA                             |
| 2  | chr10 | 117640185-117677987         | +/-    | 1970              | 2630  | 1101     | 1376     | piRNA                             |
| 3  | chr12 | 68565038-68604191           | +      | 1327              | 2220  | 698      | 1387     | piRNA                             |
| 4  | chr10 | 23296600-23350790           | +/-    | 637               | 983   | 715      | 211      | hp-siRNA piRNA                    |
| 5  | chr17 | 12661727-12663173           | +/-    | 485               | 979   | 928      | 4        | hp-siRNA                          |
| 6  | chr10 | 43898893-43918070           | +      | 201               | 289   | 84       | 194      | piRNA                             |
| 7  | chr4  | 56961570-56982731           | -      | 196               | 225   | 93       | 113      | piRNA                             |
| 8  | chr9  | 120636483-120636924         | -      | 167               | 7306  | 7215     | 7        | (hp-siRNA) <sup>1</sup>           |
| 9  | chr17 | 5728780-5735259             | +      | 151               | 194   | 76       | 103      | piRNA                             |
| 10 | chr11 | 91737385-91742415           | +/-    | 144               | 194   | 82       | 95       |                                   |
| 11 | chr7  | 75642809-75654236           | -      | 143               | 167   | 36       | 120      | piRNA                             |
| 12 | chr9  | 72892591-72910671           | +      | 137               | 165   | 49       | 100      | piRNA                             |
| 13 | chr5  | 137948929-137951678         | +/-    | 126               | 136   | 122      | 4        |                                   |
| 14 | chrX  | 96828731-96829310           | +/-    | 117               | 135   | 126      | 0        | cis-nat-siRNA                     |
| 15 | chr10 | 26385021-26438068           | +      | 112               | 146   | 43       | 91       | piRNA                             |
| 16 | chr2  | 4936975-4938574             | +/-    | 109               | 152   | 145      | 0        | hp-siRNA                          |
| 17 | chr7  | 6177907-6256415             | -      | 94                | 108   | 29       | 72       | piRNA                             |
| 19 | chr9  | 51583810-51592553           | +/-    | 86                | 239   | 227      | 5        | piRNA                             |
| 18 | chr17 | 26648484-26664411           | +/-    | 86                | 148   | 142      | 2        |                                   |
| 20 | chr8  | 72590252-72654897           | -      | 85                | 98    | 28       | 66       | piRNA                             |
| 21 | chr13 | 50650072-50654460           | +/-    | 74                | 103   | 54       | 42       | piRNA                             |
| 22 | chr12 | 17091603-17238365           | +/-    | 70                | 87    | 28       | 53       | piRNA                             |
| 23 | chr8  | 102034513-102037171         | +/-    | 69                | 77    | 73       | 1        | trans-nat-siRNA (27) <sup>2</sup> |
| 24 | chr3  | 96347880-96358820           | +/-    | 68                | 81    | 65       | 15       |                                   |
| 25 | chr9  | 114357265-114364731         | +/-    | 68                | 76    | 66       | 4        | cis-nat-siRNA piRNA               |
| 26 | chr9  | 69155319-69165534           | -      | 67                | 82    | 44       | 35       | piRNA                             |
| 27 | chr17 | 65702757-65789029           | +/-    | 63                | 72    | 65       | 4        | trans-nat-siRNA (23) piRNA        |
| 28 | chr14 | 104076918-104093492         | +/-    | 61                | 69    | 58       | 5        | trans-nat-siRNA (36) piRNA        |
| 29 | chr10 | 11373862-11392299           | +/-    | 59                | 73    | 36       | 34       |                                   |
| 30 | chr5  | 114103753-114204341         | +/-    | 58                | 60    | 54       | 4        | cis-nat-siRNA                     |
| 31 | chr9  | 71397396-71412177           | +      | 56                | 61    | 37       | 22       |                                   |
| 32 | chr12 | 81255978-81259024           | +/-    | 55                | 73    | 37       | 30       |                                   |
| 33 | chrX  | 63037425-63071159           | -      | 54                | 169   | 161      | 1        |                                   |
| 34 | chr3  | 51314104-51329858           | +      | 51                | 60    | 11       | 46       | piRNA                             |
| 35 | chr1  | 133805031-133859700         | +      | 51                | 55    | 15       | 39       | piRNA                             |
| 36 | chr14 | 73933479-73963644           | +/-    | 47                | 51    | 46       | 1        | trans-nat-siRNA (28)              |
| 37 | chr8  | 120091309-120100997         | +      | 46                | 52    | 11       | 39       | piRNA                             |
| 38 | chr2  | 152105312-152106270         | +/-    | 45                | 53    | 52       | 0        | cis-nat-siRNA                     |
| 39 | chr6  | 94383256-94384938           | +/-    | 45                | 46    | 42       | 1        |                                   |
| 40 | chr18 | 6545990-6551168             | +/-    | 43                | 59    | 32       | 25       |                                   |
| 41 | chr5  | 134841245-134845867         | +      | 43                | 49    | 7        | 39       | piRNA                             |
| 42 | chr8  | 26918337-26920176           | +/-    | 42                | 51    | 46       | 1        |                                   |
| 43 | chr6  | 12062918-12066410           | +      | 41                | 59    | 24       | 35       |                                   |
| 44 | chr16 | 55973878-55985107           | +/-    | 41                | 43    | 21       | 21       |                                   |
| 45 | chr9  | 107809098-107905674         | +/-    | 38                | 49    | 38       | 9        | trans-nat-siRNA (70) piRNA        |
| 46 | chr1  | 21336888-21371325           | +/-    | 38                | 44    | 39       | 3        |                                   |
| 47 | chr7  | 142706327-142740466         | -      | 38                | 43    | 11       | 30       | piRNA                             |
| 48 | chr18 | 34545947-34546947           | +/-    | 36                | 45    | 45       | 0        |                                   |
| 49 | chr11 | 40538801-40551528           | -      | 36                | 45    | 27       | 18       |                                   |
| 50 | chr12 | 81366581-81378202           | -      | 36                | 40    | 19       | 20       | piRNA                             |
| 51 | chr7  | 46835269-46843697           | -      | 35                | 40    | 37       | 2        |                                   |

|     |       |                     |     |    |     |     |    |                       |
|-----|-------|---------------------|-----|----|-----|-----|----|-----------------------|
| 52  | chr1  | 158478810-158485558 | +   | 35 | 38  | 10  | 26 | piRNA                 |
| 53  | chr5  | 30418401-30436754   | +/- | 35 | 37  | 34  | 0  | trans-nat-siRNA (98)  |
| 54  | chr8  | 13100313-13119892   | +   | 35 | 36  | 10  | 22 |                       |
| 55  | chr13 | 7235082-7235113     | +/- | 33 | 53  | 22  | 25 |                       |
| 56  | chr1  | 87414685-87432169   | +/- | 33 | 36  | 32  | 2  |                       |
| 57  | chr1  | 134811729-134819209 | -   | 33 | 36  | 11  | 25 | piRNA                 |
| 58  | chr2  | 4750393-4755465     | +/- | 33 | 33  | 32  | 1  | trans-nat-siRNA (113) |
| 59  | chr6  | 92115112-92137605   | +   | 32 | 34  | 10  | 18 | piRNA                 |
| 60  | chr7  | 4721830-4731169     | +/- | 32 | 32  | 26  | 4  |                       |
| 61  | chr18 | 13101545-13114997   | +   | 29 | 35  | 8   | 22 |                       |
| 62  | chr6  | 5190821-5209596     | -   | 29 | 33  | 12  | 21 |                       |
| 63  | chr11 | 20724935-20730342   | +/- | 29 | 31  | 28  | 1  | trans-nat-siRNA (76)  |
| 64  | chr7  | 142390136-142391477 | +/- | 28 | 54  | 23  | 20 |                       |
| 65  | chr16 | 15365996-15374973   | +/- | 28 | 33  | 23  | 9  |                       |
| 66  | chr12 | 98618839-98620440   | +/- | 28 | 30  | 21  | 8  |                       |
| 67  | chr11 | 3807801-3903952     | +/- | 28 | 30  | 24  | 4  |                       |
| 68  | chrX  | 119194985-119199429 | +/- | 27 | 42  | 26  | 13 |                       |
| 69  | chr12 | 88704274-88709701   | +/- | 27 | 40  | 11  | 28 |                       |
| 70  | chr2  | 6050173-6051282     | +/- | 27 | 32  | 28  | 0  | trans-nat-siRNA (45)  |
| 71  | chr12 | 100365867-100381179 | +/- | 27 | 27  | 21  | 5  |                       |
| 72  | chr16 | 94460947-94468144   | +/- | 27 | 27  | 24  | 3  |                       |
| 73  | chr6  | 120852611-120941581 | +   | 26 | 32  | 8   | 21 |                       |
| 74  | chr13 | 47019741-47021917   | +/- | 26 | 30  | 29  | 1  |                       |
| 75  | chr10 | 127092173-127103365 | +   | 26 | 29  | 6   | 22 |                       |
| 76  | chr7  | 67463293-67469209   | +/- | 26 | 29  | 25  | 2  | trans-nat-siRNA (63)  |
| 77  | chr6  | 83328817-83341495   | -   | 26 | 29  | 7   | 20 |                       |
| 78  | chr14 | 23274157-23289711   | -   | 26 | 28  | 7   | 19 | piRNA                 |
| 79  | chr14 | 48088967-48178294   | +/- | 26 | 28  | 24  | 2  | cis-nat-siRNA         |
| 80  | chr14 | 99971053-99979397   | +/- | 25 | 44  | 40  | 2  |                       |
| 81  | chr17 | 4355914-4359443     | +/- | 25 | 29  | 13  | 15 |                       |
| 82  | chr6  | 95209508-95276509   | +/- | 25 | 27  | 23  | 3  | cis-nat-siRNA piRNA   |
| 83  | chr2  | 61664560-61669772   | +/- | 24 | 33  | 9   | 23 |                       |
| 84  | chr8  | 126304234-126307701 | +/- | 24 | 28  | 28  | 0  | cis-nat-siRNA         |
| 85  | chr6  | 136363113-136365436 | +/- | 24 | 27  | 24  | 2  |                       |
| 86  | chr17 | 20683993-20699062   | +/- | 24 | 26  | 10  | 14 |                       |
| 87  | chr15 | 64993143-65005963   | +/- | 24 | 26  | 5   | 19 |                       |
| 88  | chr3  | 95268019-95291969   | -   | 24 | 24  | 9   | 14 | piRNA                 |
| 89  | chr1  | 178671614-178672755 | +/- | 23 | 24  | 23  | 0  | cis-nat-siRNA         |
| 90  | chr13 | 10738676-10740678   | -   | 23 | 24  | 8   | 11 |                       |
| 91  | chr15 | 95901456-95903957   | -   | 22 | 24  | 16  | 7  |                       |
| 92  | chr6  | 113675860-113694543 | +   | 22 | 23  | 5   | 18 | piRNA                 |
| 93  | chr2  | 167165313-167176760 | +/- | 22 | 23  | 2   | 19 | piRNA                 |
| 94  | chr2  | 5464350-5465948     | -   | 21 | 25  | 22  | 2  |                       |
| 95  | chr5  | 129335255-129342749 | +/- | 21 | 23  | 21  | 1  |                       |
| 96  | chr15 | 72923976-72933199   | -   | 21 | 22  | 10  | 10 | piRNA                 |
| 97  | chr12 | 31659934-31661154   | +/- | 21 | 21  | 21  | 0  | cis-nat-siRNA piRNA   |
| 98  | chr4  | 116658019-116664346 | +/- | 21 | 21  | 21  | 0  | trans-nat-siRNA (53)  |
| 99  | chr7  | 89817431-89817586   | +   | 20 | 164 | 148 | 2  |                       |
| 100 | chr19 | 44616735-44632652   | +   | 20 | 23  | 7   | 12 | piRNA                 |
| 101 | chr3  | 100597893-100601590 | -   | 20 | 21  | 7   | 12 | piRNA                 |
| 102 | chr18 | 61318900-61324893   | -   | 20 | 21  | 5   | 16 | piRNA                 |
| 103 | chr9  | 67451766-67454167   | +   | 19 | 156 | 139 | 3  |                       |
| 104 | chr1  | 120505455-120512436 | +   | 19 | 22  | 5   | 17 | piRNA                 |
| 105 | chr4  | 135812545-135820680 | +   | 19 | 21  | 9   | 12 | piRNA                 |
| 106 | chr16 | 11574160-11597424   | +   | 19 | 21  | 10  | 8  | piRNA                 |
| 107 | chr1  | 34758131-34764196   | -   | 19 | 21  | 8   | 12 | piRNA                 |

|     |       |                     |     |    |     |     |    |                       |
|-----|-------|---------------------|-----|----|-----|-----|----|-----------------------|
| 108 | chr5  | 45509068-45539400   | +/- | 19 | 20  | 9   | 11 |                       |
| 109 | chr13 | 51156805-51163152   | +   | 19 | 20  | 5   | 14 |                       |
| 110 | chr17 | 63160920-63172370   | -   | 19 | 20  | 7   | 11 |                       |
| 111 | chr17 | 13278068-13292672   | -   | 19 | 20  | 7   | 13 | piRNA                 |
| 112 | chr6  | 40331826-40339075   | -   | 19 | 19  | 4   | 14 | piRNA                 |
| 113 | chr7  | 80168083-80185766   | +/- | 19 | 19  | 18  | 0  | trans-nat-siRNA (58)  |
| 114 | chr10 | 57540697-57545694   | +/- | 18 | 25  | 18  | 6  |                       |
| 115 | chr12 | 99700460-99731966   | -   | 18 | 22  | 8   | 14 | piRNA                 |
| 116 | chr3  | 9413355-9420647     | -   | 18 | 20  | 7   | 12 | piRNA                 |
| 117 | chr7  | 4962602-4964465     | +/- | 18 | 19  | 16  | 0  |                       |
| 118 | chr4  | 142703898-142704269 | +/- | 18 | 19  | 18  | 0  |                       |
| 119 | chr16 | 78133719-78138023   | -   | 18 | 19  | 17  | 1  |                       |
| 120 | chr3  | 103149689-103158115 | +/- | 18 | 19  | 17  | 0  | cis-nat-siRNA         |
| 121 | chr9  | 114933907-114946738 | +   | 18 | 18  | 6   | 11 |                       |
| 122 | chr4  | 131168448-131195984 | +/- | 18 | 18  | 17  | 0  | cis-nat-siRNA         |
| 123 | chr4  | 149061674-149061849 | +   | 17 | 159 | 156 | 2  |                       |
| 124 | chr18 | 74783814-74783981   | +/- | 17 | 21  | 19  | 0  |                       |
| 125 | chr3  | 50464302-50466857   | +/- | 17 | 20  | 18  | 1  |                       |
| 126 | chr9  | 3261498-3277798     | -   | 17 | 20  | 6   | 13 | piRNA                 |
| 127 | chr1  | 44994426-44999804   | -   | 17 | 20  | 10  | 10 |                       |
| 128 | chr10 | 116997414-116999574 | +/- | 17 | 20  | 19  | 0  | cis-nat-siRNA         |
| 129 | chr11 | 22468219-22495726   | -   | 17 | 19  | 7   | 11 |                       |
| 130 | chr6  | 8545951-8547015     | +   | 17 | 18  | 15  | 1  | trans-nat-siRNA (210) |
| 131 | chr3  | 138868338-138876679 | +   | 17 | 18  | 4   | 14 |                       |
| 132 | chr9  | 14287825-14300982   | -   | 17 | 17  | 7   | 9  |                       |
| 133 | chr10 | 119869799-119882982 | +/- | 17 | 17  | 15  | 0  |                       |
| 134 | chr2  | 121235120-121235783 | +   | 16 | 54  | 52  | 0  |                       |
| 135 | chr6  | 38619537-38628567   | -   | 16 | 20  | 8   | 10 | piRNA                 |
| 136 | chr11 | 94555502-94566332   | +/- | 16 | 18  | 10  | 6  |                       |
| 137 | chr6  | 81297736-81305583   | +   | 16 | 18  | 9   | 7  |                       |
| 138 | chr16 | 16824580-16840264   | +   | 16 | 17  | 3   | 14 | piRNA                 |
| 139 | chr8  | 54248043-54253836   | -   | 16 | 17  | 6   | 9  |                       |
| 140 | chr14 | 73259745-73270682   | -   | 16 | 17  | 3   | 12 |                       |
| 141 | chr9  | 20658329-20677052   | -   | 16 | 16  | 7   | 3  |                       |
| 142 | chr11 | 45495223-45511026   | -   | 16 | 16  | 5   | 9  | piRNA                 |
| 143 | chr4  | 152484173-152486536 | +/- | 16 | 16  | 15  | 0  | hp-siRNA              |
| 144 | chr18 | 67526739-67577405   | +   | 15 | 23  | 12  | 11 |                       |
| 145 | chr7  | 81780492-81780533   | +/- | 15 | 19  | 9   | 4  |                       |
| 146 | chr5  | 115559558-115561624 | -   | 15 | 17  | 16  | 1  |                       |
| 147 | chr8  | 13461792-13477199   | +   | 15 | 16  | 4   | 12 | piRNA                 |
| 148 | chr1  | 95406795-95423206   | +   | 15 | 16  | 5   | 9  | piRNA                 |
| 149 | chr11 | 103695150-103746901 | -   | 15 | 16  | 1   | 13 |                       |
| 150 | chr5  | 148619879-148633587 | +/- | 15 | 15  | 9   | 3  | piRNA                 |
| 151 | chr8  | 26616361-26631112   | +/- | 14 | 20  | 4   | 11 |                       |
| 152 | chr1  | 13159784-13175383   | +/- | 14 | 17  | 15  | 2  |                       |
| 153 | chr3  | 96577455-96646117   | +/- | 14 | 16  | 7   | 2  |                       |
| 154 | chr19 | 42703016-42704723   | +   | 14 | 16  | 5   | 10 |                       |
| 155 | chr1  | 185510729-185517260 | +   | 14 | 16  | 6   | 10 |                       |
| 156 | chr10 | 60823950-60829144   | -   | 14 | 15  | 3   | 10 |                       |
| 157 | chr8  | 129295474-129304740 | +   | 14 | 14  | 5   | 8  |                       |
| 158 | chrX  | 88694245-88694342   | +/- | 13 | 23  | 23  | 0  |                       |
| 159 | chr18 | 68375963-68389552   | +/- | 13 | 18  | 8   | 10 | piRNA                 |
| 160 | chr11 | 105870896-105882464 | +   | 13 | 18  | 5   | 12 | piRNA                 |
| 161 | chr3  | 6245265-6248969     | -   | 13 | 16  | 1   | 15 |                       |
| 162 | chr13 | 43206331-43212159   | -   | 13 | 16  | 10  | 6  | piRNA                 |
| 163 | chr3  | 132775264-132780217 | +/- | 13 | 15  | 12  | 3  |                       |

|     |       |                     |    |    |    |    |    |                       |
|-----|-------|---------------------|----|----|----|----|----|-----------------------|
| 164 | chr5  | 114624821-114635985 | +- | 13 | 15 | 3  | 10 |                       |
| 165 | chr8  | 107238704-107244407 | -  | 13 | 15 | 4  | 9  | piRNA                 |
| 166 | chr8  | 112618024-112624628 | -  | 13 | 15 | 7  | 8  | piRNA                 |
| 167 | chr2  | 161038825-161061882 | +  | 13 | 15 | 3  | 10 | piRNA                 |
| 168 | chr18 | 42771363-42775698   | +- | 13 | 14 | 12 | 1  | cis-nat-siRNA         |
| 169 | chr2  | 129491799-129522359 | +- | 13 | 14 | 6  | 5  |                       |
| 170 | chr17 | 45032004-45035472   | -  | 13 | 14 | 12 | 1  |                       |
| 171 | chr3  | 26802295-26807902   | -  | 13 | 14 | 6  | 7  |                       |
| 172 | chr6  | 39801276-39803027   | +- | 13 | 13 | 9  | 4  |                       |
| 173 | chr1  | 191154111-191172227 | -  | 13 | 13 | 2  | 11 |                       |
| 174 | chr17 | 28315845-28321841   | -  | 13 | 13 | 4  | 8  |                       |
| 175 | chrX  | 4293190-4303399     | -  | 13 | 13 | 2  | 9  |                       |
| 176 | chr5  | 104082608-104095309 | +  | 13 | 13 | 1  | 12 | piRNA                 |
| 177 | chr18 | 16208720-16215946   | -  | 13 | 13 | 6  | 6  | piRNA                 |
| 178 | chr3  | 97186697-97195680   | +  | 12 | 16 | 3  | 9  |                       |
| 179 | chr10 | 48222016-48224017   | +- | 12 | 15 | 10 | 4  | piRNA                 |
| 180 | chr17 | 9158916-9161441     | +  | 12 | 14 | 12 | 0  |                       |
| 181 | chr7  | 23903778-23927741   | +- | 12 | 13 | 9  | 3  |                       |
| 182 | chr11 | 5428058-5434381     | -  | 12 | 13 | 3  | 7  | piRNA                 |
| 183 | chr10 | 41870533-41874493   | -  | 12 | 13 | 3  | 9  | piRNA                 |
| 184 | chr11 | 6049181-6050516     | -  | 12 | 13 | 5  | 7  |                       |
| 185 | chr11 | 95582191-95588104   | +  | 12 | 12 | 3  | 8  | piRNA                 |
| 186 | chr5  | 115404297-115411357 | -  | 12 | 12 | 2  | 10 | piRNA                 |
| 187 | chrX  | 17234869-17242153   | -  | 12 | 12 | 5  | 5  |                       |
| 188 | chr1  | 167702458-167706714 | -  | 12 | 12 | 5  | 7  | piRNA                 |
| 189 | chr18 | 65748663-65761591   | +  | 12 | 12 | 4  | 5  | piRNA                 |
| 190 | chr2  | 100920049-100927042 | +- | 12 | 12 | 4  | 7  |                       |
| 191 | chr5  | 21320263-21320558   | -  | 11 | 13 | 7  | 5  |                       |
| 192 | chr2  | 28644737-28662243   | -  | 11 | 13 | 3  | 9  | piRNA                 |
| 193 | chrX  | 63882324-63887081   | +  | 11 | 13 | 4  | 7  |                       |
| 194 | chr1  | 37384478-37387632   | -  | 11 | 13 | 4  | 9  | piRNA                 |
| 195 | chr9  | 43894126-43903893   | -  | 11 | 13 | 1  | 10 | piRNA                 |
| 196 | chr4  | 139999570-140014688 | -  | 11 | 12 | 3  | 8  | piRNA                 |
| 197 | chr9  | 63445448-63450576   | -  | 11 | 12 | 1  | 11 |                       |
| 198 | chr16 | 96097712-96109333   | -  | 11 | 12 | 3  | 9  |                       |
| 199 | chr11 | 53260720-53281062   | +  | 11 | 12 | 7  | 2  |                       |
| 200 | chr14 | 75149422-75152155   | +- | 11 | 12 | 11 | 1  | cis-nat-siRNA         |
| 201 | chr2  | 24771332-24783870   | +- | 11 | 11 | 5  | 4  | piRNA                 |
| 202 | chr5  | 135230763-135231375 | +- | 11 | 11 | 11 | 0  | cis-nat-siRNA         |
| 203 | chr15 | 83182267-83192941   | -  | 11 | 11 | 3  | 7  |                       |
| 204 | chr14 | 28860563-28869129   | +  | 11 | 11 | 3  | 8  | piRNA                 |
| 205 | chr15 | 93068290-93072348   | -  | 11 | 11 | 3  | 8  | piRNA                 |
| 206 | chr4  | 151146856-151150721 | +  | 11 | 11 | 6  | 5  |                       |
| 207 | chr13 | 64202446-64205517   | -  | 11 | 11 | 7  | 4  | piRNA                 |
| 208 | chr13 | 38352627-38353981   | +- | 10 | 13 | 13 | 0  | cis-nat-siRNA         |
| 209 | chr1  | 74913195-74918326   | +  | 10 | 12 | 12 | 0  | cis-nat-siRNA         |
| 210 | chr10 | 4540955-4546987     | +- | 10 | 11 | 10 | 0  | trans-nat-siRNA (130) |
| 211 | chr2  | 112370289-112374057 | +  | 10 | 11 | 1  | 7  |                       |
| 212 | chr5  | 78340488-78343421   | +- | 10 | 11 | 7  | 1  |                       |
| 213 | chr10 | 126400198-126402431 | +  | 10 | 11 | 9  | 2  | piRNA                 |
| 214 | chr5  | 136194266-136273055 | +- | 10 | 10 | 5  | 5  | piRNA                 |
| 215 | chr5  | 90691748-90711649   | +  | 10 | 10 | 4  | 4  | piRNA                 |
| 216 | chr7  | 5678553-5678593     | +- | 10 | 10 | 5  | 4  |                       |
| 217 | chr5  | 72859514-72862801   | +- | 10 | 10 | 9  | 1  |                       |
| 218 | chr16 | 24897620-24906135   | +  | 10 | 10 | 1  | 8  | piRNA                 |
| 219 | chr11 | 115401202-115420852 | -  | 10 | 10 | 3  | 7  |                       |



|     |       |                     |     |    |    |    |    |       |
|-----|-------|---------------------|-----|----|----|----|----|-------|
| 220 | chr4  | 120389015-120393077 | +   | 10 | 10 | 3  | 7  | piRNA |
| 221 | chr2  | 160450912-160462914 | -   | 10 | 10 | 2  | 8  | piRNA |
| 222 | chr13 | 51987033-51999657   | +   | 9  | 12 | 3  | 9  |       |
| 223 | chr11 | 88781089-88788871   | -   | 9  | 11 | 10 | 0  |       |
| 224 | chr15 | 34562755-34571836   | -   | 9  | 11 | 0  | 10 |       |
| 225 | chr12 | 87403420-87410427   | +   | 9  | 11 | 2  | 9  |       |
| 226 | chr4  | 138165033-138169671 | -   | 9  | 11 | 4  | 7  | piRNA |
| 227 | chr3  | 9233185-9234811     | +/- | 9  | 10 | 9  | 0  |       |
| 228 | chr15 | 34220753-34228625   | +   | 9  | 10 | 1  | 9  |       |
| 229 | chr9  | 27097633-27106063   | +   | 9  | 10 | 5  | 4  | piRNA |
| 230 | chr14 | 45001894-45007212   | +   | 9  | 10 | 3  | 5  |       |
| 231 | chr15 | 80759962-80766473   | +   | 9  | 10 | 2  | 7  | piRNA |
| 232 | chr11 | 79501642-79513861   | +   | 9  | 9  | 3  | 5  | piRNA |
| 233 | chr3  | 33615089-33619227   | +/- | 9  | 9  | 7  | 2  |       |
| 234 | chr5  | 108731683-108733445 | -   | 9  | 9  | 7  | 2  |       |
| 235 | chr7  | 121863096-121872704 | +   | 9  | 9  | 4  | 5  | piRNA |
| 236 | chr1  | 49238587-49241102   | +/- | 9  | 9  | 5  | 4  | piRNA |
| 237 | chr15 | 98690860-98700158   | +/- | 9  | 9  | 8  | 0  |       |
| 238 | chr1  | 91411467-91412653   | +/- | 9  | 9  | 7  | 1  |       |
| 239 | chr4  | 127374823-127379960 | +/- | 9  | 9  | 3  | 6  |       |
| 240 | chr19 | 5388341-5388997     | +/- | 9  | 9  | 7  | 1  |       |
| 241 | chr16 | 10614394-10622645   | +/- | 9  | 9  | 4  | 5  | piRNA |
| 242 | chr4  | 47122099-47127933   | +   | 8  | 10 | 2  | 8  |       |
| 243 | chr6  | 83771865-83774455   | -   | 8  | 10 | 1  | 9  |       |
| 244 | chr18 | 44543508-44555328   | +/- | 8  | 10 | 3  | 6  | piRNA |
| 245 | chr9  | 76900901-76903575   | +   | 8  | 9  | 1  | 7  |       |
| 246 | chr8  | 126133046-126141010 | +/- | 8  | 9  | 7  | 1  |       |
| 247 | chr13 | 96436922-96438213   | +   | 8  | 9  | 5  | 1  | piRNA |
| 248 | chr11 | 120441863-120445572 | -   | 8  | 9  | 5  | 4  |       |
| 249 | chr11 | 61499101-61501230   | +/- | 8  | 9  | 8  | 1  |       |
| 250 | chr5  | 143804666-143818933 | +/- | 8  | 8  | 3  | 4  |       |
| 251 | chr6  | 89517913-89527260   | -   | 8  | 8  | 4  | 4  |       |
| 252 | chr15 | 98361734-98370374   | +/- | 8  | 8  | 7  | 0  | piRNA |
| 253 | chr8  | 119843540-119853024 | +/- | 8  | 8  | 3  | 4  |       |
| 254 | chr2  | 151999779-152005308 | +   | 8  | 8  | 1  | 6  | piRNA |
| 255 | chr7  | 52448319-52452629   | +/- | 8  | 8  | 3  | 5  |       |
| 256 | chr9  | 110102368-110108278 | -   | 8  | 8  | 0  | 8  |       |
| 257 | chr11 | 97211493-97214410   | +   | 8  | 8  | 2  | 6  |       |
| 258 | chr8  | 128934772-128950365 | +   | 8  | 8  | 3  | 4  | piRNA |
| 259 | chr9  | 8004651-8004985     | +/- | 8  | 8  | 8  | 0  |       |
| 260 | chrX  | 6311562-6322912     | -   | 8  | 8  | 0  | 7  | piRNA |
| 261 | chr16 | 93562473-93562692   | +   | 8  | 8  | 4  | 4  |       |
| 262 | chr5  | 111509922-111515929 | -   | 8  | 8  | 4  | 4  |       |
| 263 | chr8  | 119356863-119366277 | -   | 8  | 8  | 1  | 7  |       |
| 264 | chr18 | 33326187-33328502   | -   | 8  | 8  | 2  | 6  | piRNA |
| 265 | chr19 | 41637815-41653825   | +/- | 8  | 8  | 1  | 6  | piRNA |
| 266 | chr1  | 174213609-174219938 | +   | 8  | 8  | 0  | 8  | piRNA |
| 267 | chr7  | 139986307-139988398 | +   | 8  | 8  | 2  | 6  |       |
| 268 | chr19 | 46932520-46939165   | +/- | 8  | 8  | 2  | 5  | piRNA |
| 269 | chr4  | 117254902-117258913 | -   | 8  | 8  | 2  | 5  |       |
| 270 | chr5  | 36808213-36816089   | -   | 8  | 8  | 1  | 7  |       |
| 271 | chr5  | 110721206-110727475 | +/- | 8  | 8  | 6  | 1  |       |
| 272 | chr13 | 24995115-25000178   | -   | 8  | 8  | 4  | 4  |       |
| 273 | chr2  | 33272500-33276347   | -   | 8  | 8  | 1  | 7  | piRNA |
| 274 | chr3  | 134792701-134794491 | +/- | 8  | 8  | 4  | 3  |       |
| 275 | chr1  | 183038958-183038981 | -   | 7  | 16 | 15 | 0  |       |

|     |       |                     |     |   |    |   |   |       |
|-----|-------|---------------------|-----|---|----|---|---|-------|
| 276 | chr15 | 42185408-42185433   | +   | 7 | 11 | 8 | 2 |       |
| 277 | chr2  | 152952822-152961368 | +   | 7 | 10 | 3 | 7 |       |
| 278 | chr5  | 141012034-141013417 | +/- | 7 | 10 | 5 | 4 |       |
| 279 | chr17 | 5120193-5134102     | +   | 7 | 10 | 3 | 7 | piRNA |
| 280 | chr4  | 62619564-62623539   | +   | 7 | 9  | 3 | 6 |       |
| 281 | chr19 | 15709187-15721356   | -   | 7 | 9  | 1 | 8 | piRNA |
| 282 | chr1  | 74631966-74634487   | +   | 7 | 9  | 1 | 8 | piRNA |
| 283 | chr18 | 87604937-87613299   | +/- | 7 | 9  | 5 | 0 |       |
| 284 | chr10 | 14336030-14345739   | +/- | 7 | 9  | 6 | 3 |       |
| 285 | chr3  | 8557865-8568358     | +/- | 7 | 8  | 0 | 7 |       |
| 286 | chr2  | 28507994-28512110   | +   | 7 | 8  | 0 | 7 | piRNA |
| 287 | chr15 | 76159740-76166157   | +/- | 7 | 8  | 7 | 1 |       |
| 288 | chr5  | 113729437-113734901 | +   | 7 | 8  | 1 | 7 | piRNA |
| 289 | chr1  | 172033076-172035869 | -   | 7 | 8  | 5 | 3 | piRNA |
| 290 | chr6  | 54570452-54574287   | +   | 7 | 8  | 3 | 5 | piRNA |
| 291 | chr4  | 45417642-45421236   | -   | 7 | 8  | 2 | 6 | piRNA |
| 292 | chr17 | 38152580-38164996   | -   | 7 | 8  | 1 | 7 |       |
| 293 | chr1  | 90095231-90097373   | -   | 7 | 8  | 3 | 5 | piRNA |
| 294 | chr9  | 7184560-7184854     | +/- | 7 | 7  | 6 | 0 |       |
| 295 | chr17 | 27617719-27629066   | +/- | 7 | 7  | 0 | 6 | piRNA |
| 296 | chr4  | 146309698-146315785 | +/- | 7 | 7  | 3 | 2 |       |
| 297 | chr12 | 18317514-18321029   | +   | 7 | 7  | 2 | 5 |       |
| 298 | chr11 | 60712602-60723112   | -   | 7 | 7  | 3 | 4 |       |
| 299 | chr6  | 134822441-134824157 | +   | 7 | 7  | 3 | 3 | piRNA |
| 300 | chr4  | 126814167-126816934 | +/- | 7 | 7  | 5 | 1 |       |
| 301 | chr2  | 3775123-3781227     | +/- | 7 | 7  | 3 | 3 |       |
| 302 | chr6  | 128147654-128152146 | -   | 7 | 7  | 2 | 5 | piRNA |
| 303 | chr18 | 35392471-35402296   | -   | 7 | 7  | 0 | 6 |       |
| 304 | chr1  | 105032976-105041994 | +/- | 7 | 7  | 3 | 3 |       |
| 305 | chr18 | 80467071-80471925   | +/- | 7 | 7  | 6 | 1 |       |
| 306 | chr16 | 8574827-8579722     | -   | 7 | 7  | 1 | 5 |       |
| 307 | chr11 | 59271657-59278844   | +   | 7 | 7  | 1 | 6 | piRNA |
| 308 | chr4  | 140950037-140956836 | -   | 7 | 7  | 0 | 6 | piRNA |
| 309 | chr12 | 88049245-88060501   | +/- | 7 | 7  | 3 | 3 | piRNA |
| 310 | chr9  | 59284219-59284554   | +/- | 7 | 7  | 6 | 0 |       |
| 311 | chr11 | 77331551-77338484   | +   | 6 | 9  | 1 | 8 |       |
| 312 | chr8  | 113884363-113892285 | -   | 6 | 8  | 6 | 2 | piRNA |
| 313 | chr10 | 80993410-80999321   | +/- | 6 | 8  | 4 | 4 |       |
| 314 | chr14 | 25927114-25932205   | +   | 6 | 8  | 1 | 6 | piRNA |
| 315 | chr15 | 62920430-62925880   | -   | 6 | 7  | 3 | 2 |       |
| 316 | chr14 | 63769408-63772627   | -   | 6 | 7  | 0 | 7 | piRNA |
| 317 | chr14 | 83953963-83954918   | +/- | 6 | 7  | 3 | 3 |       |
| 318 | chr4  | 3793047-3798960     | +/- | 6 | 7  | 3 | 4 |       |
| 319 | chr16 | 18414509-18422102   | +   | 6 | 7  | 0 | 7 | piRNA |
| 320 | chr7  | 99795112-99800393   | -   | 6 | 7  | 2 | 5 | piRNA |
| 321 | chr12 | 82635238-82643169   | -   | 6 | 7  | 5 | 2 | piRNA |
| 322 | chr3  | 76055232-76060954   | +/- | 6 | 7  | 4 | 3 |       |
| 323 | chr11 | 4765167-4772453     | +   | 6 | 7  | 7 | 0 |       |
| 324 | chr2  | 164511521-164517325 | +/- | 6 | 7  | 4 | 3 |       |
| 325 | chr16 | 32197122-32197924   | +/- | 6 | 7  | 6 | 0 |       |
| 326 | chr12 | 105433762-105434028 | +/- | 6 | 7  | 6 | 1 |       |
| 327 | chr2  | 153088831-153096012 | +   | 6 | 7  | 0 | 5 |       |
| 328 | chr15 | 62198518-62207195   | +/- | 6 | 7  | 4 | 3 |       |
| 329 | chr4  | 44132697-44137830   | +   | 6 | 7  | 0 | 7 |       |
| 330 | chr6  | 26704111-26704153   | +/- | 6 | 7  | 4 | 1 |       |
| 331 | chr12 | 8936286-8939367     | +   | 6 | 7  | 2 | 2 | piRNA |

|     |       |                     |     |   |    |    |   |       |
|-----|-------|---------------------|-----|---|----|----|---|-------|
| 332 | chr2  | 143631434-143634165 | + - | 6 | 6  | 2  | 3 |       |
| 333 | chr6  | 142968662-142972444 | -   | 6 | 6  | 2  | 2 |       |
| 334 | chr5  | 147045545-147047971 | -   | 6 | 6  | 0  | 4 | piRNA |
| 335 | chr5  | 110872541-110883104 | +   | 6 | 6  | 3  | 3 | piRNA |
| 336 | chr7  | 81476972-81483420   | -   | 6 | 6  | 1  | 5 |       |
| 337 | chr13 | 111459564-111461024 | + - | 6 | 6  | 5  | 1 |       |
| 338 | chr8  | 43042317-43048284   | +   | 6 | 6  | 1  | 4 |       |
| 339 | chr8  | 124482114-124491255 | + - | 6 | 6  | 5  | 1 |       |
| 340 | chr9  | 35106703-35108480   | + - | 6 | 6  | 6  | 0 |       |
| 341 | chr4  | 59864700-59866047   | -   | 6 | 6  | 1  | 5 | piRNA |
| 342 | chrX  | 14035030-14039295   | +   | 6 | 6  | 2  | 3 |       |
| 343 | chr4  | 100596727-100605257 | +   | 6 | 6  | 0  | 6 |       |
| 344 | chr9  | 119284785-119288559 | +   | 6 | 6  | 1  | 5 | piRNA |
| 345 | chr7  | 121428230-121437711 | -   | 6 | 6  | 2  | 4 | piRNA |
| 346 | chr5  | 33980708-33988920   | +   | 6 | 6  | 6  | 0 |       |
| 347 | chr1  | 35832995-35842811   | + - | 6 | 6  | 3  | 3 |       |
| 348 | chr10 | 36287103-36291897   | +   | 6 | 6  | 1  | 5 |       |
| 349 | chr10 | 87500596-87509391   | -   | 6 | 6  | 2  | 3 |       |
| 350 | chr1  | 180173816-180174451 | + - | 6 | 6  | 5  | 0 |       |
| 351 | chr16 | 98214356-98218563   | -   | 6 | 6  | 1  | 5 |       |
| 352 | chr12 | 105166117-105171063 | -   | 6 | 6  | 3  | 3 | piRNA |
| 353 | chr13 | 56480018-56491622   | +   | 6 | 6  | 2  | 4 |       |
| 354 | chr16 | 14908733-14911890   | -   | 6 | 6  | 4  | 2 |       |
| 355 | chr12 | 3901604-3911961     | +   | 6 | 6  | 1  | 5 | piRNA |
| 356 | chr4  | 150779848-150787415 | + - | 6 | 6  | 2  | 1 |       |
| 357 | chr10 | 5988630-5991767     | -   | 6 | 6  | 4  | 1 |       |
| 358 | chr4  | 125836721-125844131 | -   | 6 | 6  | 2  | 3 | piRNA |
| 359 | chr4  | 78320998-78322438   | +   | 6 | 6  | 4  | 1 |       |
| 360 | chr11 | 97605437-97613251   | +   | 5 | 35 | 2  | 0 |       |
| 361 | chr13 | 115316811-115316831 | -   | 5 | 28 | 26 | 0 |       |
| 362 | chr9  | 69999182-69999201   | -   | 5 | 24 | 2  | 0 |       |
| 363 | chr7  | 139809052-139809072 | -   | 5 | 18 | 15 | 0 | piRNA |
| 364 | chr8  | 98213653-98221198   | -   | 5 | 12 | 6  | 6 |       |
| 365 | chr5  | 82107595-82107614   | +   | 5 | 12 | 11 | 1 |       |
| 366 | chr5  | 136552505-136556146 | -   | 5 | 8  | 1  | 7 |       |
| 367 | chr1  | 186523196-186523276 | -   | 5 | 8  | 8  | 0 |       |
| 368 | chr4  | 118903961-118904197 | -   | 5 | 7  | 7  | 0 |       |
| 369 | chr13 | 29347957-29355599   | + - | 5 | 7  | 0  | 7 | piRNA |
| 370 | chr5  | 147264217-147269361 | + - | 5 | 7  | 4  | 3 |       |
| 371 | chr11 | 118844500-118847128 | +   | 5 | 6  | 0  | 3 |       |
| 372 | chr15 | 31920753-31927669   | +   | 5 | 6  | 0  | 6 |       |
| 373 | chr15 | 81512032-81515042   | +   | 5 | 6  | 2  | 4 |       |
| 374 | chr5  | 143132237-143136224 | -   | 5 | 6  | 2  | 3 | piRNA |
| 375 | chr10 | 75483331-75487605   | + - | 5 | 6  | 2  | 4 |       |
| 376 | chr13 | 43313523-43315005   | + - | 5 | 6  | 4  | 2 |       |
| 377 | chr1  | 173177956-173178961 | + - | 5 | 6  | 6  | 0 |       |
| 378 | chr3  | 36756981-36760554   | + - | 5 | 6  | 5  | 1 |       |
| 379 | chr11 | 3093081-3093843     | + - | 5 | 6  | 5  | 1 |       |
| 380 | chr6  | 85389576-85397467   | +   | 5 | 6  | 4  | 2 |       |
| 381 | chr5  | 34492245-34494538   | -   | 5 | 6  | 4  | 2 |       |
| 382 | chr18 | 34896583-34899483   | +   | 5 | 6  | 3  | 3 |       |
| 383 | chr3  | 11164754-11169061   | -   | 5 | 6  | 2  | 4 |       |
| 384 | chr1  | 60421864-60425159   | +   | 5 | 6  | 1  | 4 |       |
| 385 | chr1  | 162841119-162849022 | -   | 5 | 6  | 3  | 3 | piRNA |
| 386 | chr18 | 44787043-44787518   | + - | 5 | 6  | 2  | 3 | piRNA |
| 387 | chr13 | 56745618-56751271   | +   | 5 | 6  | 0  | 5 | piRNA |

|     |       |                     |     |   |   |   |   |       |
|-----|-------|---------------------|-----|---|---|---|---|-------|
| 388 | chr19 | 35550807-35554633   | +   | 5 | 5 | 1 | 4 |       |
| 389 | chr8  | 73281801-73286707   | +/- | 5 | 5 | 5 | 0 |       |
| 390 | chr6  | 36578038-36579473   | +   | 5 | 5 | 1 | 4 |       |
| 391 | chr5  | 136387678-136395935 | +/- | 5 | 5 | 3 | 2 |       |
| 392 | chr1  | 152898423-152904530 | +   | 5 | 5 | 2 | 3 |       |
| 393 | chr18 | 75293767-75302159   | +   | 5 | 5 | 1 | 4 |       |
| 394 | chr10 | 69585523-69588019   | +/- | 5 | 5 | 1 | 1 | piRNA |
| 395 | chr5  | 135601446-135610329 | -   | 5 | 5 | 2 | 3 | piRNA |
| 396 | chr4  | 37556395-37556418   | +/- | 5 | 5 | 3 | 2 |       |
| 397 | chr19 | 47314742-47316298   | -   | 5 | 5 | 1 | 3 | piRNA |
| 398 | chr4  | 134684500-134686381 | -   | 5 | 5 | 1 | 3 | piRNA |
| 399 | chr4  | 132469647-132470934 | +   | 5 | 5 | 1 | 4 | piRNA |
| 400 | chr9  | 21658122-21660328   | -   | 5 | 5 | 1 | 4 |       |
| 401 | chr1  | 136571507-136574950 | -   | 5 | 5 | 0 | 5 | piRNA |
| 402 | chr4  | 115586752-115594523 | +/- | 5 | 5 | 4 | 1 |       |
| 403 | chr6  | 118538604-118538644 | +   | 5 | 5 | 3 | 2 |       |
| 404 | chrX  | 16663535-16669345   | -   | 5 | 5 | 2 | 3 | piRNA |
| 405 | chr9  | 70871324-70880973   | +   | 5 | 5 | 0 | 4 |       |
| 406 | chr3  | 138046044-138046063 | -   | 5 | 5 | 1 | 0 |       |
| 407 | chr9  | 63554665-63556113   | +/- | 5 | 5 | 4 | 1 |       |
| 408 | chr6  | 116658718-116660694 | -   | 5 | 5 | 1 | 3 |       |
| 409 | chr6  | 116367342-116373718 | +   | 5 | 5 | 3 | 2 | piRNA |
| 410 | chr6  | 147031958-147037907 | +/- | 5 | 5 | 1 | 4 |       |
| 411 | chr1  | 46207886-46210345   | +   | 5 | 5 | 2 | 3 |       |
| 412 | chr7  | 130413235-130414520 | +   | 5 | 5 | 1 | 4 |       |
| 413 | chr7  | 67600806-67610020   | +   | 5 | 5 | 2 | 3 |       |
| 414 | chr11 | 60353966-60355183   | +/- | 5 | 5 | 3 | 1 |       |
| 415 | chr2  | 38546330-38549443   | -   | 5 | 5 | 1 | 4 | piRNA |
| 416 | chr2  | 25757145-25761954   | -   | 5 | 5 | 3 | 0 |       |
| 417 | chr12 | 92038250-92044184   | +/- | 5 | 5 | 2 | 3 |       |
| 418 | chr13 | 58137185-58137856   | +/- | 5 | 5 | 5 | 0 |       |
| 419 | chr16 | 94918792-94919700   | +   | 5 | 5 | 1 | 4 |       |
| 420 | chr9  | 65863575-65864527   | +/- | 5 | 5 | 4 | 1 |       |
| 421 | chr11 | 97899431-97901848   | -   | 5 | 5 | 3 | 2 | piRNA |
| 422 | chr11 | 117824890-117831372 | +   | 5 | 5 | 3 | 2 |       |
| 423 | chr12 | 85531341-85540000   | +   | 5 | 5 | 1 | 3 |       |
| 424 | chr13 | 11550798-11555216   | -   | 5 | 5 | 5 | 0 |       |
| 425 | chr13 | 23941242-23942569   | +/- | 5 | 5 | 3 | 2 |       |
| 426 | chr15 | 27541614-27550415   | -   | 5 | 5 | 1 | 4 |       |
| 427 | chr2  | 76541713-76550299   | -   | 5 | 5 | 2 | 3 | piRNA |
| 428 | chr12 | 111711571-111714318 | +   | 5 | 5 | 2 | 3 |       |
| 429 | chr13 | 73976093-73982302   | +/- | 5 | 5 | 3 | 1 |       |
| 430 | chr13 | 12668452-12676580   | -   | 5 | 5 | 0 | 5 | piRNA |
| 431 | chr2  | 163308159-163309840 | +   | 5 | 5 | 2 | 2 |       |
| 432 | chr2  | 131996629-132001619 | +   | 5 | 5 | 2 | 2 | piRNA |
| 433 | chr2  | 21280255-21286211   | +/- | 5 | 5 | 0 | 5 |       |
| 434 | chr4  | 25598518-25603682   | +/- | 5 | 5 | 1 | 4 |       |
| 435 | chr11 | 57201351-57202592   | -   | 5 | 5 | 2 | 3 |       |
| 436 | chr3  | 62691658-62692423   | +/- | 5 | 5 | 4 | 1 |       |
| 437 | chr3  | 19341644-19349828   | -   | 5 | 5 | 0 | 4 |       |
| 438 | chr10 | 33971755-33972395   | +/- | 5 | 5 | 4 | 0 |       |
| 439 | chr5  | 66190136-66191498   | +   | 5 | 5 | 2 | 2 | piRNA |
| 440 | chr19 | 3171146-3172891     | +   | 5 | 5 | 1 | 4 |       |
| 441 | chr14 | 25746223-25752890   | -   | 5 | 5 | 1 | 3 |       |
| 442 | chr17 | 9027586-9032570     | +   | 5 | 5 | 1 | 4 |       |
| 443 | chr2  | 26727417-26730230   | -   | 5 | 5 | 0 | 4 |       |

444 chr15 81650780-81656011 +- 5 5 2 3

---

<sup>1</sup> This hp-siRNA cluster was found by observation, not by the computational search.

<sup>2</sup> The number in the parenthesis after "trans-nat-siRNA" represents the partner cluster.
